# Supplementary material for: Genome-Wide Identification and Expression Analysis of SNARE Genes in Brassica napus
Source: MDPI journal article supplement (doi:10.3390/plants11050711), 2022-03-07
Supplement: s1 [file s1]

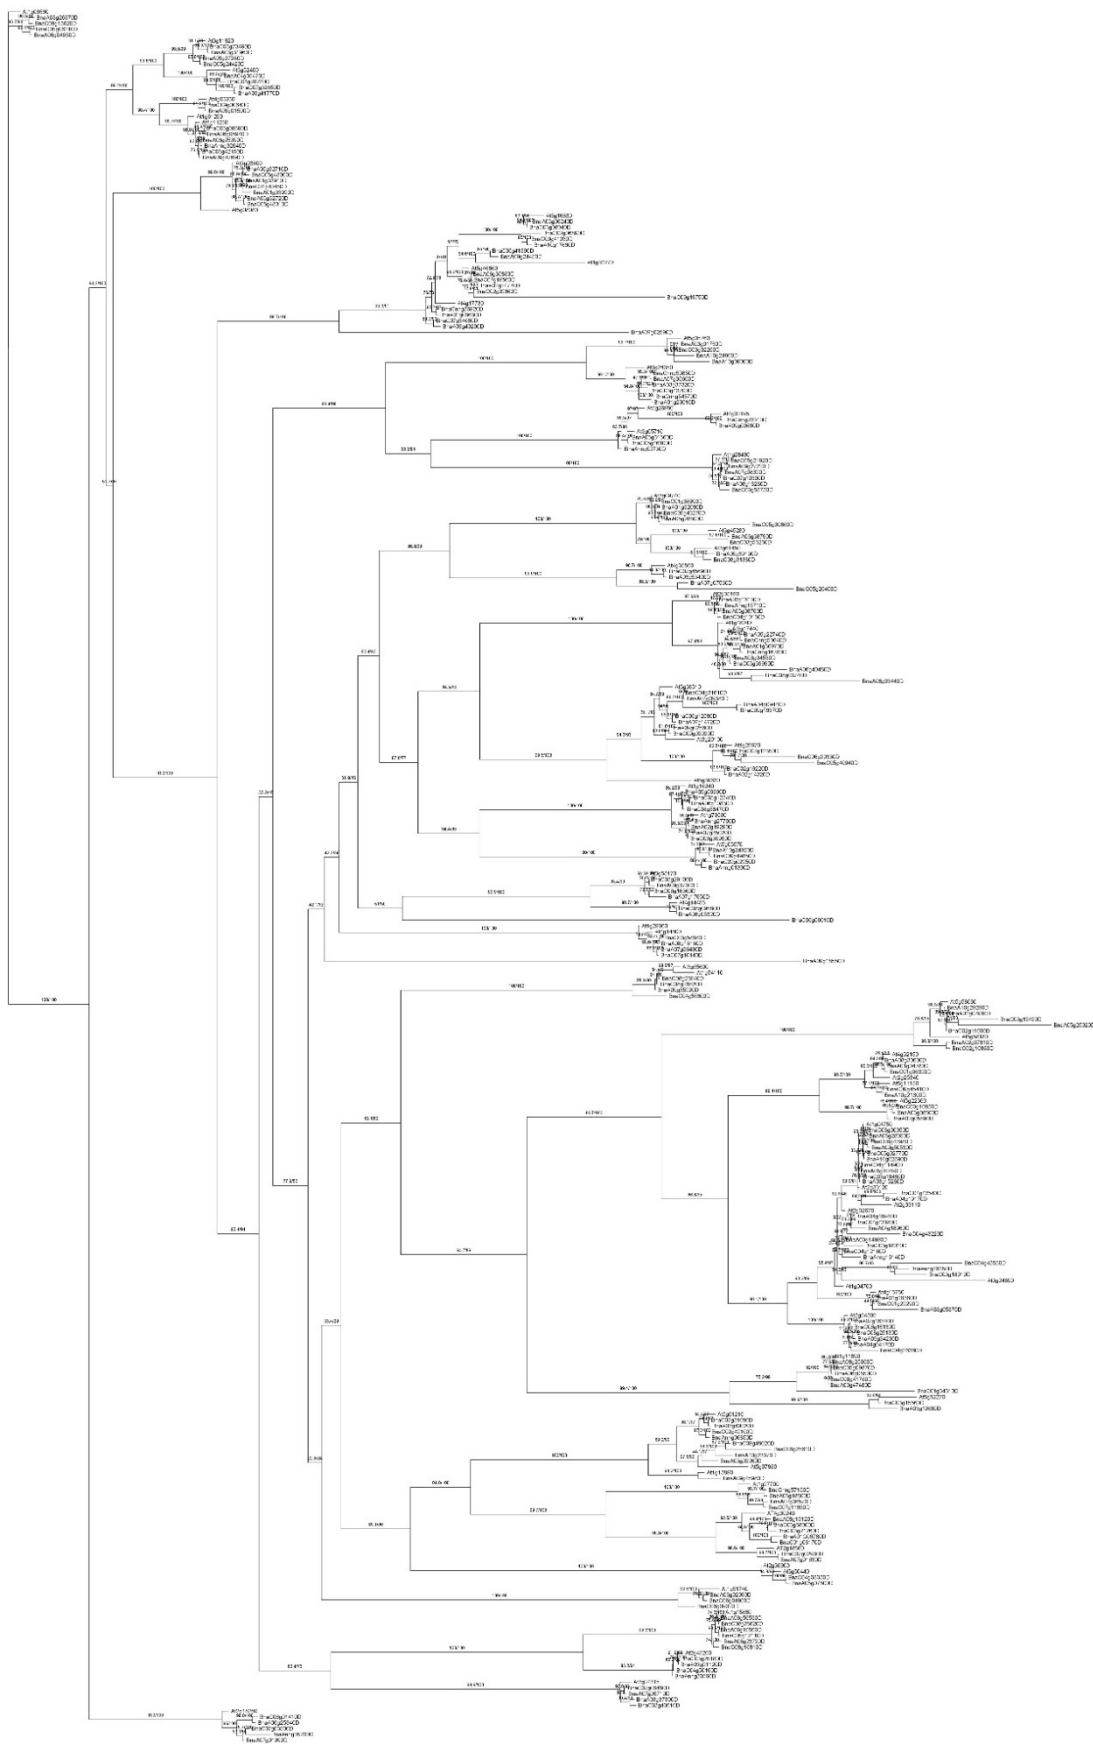

**Figure S1.** Maximum likelihood phylogeny of SNARE proteins from *B. napus* and *A. thaliana* Branches not transformed. SH-

aLRT and Ultrafast bootstrap values are indicated on the branches.

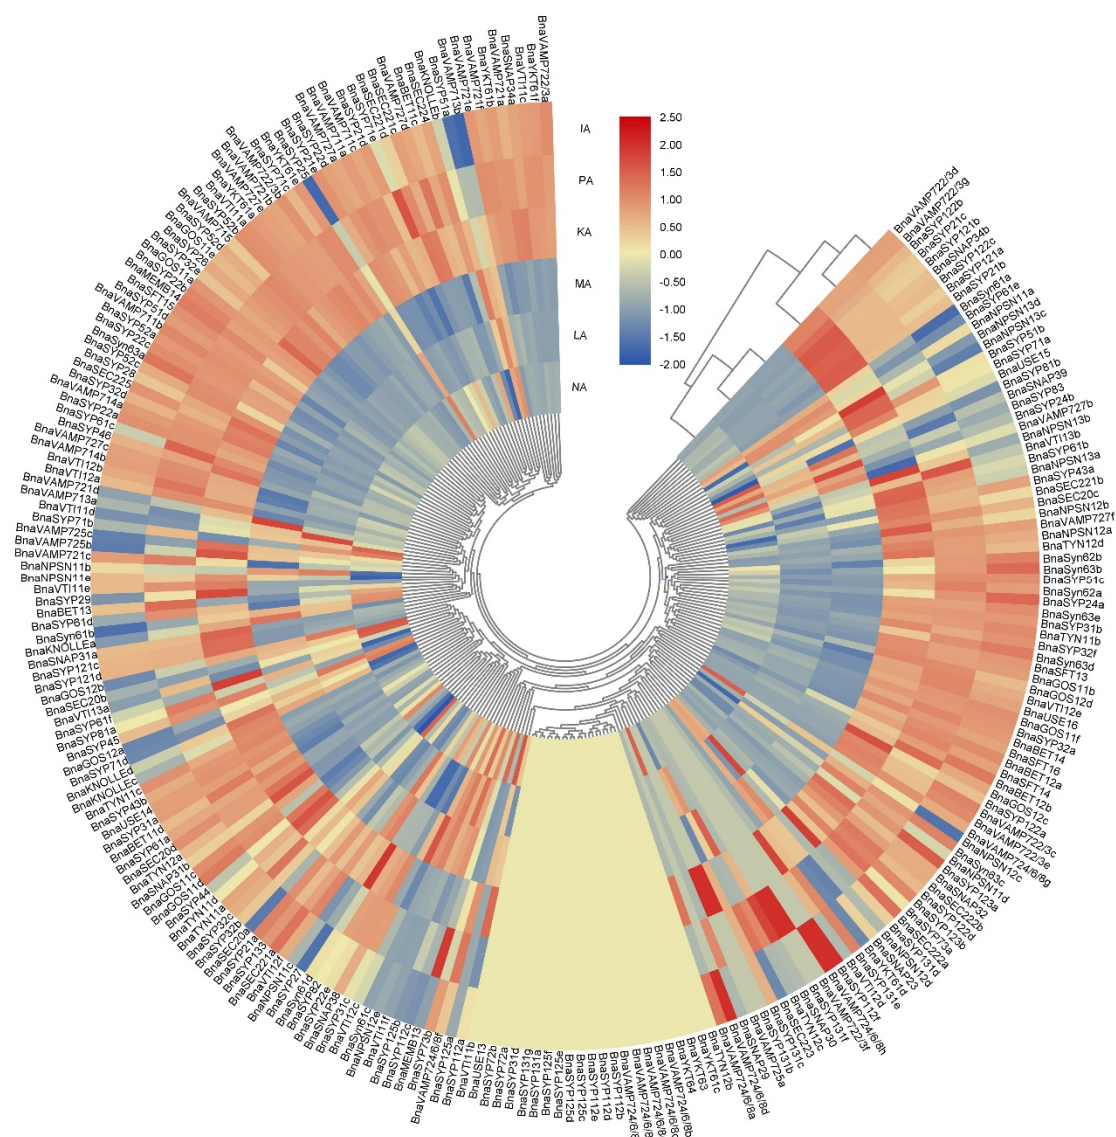

**Figure S2. Expression profiles of *BnaSNAREs* in roots and leaves of *B. napus*** PA, IA, KA represent *B. napus* roots replicate 1, 2 and 3 transcriptomes; LA, MA, NA represented *B. napus* leaves replicate 1, 2 and 3 transcriptomes. Data were normalized by Log2 (RPKM: Reads Per kb Per Million reads). The cluster tree of the *BnaSNAREs* based on the expression level is shown at the center and top.

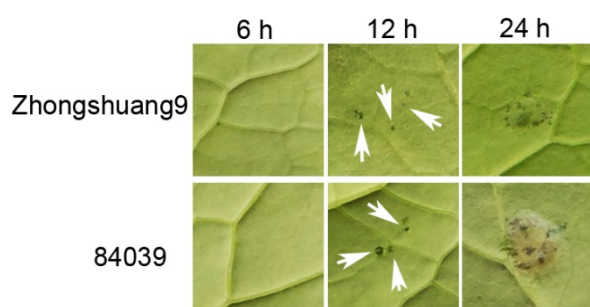

**Figure S3.** Lesions in the leaves of *B. napus* varieties Zhongshuang9 and 84039 at different time after inoculation with *S. sclerotiorum*.
