# Supplementary material for: Genome-Wide Identification and Expression Analysis of SNARE Genes in Brassica napus
Source: Plants (Basel). 2022 Mar 7;11(5):711. doi: 10.3390/plants11050711 (PMC8912762; doi:10.3390/plants11050711)
Supplement: Supplementary file 1 [file plants-11-00711-s001.zip › Tables S1¿CS15.xlsx]

## Sheet: S1
Tabel 1 Characteristics of SNARE genes from B. napus
Gene name	Gene ID	At. Gene ID(Name)	chormsome location				Protein			conserved domain
			Chr. No.	Start	End	Strand	Length(aa)	Mw. (KDa)	pI	From	To	Domain
BnaKNOLLEa	BnaC05g06210D	At1g08560(KNOLLE)	chrC05	3054510	3055705	-	307	34.95	6.42	44, 245	244, 283	Syntaxin, SNARE
BnaKNOLLEb	BnaA06g04950D		chrA06	2854171	2855804	-	307	34.97	6.42	44, 245	244, 283	Syntaxin, SNARE
BnaKNOLLEc	BnaA08g26870D		chrA08	18075513	18076427	+	304	34.75	6.65	40, 209	241, 275	Syntaxin, SNARE
BnaKNOLLEd	BnaC08g13620D		chrC08	18720021	18720932	-	303	34.62	6.34	39, 241	240, 279	Syntaxin, SNARE
BnaSYP112a	BnaA06g25340D	At2g18260(SYP112)	chrA06	17499406	17500269	-	287	32.47	5.79	39, 197	227, 285	Syntaxin, COG5325
BnaSYP112b	BnaC06g01410D		chrC06	2142246	2143106	+	286	32.27	6.09	3, 196	226, 284	Syntaxin, COG5325
BnaSYP112c	BnaA07g01990D		chrA07	1649553	1650444	+	288	32.86	7.28	40, 198	228, 286	Syntaxin, COG5325
BnaSYP112d	BnaC07g03500D		chrC07	4710747	4711355	-	202	22.97	9.71	1, 111	142, 176	Syntaxin, SNARE
BnaSYP112e	BnaAnng35230D		chrAnn_R	40021640	40021867	+	69	8.05	9.36	1	69	Syntaxin
BnaSYP112f	BnaAnng38190D		chrAnn_R	43252580	43252807	-	69	8.05	9.36	1	69	Syntaxin
BnaSYP121a	BnaA03g31960D	At3g11820(SYP121/PEN1)	chrA03	15426637	15428603	-	334	36.86	9.66	36, 209	241, 275	Syntaxin, SNARE
BnaSYP121b	BnaC03g73490D		chrC03_R	1570592	1572276	-	333	36.7	9.66	35, 208	240, 274	Syntaxin, SNARE
BnaSYP121c	BnaA05g27280D		chrA05	19700444	19702059	+	339	37.33	9.37	35, 208	240, 274	Syntaxin, SNARE
BnaSYP121d	BnaC05g41390D		chrC05	39147905	39151779	+	269	37.02	9.77	30, 179	130, 237	Syntaxin_2, SNARE_Qa
BnaSYP122a	BnaA03g41770D	At3g52400(SYP122)	chrA03	20959523	20960887	-	334	37.79	8.78	38, 211	242, 277	Syntaxin, SNARE
BnaSYP122b	BnaA04g05470D		chrA04	4244817	4246287	+	343	38.65	9.07	44, 218	250, 284	Syntaxin, SNARE
BnaSYP122c	BnaC04g28220D		chrC04	29682848	29683475	+	105	11.58	10.84	10	50	SNARE
BnaSYP122d	BnaC07g32850D		chrC07	36259511	36260919	-	336	38.05	8.47	38, 211	243, 277	Syntaxin, SNARE
BnaSYP123a	BnaA09g01500D	At4g03330(SYP123)	chrA09	802001	803536	+	305	34.46	7.62	36, 209	241, 275	Syntaxin, SNARE
BnaSYP123b	BnaC09g00640D		chrC09	346225	347738	+	305	34.36	7.62	36, 209	241, 275	Syntaxin, SNARE
BnaSYP125a	BnaC05g08590D	At1g61290/At1g11250(SYP124/125)	chrC05	4503477	4504444	+	298	33.95	6.09	28, 201	233, 267	Syntaxin, SNARE
BnaSYP125b	BnaA06g06940D		chrA06	3717151	3718120	+	298	33.98	6.09	28, 201	233, 267	Syntaxin, SNARE
BnaSYP125c	BnaA08g25390D		chrA08	17480606	17481767	-	298	33.92	6.38	28, 201	233, 267	Syntaxin, SNARE
BnaSYP125d	BnaC08g42150D		chrC08	36465279	36466380	-	298	33.89	6.38	28, 201	233, 267	Syntaxin, SNARE
BnaSYP125e	BnaA09g47690D		chrA09	32114727	32115889	-	298	33.93	6.39	28, 201	233, 267	Syntaxin, SNARE
BnaSYP125f	BnaAnng32640D		chrAnn_R	37274652	37275836	+	298	33.89	6.38	28, 201	233, 267	Syntaxin, SNARE
BnaSYP131a	BnaA01g33910D	At3g03800/At5g08080(SYP131/132)	chrA01	22953668	22954456	-	133	14.99	5.67	1, 34	66, 100	Syntaxin, SNARE
BnaSYP131b	BnaA01g33920D		chrA01	22954526	22955979	-	179	20.32	10.12	35	174	Syntaxin
BnaSYP131c	BnaC01g40450D		chrC01	38726141	38728446	-	310	35.03	9.06	35, 208	240, 274	Syntaxin, SNARE
BnaSYP131d	BnaA05g32710D		chrA05	22369544	22370309	-	135	15.18	6.52	1, 34	66, 100	Syntaxin, SNARE
BnaSYP131e	BnaA05g32720D		chrA05	22370382	22372013	-	177	20.11	10.24	35	174	Syntaxin
BnaSYP131f	BnaC05g48000D		chrC05	42704093	42704850	-	135	15.23	6.96	1, 34	66, 100	Syntaxin, SNARE
BnaSYP131g	BnaC05g48010D		chrC05	42704923	42706528	-	174	19.73	10.04	35	171	Syntaxin
BnaSYP133	BnaA09g18550D		chrA09	11512374	11516379	-	268	31.05	9.24	171	218	Syntaxin
BnaSYP21a	BnaC02g06890D	At5g16830(SYP21)	chrC02	3680400	3681999	-	197	22.07	4.5	21, 107	183, 165	COG5325, SNARE_Qa
BnaSYP21b	BnaA03g06240D		chrA03	2804573	2806668	-	276	30.74	6.1	31, 186	161, 244	SynN, SNARE_Qa
BnaSYP21c	BnaC03g08040D		chrC03	3796614	3798689	-	276	30.74	5.24	31, 186	161, 244	SynN, SNARE_Qa
BnaSYP21d	BnaC09g41030D		chrC09	43207670	43209924	+	276	30.83	5.09	33, 186	133, 244	Syntaxin_2, SNARE_Qa
BnaSYP21e	BnaA10g17660D		chrA10	12995400	12997630	+	279	31.13	5.09	36, 189	136, 247	Syntaxin_2, SNARE_Qa
BnaSYP22a	BnaA02g24770D	At5g46860(SYP22/SGR3)	chrA02	18073570	18075499	-	267	29.19	6.37	27, 177	127, 235	Syntaxin_2, SNARE_Qa
BnaSYP22b	BnaC02g32860D		chrC02	35370588	35372678	-	267	29.17	6.52	27, 177	127, 235	Syntaxin_2, SNARE_Qa
BnaSYP22c	BnaA06g35880D		chrA06	23502737	23504416	+	270	29.36	6.81	30, 180	139, 238	Syntaxin_2, SNARE_Qa
BnaSYP22d	BnaC07g19560D		chrC07	26299332	26301050	-	271	29.43	6.81	31, 181	131, 239	Syntaxin_2, SNARE_Qa
BnaSYP22e	BnaC09g19750D	At4g17730(SYP23)	chrC09	16837828	16840342	-	261	29.82	10.33	54, 141	119, 169	Syntaxin_2, SNARE
BnaSYP24a	BnaC05g24420D		chrC05	18905521	18907649	+	335	29.93	6.25	35, 208	240, 274	Syntaxin, SNARE
BnaSYP24b	BnaA09g24450D		chrA09	17147483	17149282	-	263	29.4	6.87	24, 173	124, 231	Syntaxin_2, SNARE_Qa
BnaSYP25	BnaA01g08630D		chrA01	4142215	4143988	+	276	30.47	7.3	32, 186	132, 244	Syntaxin_2, SNARE_Qa
BnaSYP26	BnaA03g43290D		chrA03	21736086	21737831	+	278	30.68	6.43	34, 188	134, 246	Syntaxin_2, SNARE_Qa
BnaSYP27	BnaA07g02590D		chrA07	2252453	2257455	-	282	32.29	9.41	68, 212	162, 239	Syntaxin_2, zf-Dof
BnaSYP28	BnaC07g34680D	At1g32270(SYP24 )	chrC07	37298791	37300551	+	277	30.59	6.69	33, 204	133, 245	Syntaxin_2, SNARE_Qa
BnaSYP29	BnaCnng36920D		chrCnn_R	35223612	35225326	-	273	29.76	6.17	38, 183	129, 241	Syntaxin_2, SNARE_Qa
BnaSYP31a	BnaA03g01750D	At5g05760(SYP31)	chrA03	824886	827137	-	340	37.53	9.72	251	335	SNARE_syntaxin5
BnaSYP31b	BnaC03g02260D		chrC03	1078898	1081061	-	341	37.71	9.45	252	336	SNARE_syntaxin5
BnaSYP31c	BnaA10g09000D		chrA10	7943605	7944109	+	111	12.43	6.5	36	106	SNARE_syntaxin5
BnaSYP31d	BnaA10g24800D		chrA10	16132642	16132919	+	64	7.15	6.51	1	63	SNARE
BnaSYP32a	BnaA01g23010D	At3g24350(SYP32)	chrA01	15356635	15358662	-	342	38.13	9.65	253	337	SNARE_syntaxin5
BnaSYP32b	BnaA03g37320D		chrA03	18484658	18486607	+	353	39.8	10.23	264	348	SNARE_syntaxin5
BnaSYP32c	BnaC03g43700D		chrC03	28814029	28816153	+	337	37.94	9.94	248	332	SNARE_syntaxin5
BnaSYP32d	BnaA07g05660D		chrA07	5994251	5996256	-	344	38.54	9.9	255	339	SNARE_syntaxin5
BnaSYP32e	BnaCnng50850D		chrCnn_R	50355361	50357363	-	358	40.14	9.9	269	353	SNARE_syntaxin5
BnaSYP32f	BnaCnng54570D		chrCnn_R	54355955	54357981	+	341	38.22	9.37	252	336	SNARE_syntaxin5
BnaSYP43a	BnaA09g00660D	At5g26980/At3g05710/At4g02195(SYP41/SYP42/SYP43)	chrA09	372690	374798	-	322	36.1	6.64	68	321	COG5325
BnaSYP43b	BnaCnng23310D		chrCnn_R	21848306	21850821	+	322	35.98	6.41	68, 230	293, 287	SNARE_syntaxin16, COG5325
BnaSYP44	BnaA05g31560D		chrA05	21776114	21778132	-	317	35.49	8.66	67	313	COG5325
BnaSYP45	BnaC05g46100D		chrC05	41746976	41749145	-	317	35.56	8.21	67	313	COG5325
BnaSYP46	BnaAnng02730D		chrAnn_R	2228701	2231196	-	318	35.45	7.57	68	314	COG5325
BnaSYP81a	BnaA06g02090D	At1g51740(SYP81)	chrA06	1221922	1227419	-	909	101.04	9.77	6, 222	280, 390	Syntaxin-18_N, SNARE
BnaSYP81b	BnaC06g04900D		chrC06	5601220	5607094	+	911	100.9	9.46	6, 222	280, 390	Syntaxin-18_N, SNARE
BnaSYP82	BnaC06g09010D		chrC06	10667052	10669472	+	424	48.92	5.34	343	376	Syntaxin-18_N
BnaSYP83	BnaC06g09020D		chrC06	10669563	10673077	+	677	74.96	10.23	56	111	SNARE
BnaUSE13	BnaC04g55600D	At3g55600(USE12)	chrC04_R	3216727	3217372	-	95	10.75	4.44	8	93	SNARE
BnaUSE14	BnaC08g26520D		chrC08	27891024	27893071	+	242	26.88	6.53	7	242	Use1
BnaUSE15	BnaC08g26540D		chrC08	27919183	27920927	+	241	26.73	6.8	6	241	Use1
BnaUSE16	BnaA09g35220D	At1g54110(USE11)	chrA09	25680702	25682646	+	238	26.64	6.53	7	238	Use1
BnaSEC20a	BnaA03g37300D	At3g24315(SEC20)	chrA03	18477127	18478847	-	290	32.61	9.42	143	234	Sec20
BnaSEC20b	BnaC03g43610D		chrC03	28710664	28712637	-	248	27.71	8.72	103	194	Sec20
BnaSEC20c	BnaA07g05710D		chrA07	6019173	6021381	+	289	32.35	8.95	144	235	Sec20
BnaSEC20d	BnaC07g08480D		chrC07	13415740	13418040	+	290	32.54	7.6	144	235	Sec20
BnaMEMB13	BnaC04g08330D	At2g36900/At5g50440(MEMB11/12)	chrC04	6261925	6263068	+	226	25.72	10.26	134	199	SNARE_GS27
BnaMEMB14	BnaA05g07500D		chrA05	4047041	4048119	+	226	25.66	10.24	134	199	SNARE_GS27
BnaGOS11a	BnaC05g12110D	At1g15880(GOS11)	chrC05	7043774	7045511	-	225	25.31	8.49	135	200	V-SNARE_C
BnaGOS11b	BnaA06g10560D		chrA06	5591031	5592811	-	225	25.27	8.49	135	200	V-SNARE_C
BnaGOS11c	BnaA08g23720D		chrA08	16783059	16784751	+	220	24.85	8.52	130	195	V-SNARE_C
BnaGOS11d	BnaC08g16810D		chrC08	20666993	20668517	-	220	24.88	7.17	130	195	V-SNARE_C
BnaGOS11e	BnaC08g38620D		chrC08	34792104	34793644	+	224	25.25	7.73	134	199	V-SNARE_C
BnaGOS11f	BnaA09g56530D		chrA09_R	3763774	3765482	+	224	25.28	7.73	134	199	V-SNARE_C
BnaGOS12a	BnaA03g21120D	At2g45200(GOS12)	chrA03	10005810	10007515	-	234	26.08	9.67	145	209	V-SNARE_C
BnaGOS12b	BnaC03g25180D		chrC03	14155477	14157879	-	234	26.02	9.67	145	209	V-SNARE_C
BnaGOS12c	BnaC04g50160D		chrC04	47933413	47935497	-	236	26.09	9.42	147	211	V-SNARE_C
BnaGOS12d	BnaAnng30560D		chrAnn_R	34913110	34915094	+	236	26.1	9.42	147	211	V-SNARE_C
BnaVTI11a	BnaA04g09380D	At5g39510/At5g39630(VTI11/VTI14)	chrA04	8416636	8418470	+	221	24.74	10.38	12, 127	90, 188	V-SNARE, SNARE_Vti1
BnaVTI11b	BnaA04g09440D		chrA04	8428898	8429286	+	92	10.23	11.66	4	59	SNARE
BnaVTI11c	BnaC04g31610D		chrC04	33401654	33403360	+	221	24.73	10.38	12, 127	90, 188	V-SNARE, SNARE_Vti1
BnaVTI11d	BnaC06g12580D		chrC06	15115209	15116665	-	221	24.64	10.42	12, 127	90, 188	V-SNARE, SNARE_Vti1
BnaVTI11e	BnaA07g14720D		chrA07	12914464	12921009	+	1644	184.07	5.56	1435, 1550	1513, 1611	V-SNARE, SNARE_Vti1
BnaVTI11f	BnaC09g16370D		chrC09	13436514	13436899	-	92	10.24	11.84	5	59	SNARE
BnaVTI12a	BnaA02g14320D	At3g29100(VTI13)	chrA02	8042492	8044013	+	222	25.13	9.11	12128	91, 188	V-SNARE, SNARE_Vti1
BnaVTI12b	BnaC02g19220D		chrC02	15468897	15470211	+	222	25.17	9.11	12, 128	91, 188	V-SNARE, SNARE_Vti1
BnaVTI12c	BnaC05g40940D	At1g26670(VTI12)	chrC05	38889071	38890774	-	139	16.02	10.39	23, 100	60, 131	V-SNARE, SNARE
BnaVTI12d	BnaC06g20330D		chrC06	22381086	22381692	-	129	14.84	9.78	1, 81	36, 120	V-SNARE, V-SNARE_C
BnaVTI12e	BnaC07g12350D		chrC07	17865912	17867672	+	222	25.14	8.47	12, 129	91, 188	V-SNARE, SNARE_Vti1
BnaVTI12f	BnaA07g09410D		chrA07	9238306	9239650	-	222	25.14	8.47	12, 129	91, 188	V-SNARE, SNARE_Vti1
BnaVTI13a	BnaA09g02560D		chrA09	1307902	1309529	-	221	24.97	10.17	12, 127	90, 187	V-SNARE, SNARE_Vti1
BnaVTI13b	BnaC09g02020D		chrC09	1111364	1112971	-	221	24.99	10.17	12, 127	90, 187	V-SNARE, SNARE_Vti1
BnaNPSN11a	BnaA03g16130D	At2g35190(NPSN11)	chrA03	7485863	7488263	+	262	29.59	6.8	140	204	SNARE_SNAP25N_23N_29N_SEC9N
BnaNPSN11b	BnaC03g71990D		chrC03_R	470054	472397	-	262	29.59	6.8	5, 140	113, 204	SNARE_SNAP25N_23N_29N_SEC9N, Smc
BnaNPSN11c	BnaC04g10150D		chrC04	7808590	7810826	-	264	29.62	5.94	15, 144	242, 206	SNARE_SNAP25N_23N_29N_SEC9N, COG5325
BnaNPSN11d	BnaA05g08760D		chrA05	4843301	4845125	-	264	29.6	6.55	142	206	SNARE_SNAP25N_23N_29N_SEC9N
BnaNPSN11e	BnaAnng15710D		chrAnn_R	16714387	16716742	-	262	29.52	6.8	140	204	SNARE_SNAP25N_23N_29N_SEC9N
BnaNPSN12a	BnaA03g34530D	At1g48240/At3g17440(NPSN12/NPSN13）	chrA03	16798759	16801055	-	271	30.69	8.46	145	207	SNARE_SNAP25N_23N_29N_SEC9N
BnaNPSN12b	BnaC03g39990D		chrC03	24964141	24966463	-	271	30.62	8.45	145	207	SNARE_SNAP25N_23N_29N_SEC9N
BnaNPSN12c	BnaA06g40480D		chrA06_R	2067416	2068979	-	128	14.43	5.67	76	118	SNARE
BnaNPSN12d	BnaA08g03440D		chrA08	2800516	2801655	+	153	17.2	8.99	87	145	SNARE_SNAP25N_23N_29N_SEC9N
BnaNPSN12e	BnaC08g03740D		chrC08	3797182	3798826	+	227	25.32	4.75	117	174	SNARE
BnaNPSN13a	BnaA05g22740D		chrA05	17250446	17252786	+	271	30.58	8.05	145	207	SNARE_SNAP25N_23N_29N_SEC9N
BnaNPSN13b	BnaCnng50640D		chrCnn_R	50192252	50194693	-	271	30.65	8.31	145	207	SNARE_SNAP25N_23N_29N_SEC9N
BnaNPSN13c	BnaA01g36970D		chrA01_R	2408406	2410798	-	271	30.63	7.51	145	207	SNARE_SNAP25N_23N_29N_SEC9N
BnaNPSN13d	BnaCnng16780D		chrCnn_R	15779447	15781881	-	271	30.63	8.06	150	207	SNARE_SNAP25N_23N_29N_SEC9N
BnaSYN61a	BnaA07g36570D	At1g27700(SYN61)	chrA07_R	552423	553893	+	287	33.16	7.27	19	106	Syntaxin-6_N
BnaSYN61b	BnaC07g11650D		chrC07	17205158	17206627	-	290	33.25	6.72	19	104	Syntaxin-6_N
BnaSYN61c	BnaA08g18800D		chrA08	14615520	14616967	+	288	32.99	7.5	19	101	Syntaxin-6_N
BnaSYN61d	BnaCnng57150D		chrCnn_R	56933998	56935737	-	292	33.46	8.32	19	101	Syntaxin-6_N
BnaSYN62a	BnaA07g01630D	AT2g18860(SYN62)	chrA07	1269916	1272571	+	272	30.98	5.1	21	98	Syntaxin-6_N
BnaSYN62b	BnaC07g02930D		chrC07	3740736	3743382	-	275	31.25	5.24	24	101	Syntaxin-6_N
BnaSYN63a	BnaA01g06780D	AT4g30240(SYN63)	chrA01	3141839	3143714	+	279	32.03	6.17	21	105	Syntaxin-6_N
BnaSYN63b	BnaC01g08170D		chrC01	4328340	4330234	+	299	34.31	5.66	21	105	Syntaxin-6_N
BnaSYN63c	BnaC03g21260D		chrC03	11490971	11493136	-	359	41.81	9.96	21	106	Syntaxin-6_N
BnaSYN63d	BnaC03g68000D		chrC03	57598048	57599813	+	281	32.84	6.68	21	106	Syntaxin-6_N
BnaSYN63e	BnaA08g13120D		chrA08	11426264	11428119	+	281	32.77	5.82	21	105	Syntaxin-6_N
BnaSYP51a	BnaC05g12340D	At1g16240(SYP51)	chrC05	7135475	7136909	-	232	26.11	9.15	139, 172	196, 223	SNARE_Qc, SNARE
BnaSYP51b	BnaA06g10830D		chrA06	5673050	5674355	-	232	26.06	9.15	139, 172	196, 223	SNARE_Qc, SNARE
BnaSYP51c	BnaC08g38470D		chrC08	34742588	34744179	+	233	26.23	9.15	140, 173	197, 224	SNARE_Qc, SNARE
BnaSYP51d	BnaA09g56390D		chrA09_R	3719395	3720924	+	233	26.19	9.15	140, 173	197, 224	SNARE_Qc, SNARE
BnaSYP52a	BnaA02g19290D	At1g79590(SYP52)	chrA02	11990975	11992749	+	234	26.1	9.14	141, 174	198, 225	SNARE_Qc, SNARE
BnaSYP52b	BnaC06g39950D		chrC06	36845077	36847049	+	233	26	9.14	140, 173	197, 224	SNARE_Qc, SNARE
BnaSYP52c	BnaA07g35020D		chrA07	23690615	23694691	+	526	59.13	9.66	140, 173	197, 224	SNARE_Qc, SNARE
BnaSYP52d	BnaAnng27700D		chrAnn_R	31702524	31704139	-	236	26.28	9.14	145, 176	200, 227	SNARE_Qc, SNARE
BnaSYP61a	BnaC03g58730D	At1g28490(SYP61/OSM1)	chrC03	48062837	48066354	+	427	48.24	9.42	14, 156, 255	99, 211, 378	Syntaxin-6_N, SNARE_Qc, OPA3
BnaSYP61b	BnaC05g21920D		chrC05	15728858	15730825	+	245	27.54	4.76	14, 156, 189	99, 212, 240	Syntaxin-6_N, SNARE_Qc, SNARE
BnaSYP61c	BnaA07g08320D		chrA07	8475522	8477185	-	245	27.58	4.86	14, 156, 189	99, 212, 240	Syntaxin-6_N, SNARE_Qc, SNARE
BnaSYP61d	BnaC07g10300D		chrC07	15774221	15775876	-	245	27.58	5.08	14, 156, 189	99, 212, 240	Syntaxin-6_N, SNARE_Qc, SNARE
BnaSYP61e	BnaA08g18280D		chrA08	14315872	14320149	-	441	49.62	8.74	14, 156, 262	99, 212, 385	Syntaxin-6_N, SNARE_Qc, OPA3
BnaSYP61f	BnaA09g27220D		chrA09	20356881	20358917	-	245	27.57	4.77	14, 156, 189	99, 212, 240	Syntaxin-6_N, SNARE_Qc, SNARE
BnaSYP71a	BnaA01g32080D	At3g09740(SYP71)	chrA01	21674776	21676896	-	265	29.8	4.84	181, 210	234, 260	SNARE_Qc, SNARE
BnaSYP71b	BnaC01g38990D		chrC01	37802610	37804810	-	265	29.75	4.83	181, 210	234, 260	SNARE_Qc, SNARE
BnaSYP71c	BnaA05g28800D		chrA05	20346755	20348752	-	268	30.12	4.91	181, 210	234, 260	SNARE_Qc, SNARE
BnaSYP71d	BnaC05g30860D		chrC05	29943152	29944461	+	193	21.57	4.85	137	166	SNARE_Qc
BnaSYP71e	BnaC05g43270D	At3g45280(SYP72)	chrC05	40232965	40235018	-	266	29.83	4.91	182, 211	235, 261	SNARE_Qc, SNARE
BnaSYP72a	BnaC03g55260D		chrC03	44199599	44200344	-	79	8.87	5.02	10	56	SNARE
BnaSYP72b	BnaA06g38790D	At3g61450(SYP73)	chrA06_R	885669	887421	-	290	32.87	4.9	192	246	SNARE_Qc
BnaSYP73a	BnaC08g31380D		chrC08	30772195	30773720	+	267	30.3	5.03	182	236	SNARE_Qc
BnaSYP73b	BnaA09g39190D		chrA09	27801685	27803935	+	270	30.77	5.03	182	236	SNARE_Qc
BnaBET11a	BnaA08g05320D	At3g58170(BET11)	chrA08	5307355	5308879	+	183	21.25	10.18	89	146	SNARE_Bet1
BnaBET11b	BnaC08g09580D		chrC08	14412721	14414617	+	132	15.39	9.64	38	95	SNARE_Bet1
BnaBET11c	BnaC08g29100D		chrC08	29474946	29476617	-	122	13.93	6.81	35	93	SNARE_Bet1
BnaBET11d	BnaA09g37300D		chrA09	26859899	26861551	-	132	14.99	6.8	45	103	SNARE_Bet1
BnaBET13	BnaC06g16360D	At4g14455(BET12)	chrC06	19353620	19354895	-	124	14.02	6.26	37	95	SNARE_Bet1
BnaBET14	BnaA07g17650D		chrA07	14717320	14718764	-	136	15.48	5.26	49	107	SNARE_Bet1
BnaSFT13	BnaC03g58880D	At1g29060/At4g14600(SFT11/12)	chrC03	48156290	48157975	+	137	15.34	9.93	48	103	SNARE_Qc
BnaSFT14	BnaA07g36490D		chrA07_R	481100	482509	+	129	14.71	9.75	40	95	SNARE_Qc
BnaSFT15	BnaC07g10140D		chrC07	15588488	15589942	-	138	15.43	9.63	49	104	SNARE_Qc
BnaSFT16	BnaA08g18180D		chrA08	14263104	14264808	-	137	15.4	9.97	48	103	SNARE_Qc
BnaSNAP23	BnaC08g25610D	At5g61210/At5g07880/At1g13890(SNAP33/29/30)	chrC08	27291365	27293496	+	207	23.31	8.91	58, 155	86, 187	SNARE, SNARE
BnaSNAP29	BnaA09g45980D		chrA09	31325364	31326918	-	266	29.15	6.17	70, 204	134, 262	SNARE_SNAP25N_23N_29N_SEC9N, SNARE_Qc
BnaSNAP30	BnaC08g40050D		chrC08	35434883	35436425	-	266	29.15	6.17	70, 204	134, 262	SNARE_SNAP25N_23N_29N_SEC9N, SNARE_Qc
BnaSNAP31a	BnaC02g42100D		chrC02	44873793	44875533	+	278	31.23	6.81	83, 216	146, 275	SNARE_SNAP25N_23N_29N_SEC9N, SNARE_Qc
BnaSNAP31b	BnaAnng06850D		chrAnn_R	6827573	6829456	+	279	31.31	7.43	83, 216	146, 275	SNARE_SNAP25N_23N_29N_SEC9N, SNARE_Qc
BnaSNAP32	BnaA03g02260D		chrA03	1042724	1043926	-	293	32.77	6.89	96, 231	159, 289	SNARE_SNAP25N_23N_29N_SEC9N, SNARE_Qc
BnaSNAP34a	BnaA03g40020D		chrA03	19999271	20001084	+	306	34.35	7.87	110, 244	173, 302	SNARE_SNAP25N_23N_29N_SEC9N, SNARE_Qc
BnaSNAP34b	BnaC07g31080D		chrC07	35312526	35314588	+	304	34.13	8.45	108, 242	171, 300	SNARE_SNAP25N_23N_29N_SEC9N, SNARE_Qc
BnaSNAP38	BnaA10g23370D		chrA10	15450249	15451865	+	342	38.85	8.62	145, 280	208, 338	SNARE_SNAP25N_23N_29N_SEC9N, SNARE_Qc
BnaSNAP39	BnaC09g48020D		chrC09	47043947	47046099	+	350	39.77	9.69	154, 288	217, 346	SNARE_SNAP25N_23N_29N_SEC9N, SNARE_Qc
BnaSEC221a	BnaC05g09870D	At1g11890(SEC221)	chrC05	5500626	5502334	-	218	25.33	9.4	3, 133	127, 196	Longin, R-SNARE_SEC22
BnaSEC221b	BnaA06g08500D		chrA06	4601094	4602942	-	218	25.33	9.4	3, 133	127, 196	Longin, Synaptobrevin
BnaSEC221c	BnaA08g25060D		chrA08	17344672	17346286	-	218	25.34	9.4	3, 133	127, 196	Longin, R-SNARE_SEC22
BnaSEC221d	BnaC08g15150D		chrC08	19671958	19673621	+	218	25.34	9.4	3, 133	127, 196	Longin, R-SNARE_SEC22
BnaSEC222a	BnaA03g12680D		chrA03	5783839	5784812	+	226	26.5	9.38	5	130	Longin
BnaSEC222b	BnaC03g15560D		chrC03	7785472	7786444	+	219	25.64	9.24	5	130	Longin
BnaSEC223	BnaC01g34310D		chrC01	33463360	33465425	-	485	55.36	5.77	3, 171	115, 257	Longin, Elongin_A,
BnaSEC224	BnaC08g41760D	At5g52270(SEC222)	chrC08	36226382	36227859	-	218	25.34	9.4	3, 133	127, 196	Longin, R-SNARE_SEC22
BnaSEC225	BnaA09g47480D		chrA09	31996360	31998434	-	232	26.9	9.56	3, 133	127, 196	Longin, R-SNARE_SEC22
BnaTYN11a	BnaC02g02250D	At5g05570(TYN11)	chrC02	998828	1005513	-	1100	120.51	5.18	26, 1036	323, 1093	Longin, R-SNARE_SEC22
BnaTYN11b	BnaC09g49850D		chrC09	48009004	48015516	-	1083	117.94	5.5	35, 445, 1019	305, 791, 1076	WD40, WD40, R-SNARE_STXBP5_6
BnaTYN11c	BnaA10g24920D		chrA10	16173271	16180035	-	1088	118.45	5.37	1, 28, 450, 1024	198, 326, 790, 1081	SNC1, WD40, WD40, R-SNARE_STXBP5_6
BnaTYN11d	BnaAnng01390D		chrAnn_R	836165	842875	+	1096	120.06	5.1	31, 491, 1032	295, 759, 1089	WD40, WD40, R-SNARE_STXBP5_6
BnaTYN12a	BnaA03g53420D	At4g35560(TYN12)	chrA03	28028420	28033963	+	1034	113.52	7.41	45, 488, 966	284, 810, 1026	WD40, Lgl_C, R-SNARE_STXBP5_6
BnaTYN12b	BnaC05g26400D		chrC05	22434658	22435112	-	101	11.9	10.53	36	71	SNARE
BnaTYN12c	BnaA07g07530D		chrA07	7827842	7828862	+	133	15.7	10.15	80	121	R-SNARE_STXBP5_6
BnaTYN12d	BnaC07g45690D		chrC07	43631051	43637467	+	1030	113.02	7.43	45, 191, 484, 962	280, 600, 806, 1022	WD40, WD40, R-SNARE_STXBP5_6, Lgl_C
BnaYKT61a	BnaA02g07910D	At5g58060(YKT61)	chrA02	3747499	3749399	-	199	22.46	7.55	1	198	SNC1
BnaYKT61b	BnaC02g11000D		chrC02	6387367	6389315	-	199	22.47	7.55	1	198	SNC1
BnaYKT61c	BnaC03g12420D		chrC03	6003649	6004558	-	80	9.02	4.64	21	67	SNARE
BnaYKT61d	BnaA05g25020D		chrA05	18599216	18600383	-	108	12.52	7.53	25	64	SNARE
BnaYKT61e	BnaC09g33590D		chrC09	36876504	36878504	+	199	22.44	7.55	1	198	SNC1
BnaYKT61f	BnaA10g29290D		chrA10_R	1648271	1649946	-	199	22.44	7.55	1	198	SNC1
BnaYKT63	BnaA02g07810D	At5g58180(YKT62)	chrA02	3702096	3703284	-	199	22.71	8.2	1	198	SNC1
BnaYKT64	BnaC02g10880D		chrC02	6296974	6298141	-	199	22.77	8.6	1, 137	198, 197	SNC1, SNARE
BnaVAMP711a	BnaA08g30600D	At4g32150/At2g25340/At5g11150(VAMP711/VAMP712/VAMP713)	chrA08_R	1606092	1607737	-	219	25.13	9.59	4, 123	118, 189	Longin, Synaptobrevin
BnaVAMP711b	BnaA01g04780D		chrA01	2231491	2232692	+	220	25.21	9.39	4, 124	119, 212	Longin, Synaptobrevin
BnaVAMP711c	BnaC01g06320D		chrC01	3324976	3326301	+	220	25.26	9.39	4, 124	119, 212	Longin, Synaptobrevin
BnaVAMP713a	BnaC09g45410D		chrC09	45775167	45776600	+	221	25.13	9.57	4, 124	119, 212	Longin, Synaptobrevin
BnaVAMP713b	BnaA10g21300D		chrA10	14691485	14693087	+	221	25.19	9.35	4, 124	119, 212	Longin, Synaptobrevin
BnaVAMP714a	BnaA03g08500D	At5g22360(VAMP714)	chrA03	3847868	3849303	-	221	25.24	8.98	4, 124	119, 212	Longin, Synaptobrevin
BnaVAMP714b	BnaC03g10830D		chrC03	5204449	5205933	-	221	25.2	8.98	4, 124	119, 212	Longin, Synaptobrevin
BnaVAMP715	BnaA02g05590D		chrA02	2569927	2571416	-	221	25.25	8.98	4, 124	119, 212	Longin, Synaptobrevin
BnaVAMP721a	BnaC08g00950D	At1g04750(VAMP721)	chrC08	679227	680587	-	219	24.74	9	7, 127	121, 195	Longin, Synaptobrevin
BnaVAMP721b	BnaA08g28050D		chrA08	18520844	18522283	-	219	24.71	9	7, 127	121, 195	Longin, Synaptobrevin
BnaVAMP721c	BnaC08g43980D		chrC08	37457544	37459458	-	220	24.77	9	8, 128	122, 216	Longin, Synaptobrevin
BnaVAMP721d	BnaA09g50530D		chrA09	33396443	33397976	+	220	24.79	9	8, 128	122, 196	Longin, Synaptobrevin
BnaVAMP721e	BnaA10g02890D		chrA10	1493937	1495706	-	220	24.9	9	8, 128	122, 196	Longin, Synaptobrevin
BnaVAMP721f	BnaC05g02770D		chrC05	1353150	1354804	-	220	24.91	9	8, 128	122, 196	Longin, Synaptobrevin
BnaVAMP722/3a	BnaA03g15280D	At2g33120/At2g32670(VAMP722/VAPM723)	chrA03	7092094	7093550	-	222	24.98	9.21	8, 128	122, 196	Longin, Synaptobrevin
BnaVAMP722/3b	BnaC03g18460D		chrC03	9464803	9466720	-	222	24.99	9.21	8, 128	122, 196	Longin, Synaptobrevin
BnaVAMP722/3c	BnaA04g19170D		chrA04	15198241	15200257	-	219	24.61	8.97	7, 127	121, 195	Longin, Synaptobrevin
BnaVAMP722/3d	BnaC04g11490D		chrC04	8985727	8987506	+	223	25.15	9.21	9, 129	123, 197	Longin, Synaptobrevin
BnaVAMP722/3e	BnaC04g43540D		chrC04	43894335	43895955	-	167	19.01	9.51	1, 75	69, 143	Longin, Synaptobrevin
BnaVAMP722/3f	BnaA05g10490D		chrA05	5741423	5743116	+	223	25.16	9.21	9, 129	123, 197	Longin, Synaptobrevin
BnaVAMP724/6/8a	BnaA03g14990D	At1g04760/At2g33110/At3g24890(VAMP724/VAM726/VAM728)	chrA03	6914267	6916847	+	220	24.95	9.36	7, 127	121, 200	Longin, Synaptobrevin
BnaVAMP724/6/8b	BnaC03g18010D		chrC03	9234625	9234960	+	86	9.76	8.31	7	64	Longin
BnaVAMP724/6/8c	BnaC03g18020D		chrC03	9235123	9236129	+	176	20.11	9.53	20, 83	77, 156	Longin, Synaptobrevin
BnaVAMP724/6/8d	BnaA04g18940D		chrA04	15034458	15035955	+	220	24.9	9.36	7, 127	121, 200	Longin, Synaptobrevin
BnaVAMP724/6/8e	BnaA04g18960D		chrA04	15040045	15040841	+	144	16.43	9.91	50	123	Synaptobrevin
BnaVAMP724/6/8f	BnaC04g12180D		chrC04	9482706	9484306	-	220	24.98	9.53	7, 127	121, 195	Longin, Synaptobrevin
BnaVAMP724/6/8g	BnaC04g43180D		chrC04	43546409	43547921	+	220	24.97	9.18	7, 127	121, 200	Longin, Synaptobrevin
BnaVAMP724/6/8h	BnaC04g43220D		chrC04	43562236	43562926	+	72	8.37	4.82	21	70	Synaptobrevin
BnaVAMP724/6/8i	BnaC04g43550D		chrC04	43896117	43896585	-	107	12.05	8.95	7	83	Longin
BnaVAMP724/6/8j	BnaAnng16140D		chrAnn_R	17237235	17238314	-	178	20.38	9.88	21, 85	79, 153	Longin, Synaptobrevin
BnaVAMP724/6/8k	BnaAnng16150D		chrAnn_R	17238390	17238700	-	74	8.5	6.49	7	63	Longin
BnaVAMP725a	BnaA08g05870D	At4g15780(VAMP725)	chrA08	5766033	5768531	-	202	23.09	9.7	45, 108	101, 196	Longin, Synaptobrevin
BnaVAMP725b	BnaA01g18380D		chrA01	9860661	9862844	+	222	25.22	9.12	7, 128	121, 196	Longin, Synaptobrevin
BnaVAMP725c	BnaC01g22290D		chrC01	15732455	15734622	+	222	25.14	9.31	7, 128	121, 196	Longin, Synaptobrevin
BnaVAMP727a	BnaA04g04170D	At3g54300(VAMP727)	chrA04	3058964	3061220	+	242	27.65	6.36	8, 148	142, 236	Longin, Synaptobrevin
BnaVAMP727b	BnaC04g26360D		chrC04	27756415	27758554	+	199	22.94	9.32	8, 105	99, 193	Longin, Synaptobrevin
BnaVAMP727c	BnaC06g15130D		chrC06	17890978	17893229	-	240	27.28	6.14	7, 146	140, 234	Longin, Synaptobrevin
BnaVAMP727d	BnaA07g16340D		chrA07	13857812	13859957	-	241	27.4	6.04	7, 147	141, 235	Longin, Synaptobrevin
BnaVAMP727e	BnaC08g25130D		chrC08	26983497	26985751	-	241	27.53	5.69	7, 147	141, 235	Longin, Synaptobrevin
BnaVAMP727f	BnaA09g34230D		chrA09	25119130	25121545	-	240	27.4	6.51	7, 146	140, 234	Longin, Synaptobrevin
Data obtained from Brassica napus Genome Resources.Gene prefixes represent: ID: identify; chrAnn_R: chr_Ann_random; aa: amino acid; pI: Isoelectric point; Mw: molecular weight;

## Sheet: S2
Table S2 Conserved Domains of SNAREs in Arasisdops Thaliana predicted by CDD-Batch.
Query	Hit type	PSSM-ID	From	To	E-Value	Bitscore	Accession	Short name	Incomplete	Superfamily
Q#1 - >AT1G08560 SYP111/KNOLLE	specific	334261	45	247	4.78156e-69	213.147	pfam00804	Syntaxin	-	cl38013
Q#1 - >AT1G08560 SYP111/KNOLLE	specific	336200	248	286	7.49154e-09	50.8778	pfam05739	SNARE	C	cl22856
Q#2 - >AT2G18260 SYP112	specific	334261	47	245	1.8374e-66	206.213	pfam00804	Syntaxin	-	cl38013
Q#2 - >AT2G18260 SYP112	superfamily	354962	214	279	1.92112e-09	52.7423	cl22856	SNARE superfamily	-	-
Q#3 - >AT3G11820 SYP121	specific	334261	44	249	1.44891e-87	261.682	pfam00804	Syntaxin	-	cl38013
Q#3 - >AT3G11820 SYP121	superfamily	354962	217	283	4.38155e-12	60.4463	cl22856	SNARE superfamily	-	-
Q#4 - >AT3G52400 SYP122	specific	334261	43	248	1.02262e-82	248.97	pfam00804	Syntaxin	-	cl38013
Q#4 - >AT3G52400 SYP122	superfamily	354962	216	282	7.4451e-12	60.0611	cl22856	SNARE superfamily	-	-
Q#5 - >AT4G03330 SYP123	specific	334261	36	241	1.322e-85	255.134	pfam00804	Syntaxin	-	cl38013
Q#5 - >AT4G03330 SYP123	superfamily	354962	209	275	1.54575e-10	55.8239	cl22856	SNARE superfamily	-	-
Q#6 - >AT1G61290 SYP124	specific	334261	33	238	1.53589e-81	244.733	pfam00804	Syntaxin	-	cl38013
Q#6 - >AT1G61290 SYP124	superfamily	354962	206	272	1.00822e-12	61.987	cl22856	SNARE superfamily	-	-
Q#7 - >AT1G11250 SYP125	specific	334261	28	233	3.19281e-81	243.578	pfam00804	Syntaxin	-	cl38013
Q#7 - >AT1G11250 SYP125	superfamily	354962	201	267	1.00847e-12	61.987	cl22856	SNARE superfamily	-	-
Q#8 - >AT3G03800 SYP131	specific	334261	35	240	4.02768e-81	243.578	pfam00804	Syntaxin	-	cl38013
Q#8 - >AT3G03800 SYP131	superfamily	354962	208	274	9.98214e-14	64.6834	cl22856	SNARE superfamily	-	-
Q#9 - >AT5G08080 SYP132	specific	334261	34	250	1.59575e-68	211.991	pfam00804	Syntaxin	-	cl38013
Q#9 - >AT5G08080 SYP132	superfamily	354962	218	284	3.34081e-14	66.2242	cl22856	SNARE superfamily	-	-
Q#10 - >AT5G16830 SYP21	specific	238105	27	164	7.08103e-27	101.977	cd00179	SynN	-	cl29093
Q#10 - >AT5G16830 SYP21	specific	277193	189	247	2.99436e-18	76.3985	cd15840	SNARE_Qa	-	cl22856
Q#11 - >AT5G46860 VAM3	specific	339257	28	128	1.9118e-29	106.568	pfam14523	Syntaxin_2	-	cl29093
Q#11 - >AT5G46860 VAM3	specific	277193	178	236	4.04083e-21	83.7172	cd15840	SNARE_Qa	-	cl22856
Q#12 - >AT4G17730 SYP23	specific	339257	33	133	5.42409e-30	108.109	pfam14523	Syntaxin_2	-	cl29093
Q#12 - >AT4G17730 SYP23	specific	277193	204	245	8.15333e-12	58.6793	cd15840	SNARE_Qa	N	cl22856
Q#13 - >AT5G05760 SYP31	specific	277197	247	331	3.76787e-36	125.317	cd15844	SNARE_syntaxin5	-	cl22856
Q#14 - >AT3G24350 SYP32	specific	277197	272	356	2.5291e-42	142.266	cd15844	SNARE_syntaxin5	-	cl22856
Q#15 - >AT5G26980 SYP41	superfamily	227635	73	318	2.29686e-31	118.79	cl34983	COG5325 superfamily	-	-
Q#16 - >AT4G02195 SYP42	superfamily	227635	71	320	1.20283e-28	111.471	cl34983	COG5325 superfamily	-	-
Q#17 - >AT3G05710 SYP43	superfamily	227635	81	327	3.11821e-32	121.101	cl34983	COG5325 superfamily	-	-
Q#18 - >AT1G16240 SYP51	specific	277194	139	196	8.26061e-17	71.4356	cd15841	SNARE_Qc	-	cl22856
Q#18 - >AT1G16240 SYP51	specific	336200	172	223	1.64443e-07	46.2554	pfam05739	SNARE	-	cl22856
Q#19 - >AT1G79590 SYP52	specific	277194	140	197	9.55055e-17	71.4356	cd15841	SNARE_Qc	-	cl22856
Q#19 - >AT1G79590 SYP52	specific	336200	173	224	1.27586e-07	46.6406	pfam05739	SNARE	-	cl22856
Q#20 - >AT1G28490 SYP61	specific	337321	14	99	3.37754e-27	99.9439	pfam09177	Syntaxin-6_N	-	cl07702
Q#20 - >AT1G28490 SYP61	specific	277194	156	212	6.31321e-17	72.206	cd15841	SNARE_Qc	-	cl22856
Q#20 - >AT1G28490 SYP61	specific	336200	189	240	9.26765e-09	50.1074	pfam05739	SNARE	-	cl22856
Q#21 - >AT3G09740 SYP71	specific	277194	177	232	2.53738e-15	68.354	cd15841	SNARE_Qc	-	cl22856
Q#21 - >AT3G09740 SYP71	specific	336200	208	258	7.9095e-09	50.4926	pfam05739	SNARE	-	cl22856
Q#22 - >AT3G45280 SYP72	specific	277194	176	234	2.02593e-14	66.0428	cd15841	SNARE_Qc	-	cl22856
Q#23 - >AT3G61450 SYP73	specific	277194	175	230	6.9417e-15	67.1984	cd15841	SNARE_Qc	-	cl22856
Q#24 - >AT1G51740 SYP81	specific	337765	6	86	2.02341e-18	78.1352	pfam10496	Syntaxin-18_N	-	cl11136
Q#24 - >AT1G51740 SYP81	superfamily	354962	222	280	1.04848e-10	56.1519	cl22856	SNARE superfamily	-	-
Q#25 - >AT5G61210 AtSNAP33	specific	277214	104	167	3.26245e-19	79.5395	cd15861	SNARE_SNAP25N_23N_29N_SEC9N	-	cl22856
Q#25 - >AT5G61210 AtSNAP33	specific	277194	238	296	5.57577e-15	67.9688	cd15841	SNARE_Qc	-	cl22856
Q#26 - >AT5G07880 AtSNAP29	specific	277214	60	122	2.1484e-13	62.9759	cd15861	SNARE_SNAP25N_23N_29N_SEC9N	-	cl22856
Q#26 - >AT5G07880 AtSNAP29	superfamily	354962	193	246	2.69741e-12	60.0561	cl22856	SNARE superfamily	-	-
Q#27 - >AT1G13890 AtSNAP30	specific	277214	68	132	7.75088e-22	85.3175	cd15861	SNARE_SNAP25N_23N_29N_SEC9N	-	cl22856
Q#27 - >AT1G13890 AtSNAP30	specific	277194	201	250	3.77493e-12	59.4944	cd15841	SNARE_Qc	-	cl22856
Q#28 - >AT5G39510 AtSGR4	specific	309928	12	90	4.11397e-24	91.1136	pfam05008	V-SNARE	-	cl09350
Q#28 - >AT5G39510 AtSGR4	specific	277215	127	187	1.06579e-21	84.1176	cd15862	SNARE_Vti1	-	cl22856
Q#29 - >AT1G26670 AtVTI12	specific	309928	12	91	1.34209e-22	86.8764	pfam05008	V-SNARE	-	cl09350
Q#29 - >AT1G26670 AtVTI12	specific	277215	128	188	7.78777e-21	81.8064	cd15862	SNARE_Vti1	-	cl22856
Q#30 - >AT3G29100 AtVTI13	specific	277215	101	162	2.26436e-23	87.5844	cd15862	SNARE_Vti1	-	cl22856
Q#30 - >AT3G29100 AtVTI13	specific	309928	26	64	9.59231e-13	60.6829	pfam05008	V-SNARE	N	cl09350
Q#31 - >AT1G15880 AtGOS11	specific	289148	133	198	2.35756e-15	67.6341	pfam12352	V-SNARE_C	-	cl18053
Q#32 - >AT2G45200 AtGOS12	specific	289148	168	232	1.0615e-14	66.8637	pfam12352	V-SNARE_C	-	cl18053
Q#33 - >AT2G36900 AtMEMB11	specific	277216	133	198	7.40147e-24	89.8949	cd15863	SNARE_GS27	-	cl22856
Q#34 - >AT5G50440 AtMEMB12	specific	277216	127	192	2.05244e-23	88.7393	cd15863	SNARE_GS27	-	cl22856
Q#35 - >AT1G11890 SEC22	specific	341428	3	127	2.85095e-43	141.239	cd14824	Longin	-	cl38905
Q#35 - >AT1G11890 SEC22	specific	277219	133	196	2.15065e-31	109.146	cd15866	R-SNARE_SEC22	-	cl22856
Q#36 - >AT2G35190 AtNPSN11	specific	277214	141	205	6.63485e-18	75.3023	cd15861	SNARE_SNAP25N_23N_29N_SEC9N	-	cl22856
Q#36 - >AT2G35190 AtNPSN11	superfamily	274009	2	206	0.00114861	40.0511	cl37070	SMC_prok_A superfamily	NC	-
Q#37 - >AT1G48240 AtNPSN12	specific	277214	145	207	6.78252e-15	67.2131	cd15861	SNARE_SNAP25N_23N_29N_SEC9N	-	cl22856
Q#38 - >AT3G17440 AtNPSN13	specific	277214	145	207	9.07302e-14	64.5167	cd15861	SNARE_SNAP25N_23N_29N_SEC9N	-	cl22856
Q#39 - >AT5G58060 AtYKT61	specific	277220	159	219	5.74271e-37	123.248	cd15867	R-SNARE_YKT6	-	cl22856
Q#39 - >AT5G58060 AtYKT61	specific	227472	1	220	1.30496e-36	126.774	COG5143	SNC1	-	cl34918
Q#40 - >AT5G58180 AtYKT62	specific	277220	137	197	1.24986e-34	116.699	cd15867	R-SNARE_YKT6	-	cl22856
Q#40 - >AT5G58180 AtYKT62	superfamily	227472	1	196	9.0892e-31	110.981	cl34918	SNC1 superfamily	-	-
Q#41 - >AT4G32150 VAMP711	specific	341428	4	118	1.95299e-35	121.209	cd14824	Longin	-	cl38905
Q#41 - >AT4G32150 VAMP711	specific	334327	123	211	7.17085e-29	103.386	pfam00957	Synaptobrevin	-	cl38020
Q#42 - >AT2G25340 VAMP712	specific	341428	4	118	1.45202e-36	124.29	cd14824	Longin	-	cl38905
Q#42 - >AT2G25340 VAMP712	specific	334327	123	211	6.07704e-27	98.3784	pfam00957	Synaptobrevin	-	cl38020
Q#43 - >AT5G11150 AtVAMP713	specific	334327	124	212	1.2352e-37	126.113	pfam00957	Synaptobrevin	-	cl38020
Q#43 - >AT5G11150 AtVAMP713	specific	341428	4	119	4.93641e-34	117.742	cd14824	Longin	-	cl38905
Q#44 - >AT5G22360 AtVAMP714	specific	334327	124	212	8.8209e-35	118.794	pfam00957	Synaptobrevin	-	cl38020
Q#44 - >AT5G22360 AtVAMP714	specific	341428	4	119	1.41715e-31	111.579	cd14824	Longin	-	cl38905
Q#45 - >AT1G04750 AtVAMP721	specific	341428	7	121	2.70592e-32	113.505	cd14824	Longin	-	cl38905
Q#45 - >AT1G04750 AtVAMP721	specific	334327	127	195	1.95052e-31	109.934	pfam00957	Synaptobrevin	C	cl38020
Q#46 - >AT2G33120 AtVAMP722	specific	334327	135	203	5.24259e-32	111.86	pfam00957	Synaptobrevin	C	cl38020
Q#46 - >AT2G33120 AtVAMP722	specific	341428	7	129	4.69653e-29	105.416	cd14824	Longin	-	cl38905
Q#47 - >AT2G33110 AtVAMP723	specific	341428	7	121	2.36234e-27	100.408	cd14824	Longin	-	cl38905
Q#47 - >AT2G33110 AtVAMP723	specific	334327	127	191	2.33357e-17	73.7256	pfam00957	Synaptobrevin	C	cl38020
Q#48 - >AT4G15780 AtVAMP724	specific	341428	7	121	1.44373e-26	97.3265	cd14824	Longin	-	cl38905
Q#48 - >AT4G15780 AtVAMP724	specific	334327	128	180	7.36382e-17	71.4144	pfam00957	Synaptobrevin	C	cl38020
Q#49 - >AT2G32670 AtVAMP725	specific	341428	72	186	5.00126e-32	114.66	cd14824	Longin	-	cl38905
Q#49 - >AT2G32670 AtVAMP725	specific	334327	192	260	6.12684e-31	110.705	pfam00957	Synaptobrevin	C	cl38020
Q#50 - >AT1G04760 AtVAMP726	specific	334327	127	200	3.01958e-33	114.557	pfam00957	Synaptobrevin	-	cl38020
Q#50 - >AT1G04760 AtVAMP726	specific	341428	7	121	2.18966e-31	111.194	cd14824	Longin	-	cl38905
Q#51 - >AT3G54300 AtVAMP727	specific	334327	146	234	1.44788e-37	126.498	pfam00957	Synaptobrevin	-	cl38020
Q#51 - >AT3G54300 AtVAMP727	specific	341428	7	140	3.29231e-30	108.497	cd14824	Longin	-	cl38905
Q#52 - >AT5G39630 AtVTI14	specific	277215	123	184	4.38991e-18	74.4876	cd15862	SNARE_Vti1	-	cl22856
Q#52 - >AT5G39630 AtVTI14	specific	309928	12	90	7.70067e-15	66.4608	pfam05008	V-SNARE	-	cl09350
Q#53 - >AT3G58170 AtBS14a	specific	277206	35	93	5.69976e-19	74.0762	cd15853	SNARE_Bet1	-	cl22856
Q#54 - >AT4G14455 AtBS14b	specific	277206	36	93	2.21992e-18	72.9206	cd15853	SNARE_Bet1	-	cl22856
Q#55 - >At5g52270	specific	341428	5	130	8.1235e-20	81.1481	cd14824	Longin	-	cl38905
Q#56 - >AT3G24890	superfamily	334327	28	107	1.47717e-11	56.0064	cl38020	Synaptobrevin superfamily	-	-
Q#57 - >At5g05570	specific	277226	1060	1117	8.62371e-23	92.3196	cd15873	R-SNARE_STXBP5_6	-	cl22856
Q#57 - >At5g05570	superfamily	315554	254	317	0.0016284	38.4134	cl14918	ANAPC4_WD40 superfamily	N	-
Q#58 - >At4g35560	specific	277226	983	1042	1.1194e-16	74.9856	cd15873	R-SNARE_STXBP5_6	-	cl22856
Q#58 - >At4g35560	superfamily	312193	499	827	1.18954e-08	58.1186	cl20362	Lgl_C superfamily	-	-
Q#58 - >At4g35560	superfamily	356469	45	264	0.000184733	44.248	cl29593	WD40 superfamily	C	-
Q#59 - >At1g29060	specific	277194	45	100	2.95478e-10	52.1756	cd15841	SNARE_Qc	-	cl22856
Q#60 - >At4g14600	specific	277194	48	103	1.07064e-11	56.0276	cd15841	SNARE_Qc	-	cl22856
Q#61 - >At3g55600	specific	313048	7	240	1.33115e-76	230.977	pfam09753	Use1	-	cl22856
Q#62 - >At1g54110	specific	313048	6	236	1.76423e-67	207.48	pfam09753	Use1	-	cl22856
Q#64 - >AT1G32270	specific	277193	268	325	2.36247e-13	64.0721	cd15840	SNARE_Qa	-	cl22856
Q#64 - >AT1G32270	specific	339257	154	220	6.93246e-09	52.6405	pfam14523	Syntaxin_2	N	cl29093
Q#64 - >AT1G32270	specific	335248	35	137	9.8044e-06	43.8272	pfam03168	LEA_2	-	cl12118

## Sheet: S3
Table S3 Subcellular localizations of BnaSNARE proteins
Gene name	Subcellular localization
	mPLoc-Euk	Plant-mPLoc	CELLO
BnaKNOLLEa	ER	Nuc	Cyt
BnaKNOLLEb	PM, Vacuole	Golgi	Cyt, IM
BnaKNOLLEc	PM	Golgi	OM
BnaKNOLLEd	PM, Cyt, ER	Nuc	Cyt, IM
BnaSYP112a	PM, Nuc	Golgi	Cyt
BnaSYP112b	Extrac, Mit, Nuc,	Golgi, Vacuole,	Cyt
BnaSYP112c	PM	Golgi	Cyt, OM
BnaSYP112d	Vacuole	Vacuole	Cyt
BnaSYP112e	PM, Cyt, ER	Nuc	Cyt
BnaSYP112f	PM	Golgi	Cyt, OM
BnaSYP121a	Vacuole	Vacuole	Cyt, OM
BnaSYP121b	PM, Cyt, ER	Nuc	Cyt, Periplasmic
BnaSYP121c	PM	Golgi,	Cyt, OM
BnaSYP121d	PM	Golgi	Cyt
BnaSYP122a	PM,	Golgi	Cyt
BnaSYP122b	Golgi, Nuc	Golgi,	Cyt
BnaSYP122c	Vacuole	Vacuole	Cyt, OM
BnaSYP122d	PM	Golgi	Cyt
BnaSYP123a	PM, Vacuole,	Golgi,	Cyt, IM
BnaSYP123b	ER,	ER,	Cyt
BnaSYP125a	PM, Nuc,	Golgi, Vacuole,	Cyt
BnaSYP125b	PM,	Golgi,	Cyt, OM
BnaSYP125c	PM,	Golgi,	Cyt, OM
BnaSYP125d	Golgi, Nuc	Golgi,	Cyt
BnaSYP125e	Nuc,	Nuc,	OM
BnaSYP125f	PM, Cyt, ER	Nuc	Cyt
BnaSYP131a	PM, Cyt, ER, Nuc	Nuc,	Cyt, Periplasmic
BnaSYP131b	Vacuole	Vacuole,	Cyt, Periplasmic
BnaSYP131c	PM, Cyt, ER	Nuc,	Cyt
BnaSYP131d	PM,	Golgi,	Cyt, OM
BnaSYP131e	ER	PM, Cell, wall, Chlor	Cyt, Extracular
BnaSYP131f	ER	PM, Chlor,	OM, IM
BnaSYP131g	Mit	Golgi, Nuc	Cyt, Periplasmic
BnaSYP133	PM	Golgi,	Cyt
BnaSYP21a	PM,	Golgi	OM, Cyt
BnaSYP21b	PM, Cyt, ER	Chlor, Mit, Nuc,	InnerMembrane, Cyt
BnaSYP21c	PM, Cyt, ER, Golgi	Nuc,	Periplasmic, Cyt
BnaSYP21d	Vacuole,	Vacuole,	Cyt, OM
BnaSYP21e	PM, Cyt, ER	Nuc	Cyt, Periplasmic
BnaSYP22a	PM	Golgi,	Cyt
BnaSYP22b	PM	Golgi,	Cyt
BnaSYP22c	Nuc,	Golgi, Nuc,	Cyt, OM
BnaSYP22d	Vacuole	Vacuole	Cyt, OM
BnaSYP22e	PM, Cyt, ER	Nuc	Cyt, Periplasmic
BnaSYP24a	Golgi, Nuc	Golgi	OM, Extracular
BnaSYP24b	Cyt, ER	Nuc	Cyt, IM
BnaSYP25	ER	ER	Cyt
BnaSYP26	Vacuole	Vacuole	Cyt
BnaSYP27	PM	Golgi	Cyt
BnaSYP28	Vacuole	Vacuole	Cyt, OM
BnaSYP29	PM	Golgi,	Cyt
BnaSYP31a	PM, Cyt, ER, Golgi, Nuc	Nuc	Periplasmic
BnaSYP31b	Vacuole	Golgi,	OM
BnaSYP31c	Vacuole	Vacuole	Cyt
BnaSYP31d	Vacuole	Vacuole	Cyt
BnaSYP32a	PM	Golgi	Cyt
BnaSYP32b	ER	ER	Cyt
BnaSYP32c	PM	Golgi	Cyt
BnaSYP32d	Vacuole	Vacuole	Cyt
BnaSYP32e	Nuc	Nuc	OM
BnaSYP32f	ER	ER	Cyt
BnaSYP43a	Vacuole	Vacuole	Cyt, OM
BnaSYP43b	Golgi	Golgi	OM, Periplasmic
BnaSYP44	Vacuole	Vacuole	Cyt
BnaSYP45	PM, Cyt, ER	Nuc	Cyt
BnaSYP46	Vacuole	Vacuole	Cyt
BnaSYP81a	Vacuole	Vacuole	Cyt
BnaSYP81b	PM, Cyt, ER	Nuc	Cyt
BnaSYP82	PM, Cyt, ER, Nuc	Nuc	Cyt, OM
BnaSYP83	Vacuole	Vacuole	Cyt, IM
BnaUSE13	PM	Golgi	OM,Cyt
BnaUSE14	PM, Cyt, ER	Nuc	Cyt, Periplasmic
BnaUSE15	Cyt, Mit, Nuc	Golgi, Nuc	Cyt, Periplasmic
BnaUSE16	Nuc	Golgi, Nuc	Cyt, OM
BnaSEC20a	Extrac	PM,	Extracular, Periplasmic
BnaSEC20b	PM, Cyt, ER, Nuc	Nuc	Cyt
BnaSEC20c	Vacuole	Vacuole	Cyt, Periplasmic
BnaSEC20d	Vacuole	Vacuole	Cyt, OM
BnaMEMB13	PM, Cyt, ER	Nuc	Cyt, Periplasmic
BnaMEMB14	Golgi, Nuc	Golgi	Extracular, OM
BnaGOS11a	Vacuole	Vacuole	Cyt, IM
BnaGOS11b	Extrac,	PM, Chlor, Golgi	, IM, Cyt
BnaGOS11c	Vacuole	Vacuole	Cyt, IM
BnaGOS11d	PM, Cyt, ER	Chlor, Mit, Nuc	Cyt, IM
BnaGOS11e	PM, Cyt, ER	Chlor, Cyt, Mit, Nuc	Cyt, IM
BnaGOS11f	Vacuole	Vacuole	Cyt, OM
BnaGOS12a	Cyt,	Nuc	Cyt
BnaGOS12b	PM, Cyt, ER	Nuc	Cyt, Periplasmic
BnaGOS12c	Extrac	Nuc	Cyt
BnaGOS12d	PM, Cyt, ER	Nuc	Cyt
BnaVTI11a	Vacuole	Vacuole	, Cyt, Periplasmic
BnaVTI11b	Nuc	Golgi, Nuc	, Cyt, Periplasmic
BnaVTI11c	Vacuole	Vacuole	OM, Cyt
BnaVTI11d	PM, Cyt, ER	Chlor, Mit, Nuc	Cyt, IM
BnaVTI11e	ER	Nuc	Cyt, Periplasmic
BnaVTI11f	Vacuole	Vacuole	Cyt
BnaVTI12a	Golgi, Nuc	Golgi	OM, Periplasmic
BnaVTI12b	Vacuole	Vacuole	Cyt
BnaVTI12c	Vacuole	Vacuole	Cyt
BnaVTI12d	PM	Golgi	Cyt
BnaVTI12e	Golgi, Nuc	Golgi	Cyt, OM
BnaVTI12f	Vacuole	Golgi	OM, Cyt
BnaVTI13a	Vacuole	Vacuole	Cyt
BnaVTI13b	PM	Golgi	Cyt
BnaNPSN11a	Golgi, Nuc	Golgi	Extracular, Periplasmic
BnaNPSN11b	Cyt, Golgi, Nuc	Golgi, Nuc	Extracular, Periplasmic
BnaNPSN11c	Golgi, Nuc	Golgi, Nuc	Extracular, Cyt
BnaNPSN11d	Golgi, Nuc	Golgi	Cyt, OM
BnaNPSN11e	Cyt, Golgi, Nuc	Golgi, Nuc,	Extracular, Periplasmic
BnaNPSN12a	Golgi, Nuc	Golgi	, Cyt, Periplasmic
BnaNPSN12b	Golgi, Nuc,	Golgi	Periplasmic, Extracular
BnaNPSN12c	ER	Nuc	OM, Cyt
BnaNPSN12d	ER	Nuc	Cyt, OM
BnaNPSN12e	Nuc	Nuc	Cyt, Extracula
BnaNPSN13a	ER	Nuc	Cyt
BnaNPSN13b	ER, Nuc	Nuc	OM, Cyt
BnaNPSN13c	ER	Nuc	Cyt, OM
BnaNPSN13d	Cyt, ER	Nuc	Cyt
BnaSYN61a	Mit,	Golgi, Nuc	Cyt, Periplasmic
BnaSYN61b	Golgi, Nuc	Golgi	Cyt
BnaSYN61c	Nuc	Golgi, Nuc	Cyt, OM
BnaSYN61d	Golgi, Nuc	Golgi	Cyt
BnaSYN62a	Vacuole	Vacuole	Cyt, Extracular
BnaSYN62b	Vacuole	Vacuole	, Periplasmic, Cyt
BnaSYN63a	Vacuole	Vacuole	Cyt
BnaSYN63b	Nuc	Golgi, Nuc	OM, Cyt
BnaSYN63c	Vacuole	Vacuole	Cyt, OM
BnaSYN63d	PM, Cyt, ER	Nuc	Cyt, Periplasmic
BnaSYN63e	Nuc	Golgi, Nuc	Cyt, OM
BnaSYP51a	PM,	Golgi	, IM, Cyt
BnaSYP51b	Cyt, Golgi, Nuc	Golgi	OM, Periplasmic, Extracular
BnaSYP51c	Golgi	Golgi	Cyt, Periplasmic
BnaSYP51d	Golgi, Nuc,	Golgi	Cyt
BnaSYP52a	Vacuole	Vacuole	Cyt
BnaSYP52b	PM	Golgi	Cyt, OM
BnaSYP52c	Cyt	Nuc,	Cyt, OM
BnaSYP52d	PM, Cyt, ER	Nuc	Cyt
BnaSYP61a	Vacuole	Vacuole	Cyt, Periplasmic
BnaSYP61b	PM, Cyt, ER	Nuc	Cyt
BnaSYP61c	Golgi, Nuc	Golgi	Cyt, OM
BnaSYP61d	PM	Golgi,	Cyt
BnaSYP61e	Nuc	Golgi, Nuc	Cyt, Periplasmic
BnaSYP61f	Vacuole	Vacuole	Cyt, OM
BnaSYP71a	PM, Nuc	Golgi, Vacuole	Cyt, IM
BnaSYP71b	Vacuole	Vacuole	Cyt, IM
BnaSYP71c	PM, Vacuole	Golgi	Cyt, IM
BnaSYP71d	PM	Golgi	Cyt
BnaSYP71e	PM, Cyt, ER	Nuc	Cyt
BnaSYP72a	Nuc, Vacuole	Golgi, Nuc	Cyt, Periplasmic
BnaSYP72b	PM	Golgi	Cyt
BnaSYP73a	PM, Cyt, ER	Chlor, Cyt, Mit, Nuc	Cyt, IM
BnaSYP73b	ER	ER	Cyt
BnaBET11a	PM	Golgi	OM, Cyt
BnaBET11b	Vacuole	Vacuole	Cyt
BnaBET11c	PM	Golgi	Cyt
BnaBET11d	ER	ER,	Cyt
BnaBET13	PM, Cyt, ER	Nuc	Cyt
BnaBET14	Vacuole	Vacuole	Cyt
BnaSFT13	PM	Golgi	OM, Cyt
BnaSFT14	Vacuole	Vacuole	OM, Cyt
BnaSFT15	PM, Cyt, ER, Golgi, Nuc	Nuc,	Periplasmic, Cyt
BnaSFT16	Vacuole	Vacuole	Cyt
BnaSNAP23	Vacuole	Vacuole	Cyt, IM
BnaSNAP29	PM, Cyt, ER	Chlor, Nuc	Cyt, IM
BnaSNAP30	Nuc	Golgi, Nuc	Cyt
BnaSNAP31a	PM, Cyt, ER	Nuc	Cyt
BnaSNAP31b	PM, Cyt, ER	Nuc	Cyt
BnaSNAP32	Vacuole,	Vacuole,	Cyt
BnaSNAP34a	Cyt	Nuc	Cyt, Periplasmic
BnaSNAP34b	PM, Cyt, ER	Nuc	InnerMembrane, Cyt
BnaSNAP38	PM, Cyt, ER	Nuc	Cyt
BnaSNAP39	Golgi	Golgi	OM
BnaSEC221a	ER	ER	Cyt, IM
BnaSEC221b	ER	ER	Cyt, IM
BnaSEC221c	ER	ER	Cyt, IM
BnaSEC221d	Extrac	Nuc	Cyt, Periplasmic
BnaSEC222a	ER	ER	Cyt
BnaSEC222b	ER	ER	Cyt
BnaSEC223	ER	ER	Cyt
BnaSEC224	ER	ER	Cyt
BnaSEC225	ER	ER	Cyt
BnaTYN11a	Cyt, Nuc	Nuc	OM
BnaTYN11b	ER	Nuc	Cyt, OM
BnaTYN11c	Nuc	Nuc	Cyt
BnaTYN11d	Nuc	Nuc	OM
BnaTYN12a	Nuc	Nuc	OM
BnaTYN12b	Cyt	-	Periplasmic, Cyt
BnaTYN12c	Nuc	Nuc	OM
BnaTYN12d	PM, Cyt, ER, Nuc	Nuc	OM
BnaYKT61a	Golgi	Golgi	Cyt, Periplasmic
BnaYKT61b	Chlor, Extrac, Mit, Nuc,	Golgi	Cyt, Periplasmic
BnaYKT61c	Golgi	Golgi	Cyt, OM
BnaYKT61d	Golgi	Golgi	OM, Cyt
BnaYKT61e	ER	ER	Cyt
BnaYKT61f	ER	ER	OM, Cyt
BnaYKT63	Golgi	Golgi	OM, Cyt
BnaYKT64	Golgi	Golgi	OM, Cyt
BnaVAMP711a	Golgi	Golgi	OM, Cyt
BnaVAMP711b	Golgi	Golgi	Cyt, OM
BnaVAMP711c	ER	ER	OM, Cyt
BnaVAMP713a	ER	ER	OM, Cyt
BnaVAMP713b	PM, Cyt, ER, Extrac, Nuc	Nuc	Cyt, Periplasmic
BnaVAMP714a	PM, ER, Nuc	Golgi	Cyt, Periplasmic
BnaVAMP714b	PM, Cyt, ER	Nuc	Cyt
BnaVAMP715	Nuc	Golgi	Cyt
BnaVAMP721a	PM, ER, Nuc	Nuc	Cyt
BnaVAMP721b	Nuc	Golgi	Cyt
BnaVAMP721c	Nuc	Golgi, Nuc	Cyt
BnaVAMP721d	Nuc	Nuc	Cyt, Periplasmic
BnaVAMP721e	Nuc	Golgi, Nuc	Cyt
BnaVAMP721f	Nuc	Golgi, Nuc	Cyt, Periplasmic
BnaVAMP722/3a	ER, Nuc	Golgi	Cyt
BnaVAMP722/3b	Nuc	Nuc	Cyt
BnaVAMP722/3c	Golgi	Golgi	Cyt, OM
BnaVAMP722/3d	Nuc	Nuc	Cyt
BnaVAMP722/3e	Golgi, Nuc	Golgi	Cyt
BnaVAMP722/3f	Golgi, Nuc	Golgi	Cyt
BnaVAMP724/6/8a	ER	ER	OM, Cyt
BnaVAMP724/6/8b	Cyt	Nuc	Cyt
BnaVAMP724/6/8c	ER	Nuc	Cyt
BnaVAMP724/6/8d	Nuc	Nuc	OM
BnaVAMP724/6/8e	Nuc	Nuc	Cyt
BnaVAMP724/6/8f	Nuc	Nuc	OM, Periplasmic
BnaVAMP724/6/8g	Cyt, Golgi, Nuc	Golgi	Cyt, Periplasmic, Extracular
BnaVAMP724/6/8h	Golgi, Nuc,	Golgi	Cyt
BnaVAMP724/6/8i	Golgi	Golgi	Cyt, OM
BnaVAMP724/6/8j	Nuc	Nuc	Cyt
BnaVAMP724/6/8k	Mit, Nuc	Chlor, Nuc	Cyt
BnaVAMP725a	Nuc	Golgi, Nuc	Cyt, Periplasmic
BnaVAMP725b	ER	ER	OM, Cyt
BnaVAMP725c	Nuc	Golgi	Cyt
BnaVAMP727a	Golgi,	Golgi, Nuc	Periplasmic, Extracular, Cyt
BnaVAMP727b	Golgi, Nuc,	Golgi	Cyt
BnaVAMP727c	Vacuole	Vacuole	Cyt, OM
BnaVAMP727d	Extrac, Mit, Nuc	Golgi, Vacuole	Cyt
BnaVAMP727e	ER	ER	Cyt
BnaVAMP727f	PM, Cyt, ER, Golgi	Nuc	Periplasmic, Cyt
ER: endoplasmic reticulum; nuc: nucleus; Cyt: cytoplasm; Mit: mitochondrion; Chlor: chloroplast; PM: Plasma Membrane; Extrac: Extracellular; IM: InnerMembrane; OM: OuterMembrane

## Sheet: S4
Table S4 Homologous gene pairs of SNAREs among An and Cn subgenomes of B. napus and their putative orthologs in A. thaliana. A dot (.) is placed where no homolog is identified in the respective genome due to several possible causes (different annotation methods, gene loss, truncation, pseudogenization, matching random scaffolds, transposed). These changes are tracked in the next four columns labe…
B. napus An subgenome		B. napus Cn subgenome		A. thaliana orthologs
ID	Name	ID	Name	ID	Name
BnaA01g04780D	BnaVAMP711b	BnaC01g06320D	BnaVAMP711c	AT4G32150	VAMP711
BnaA01g06780D	BnaSYN63a	BnaC01g08170D	BnaSYN63b	AT4G30240	At4g30240
BnaA09g37300D	BnaBET11d	BnaC08g29100D	BnaBET11c	AT3G58170	BET11
BnaA08g05320D	BnaBET11a	BnaC08g09580D	BnaBET11b	AT4G14455	BET12
BnaA07g17650D	BnaBET14	BnaC06g16360D	BnaBET13	AT3G58170	BET11
BnaA06g10560D	BnaGOS11b	BnaC05g12110D	BnaGOS11a	AT1G15880	GOS11
BnaA08g23720D	BnaGOS11c	BnaC08g16810D	BnaGOS11d	AT1G15880	GOS11
BnaA09g56530D	BnaGOS11f	BnaC08g38620D	BnaGOS11e	AT1G15880	GOS11
BnaA03g21120D	BnaGOS12a	BnaC03g25180D	BnaGOS12b	AT2G45200	GOS12
BnaAnng30560D	BnaGOS12d	BnaC04g50160D	BnaGOS12c	AT2G45200	GOS12
BnaA06g04950D	BnaKNOLLEb	BnaC05g06210D	BnaKNOLLEa	AT1G08560	KNOLLE
BnaA08g26870D	BnaKNOLLEc	BnaC08g13620D	BnaKNOLLEd	AT1G08560	KNOLLE
BnaA05g07500D	BnaMEMB14	BnaC04g08330D	BnaMEMB13	AT2G36900	MEMB11
BnaA03g16130D	BnaNPSN11a	BnaC03g71990D	BnaNPSN11b	AT2G35190	NPSN11
BnaA05g08760D	BnaNPSN11d	BnaC04g10150D	BnaNPSN11c	AT2G35190	NPSN11
BnaA03g34530D	BnaNPSN12a	BnaC03g39990D	BnaNPSN12b	AT3G17440	NPSN13
BnaA08g03440D	BnaNPSN12d	BnaC08g03740D	BnaNPSN12e	AT1G48240	NPSN12
BnaA05g22740D	BnaNPSN13a	.	.	AT3G17440	NPSN13
BnaA01g36970D	BnaNPSN13c	BnaCnng16780D	BnaNPSN13d	AT3G17440	NPSN13
BnaA03g37300D	BnaSEC20a	BnaC03g43610D	BnaSEC20b	AT3G24315	SEC20
BnaA07g05710D	BnaSEC20c	.	.	AT3G24315	SEC20
BnaA06g08500D	BnaSEC221b	BnaC05g09870D	BnaSEC221a	AT1G11890	SEC221
BnaA08g25060D	BnaSEC221c	BnaC08g15150D	BnaSEC221d	AT1G11890	SEC221
BnaA03g12680D	BnaSEC222a	BnaC03g15560D	BnaSEC222b	AT5G52270	SEC222
BnaA09g47480D	BnaSEC225	BnaC08g41760D	BnaSEC224	AT1G11890	SEC221
BnaA08g18180D	BnaSFT16	BnaC03g58880D	BnaSFT13	AT1G29060	SFT11
BnaA09g45980D	BnaSNAP29	BnaC08g40050D	BnaSNAP30	AT1G13890	SNAP30
BnaAnng06850D	BnaSNAP31b	BnaC02g42100D	BnaSNAP31a	AT5G61210	SNAP33
BnaA03g40020D	BnaSNAP34a	BnaC07g31080D	BnaSNAP34b	AT5G61210	SNAP33
BnaA10g23370D	BnaSNAP38	BnaC09g48020D	BnaSNAP39	AT5G07880	SNAP29
BnaA07g36570D	BnaSYN61a	BnaC07g11650D	BnaSYN61b	AT1G27700	SYN61
BnaA08g18800D	BnaSYN61c	BnaCnng57150D	BnaSYN61d	AT1G27700	SYN61
BnaA07g01630D	BnaSYN62a	BnaC07g02930D	BnaSYN62b	AT2G18860	At2g18860
BnaA08g13120D	BnaSYN63e	BnaC03g68000D	BnaSYN63d	AT4G30240	At4g30240
BnaA06g25340D	BnaSYP112a	BnaC06g01410D	BnaSYP112b	AT2G18260	SYP112
BnaA07g01990D	BnaSYP112c	BnaC07g03500D	BnaSYP112d	AT2G18260	SYP112
BnaA03g31960D	BnaSYP121a	BnaC03g73490D	BnaSYP121b	AT3G11820	SYP121
BnaA05g27280D	BnaSYP121c	BnaC05g41390D	BnaSYP121d	AT3G11820	SYP121
BnaA03g41770D	BnaSYP122a	BnaC07g32850D	BnaSYP122d	AT3G52400	SYP122
BnaA04g05470D	BnaSYP122b	BnaC04g28220D	BnaSYP122c	AT3G52400	SYP122
BnaA09g01500D	BnaSYP123a	BnaC09g00640D	BnaSYP123b	AT4G03330	SYP123
BnaA06g06940D	BnaSYP125b	BnaC05g08590D	BnaSYP125a	AT1G11250	SYP124
BnaA08g25390D	BnaSYP125c	.	.	AT1G11250	SYP124
BnaA09g47690D	BnaSYP125e	BnaC08g42150D	BnaSYP125d	AT1G11250	SYP124
BnaA01g33920D	BnaSYP131b	BnaC01g40450D	BnaSYP131c	AT3G03800	SYP131
BnaA05g32710D	BnaSYP131d	BnaC05g48000D	BnaSYP131f	AT3G03800	SYP131
BnaA05g32720D	BnaSYP131e	BnaC05g48010D	BnaSYP131g	AT3G03800	SYP131
BnaA09g18550D	BnaSYP133	.	.	.	.
BnaA03g06240D	BnaSYP21b	BnaC03g08040D	BnaSYP21c	AT5G16830	SYP21
BnaA10g17660D	BnaSYP21e	BnaC09g41030D	BnaSYP21d	AT5G16830	SYP21
BnaA02g24770D	BnaSYP22a	BnaC02g32860D	BnaSYP22b	AT5G46860	SYP22
BnaA06g35880D	BnaSYP22c	BnaC07g19560D	BnaSYP22d	AT5G46860	SYP22
BnaA09g24450D	BnaSYP24b	BnaC05g24420D	BnaSYP24a	AT1G32270	SYP24
BnaA01g08630D	BnaSYP25	.	.	AT4G17730	SYP23
BnaA03g43290D	BnaSYP26	BnaC07g34680D	BnaSYP28	AT4G17730	SYP23
BnaA07g02590D	BnaSYP27	.	.	.	.
BnaA03g01750D	BnaSYP31a	BnaC03g02260D	BnaSYP31b	AT5G05760	SYP31
BnaA01g23010D	BnaSYP32a	BnaCnng54570D	BnaSYP32f	AT3G24350	SYP32
BnaA03g37320D	BnaSYP32b	BnaC03g43700D	BnaSYP32c	AT3G24350	SYP32
BnaA07g05660D	BnaSYP32d	BnaCnng50850D	BnaSYP32e	AT3G24350	SYP32
BnaA09g00660D	BnaSYP43a	BnaCnng23310D	BnaSYP43b	AT4G02195	SYP43
BnaA05g31560D	BnaSYP44	BnaC05g46100D	BnaSYP45	AT3G05710	SYP42
BnaAnng02730D	BnaSYP46	.	.	AT3G05710	SYP42
BnaA06g10830D	BnaSYP51b	BnaC05g12340D	BnaSYP51a	AT1G16240	SYP51
BnaA09g56390D	BnaSYP51d	BnaC08g38470D	BnaSYP51c	AT1G16240	SYP51
BnaA02g19290D	BnaSYP52a	.	.	AT1G79590	SYP52
BnaA07g08320D	BnaSYP61c	BnaC07g10300D	BnaSYP61d	AT1G28490	SYP61
BnaA08g18280D	BnaSYP61e	BnaC03g58730D	BnaSYP61a	AT1G28510	At1g28510
BnaA09g27220D	BnaSYP61f	BnaC05g21920D	BnaSYP61b	AT1G28490	SYP61
BnaA01g32080D	BnaSYP71a	BnaC01g38990D	BnaSYP71b	AT3G09740	SYP71
BnaA05g28800D	BnaSYP71c	BnaC05g43270D	BnaSYP71e	AT3G09740	SYP71
BnaA09g39190D	BnaSYP73b	BnaC08g31380D	BnaSYP73a	AT3G61450	SYP73
BnaA06g02090D	BnaSYP81a	BnaC06g04900D	BnaSYP81b	AT1G51745	At1g51745
BnaA10g24920D	BnaTYN11c	BnaC09g49850D	BnaTYN11b	AT5G05570	TYN11
BnaAnng01390D	BnaTYN11d	BnaC02g02250D	BnaTYN11a	AT5G05570	TYN11
BnaA03g53420D	BnaTYN12a	BnaC07g45690D	BnaTYN12d	AT4G35560	TYN12
BnaA09g35220D	BnaUSE16	BnaC08g26520D	BnaUSE14	AT3G55600	USE12
BnaA10g21300D	BnaVAMP713b	BnaC09g45410D	BnaVAMP713a	AT5G11150	VAMP713
BnaA03g08500D	BnaVAMP714a	BnaC03g10830D	BnaVAMP714b	AT5G22360	VAMP714
BnaA02g05590D	BnaVAMP715	.	.	AT5G22360	VAMP714
BnaA08g28050D	BnaVAMP721b	BnaC08g00950D	BnaVAMP721a	AT1G04760	VAMP724
BnaA09g50530D	BnaVAMP721d	BnaC08g43980D	BnaVAMP721c	AT1G04760	VAMP724
BnaA10g02890D	BnaVAMP721e	BnaC05g02770D	BnaVAMP721f	AT1G04760	VAMP724
BnaA03g15280D	BnaVAMP722/3a	BnaC03g18460D	BnaVAMP722/3b	AT2G33120	VAMP722
BnaA04g19170D	BnaVAMP722/3c	BnaC04g43540D	BnaVAMP722/3e	AT2G33120	VAMP722
BnaA05g10490D	BnaVAMP722/3g	BnaC04g11490D	BnaVAMP722/3d	AT2G33120	VAMP722
BnaA03g14990D	BnaVAMP724/6/8a	BnaC03g18020D	BnaVAMP724/6/8c	AT2G32670	VAMP723
BnaA04g18940D	BnaVAMP724/6/8d	BnaC04g43180D	BnaVAMP724/6/8g	AT2G32670	VAMP723
BnaA04g18960D	BnaVAMP724/6/8e	BnaC04g43220D	BnaVAMP724/6/8h	.	.
BnaAnng16140D	BnaVAMP724/6/8i	BnaC04g12180D	BnaVAMP724/6/8f	AT2G32670	VAMP723
BnaA08g05870D	BnaVAMP725a	.	.	AT4G15780	VAMP725
BnaA01g18380D	BnaVAMP725b	BnaC01g22290D	BnaVAMP725c	AT4G15780	VAMP725
BnaA04g04170D	BnaVAMP727a	BnaC04g26360D	BnaVAMP727b	AT3G54300	VAMP727
BnaA07g16340D	BnaVAMP727d	BnaC06g15130D	BnaVAMP727c	AT3G54300	VAMP727
BnaA09g34230D	BnaVAMP727f	BnaC08g25130D	BnaVAMP727e	AT3G54300	VAMP727
BnaA04g09380D	BnaVTI11a	BnaC04g31610D	BnaVTI11c	AT5G39510	VTI11
BnaA07g14720D	BnaVTI11e	BnaC06g12580D	BnaVTI11d	AT5G39630	VTI14
BnaA02g14320D	BnaVTI12a	BnaC02g19220D	BnaVTI12b	.	.
BnaA09g02560D	BnaVTI13a	BnaC09g02020D	BnaVTI13b	AT3G29100	VTI13
BnaA02g07910D	BnaYKT61a	BnaC02g11000D	BnaYKT61b	AT5G58180	YKT62
BnaA05g25020D	BnaYKT61d	.	.	.	.
BnaA02g07810D	BnaYKT63	BnaC02g10880D	BnaYKT64	.	.
.	.	BnaC01g34310D	BnaSEC223	.	.
.	.	BnaC04g55600D	BnaUSE13	AT3G55600	USE12
.	.	BnaC05g30860D	BnaSYP71d	.	.
.	.	BnaC06g20330D	BnaVTI12d	.	.
.	.	BnaC06g39950D	BnaSYP52b	AT1G79590	SYP52
.	.	BnaC09g19750D	BnaSYP22e	AT5G46860	SYP22
.	.	BnaC09g33590D	BnaYKT61e	AT5G58180	YKT62
BnaA05g15350D	BnaA05g15350D	BnaC06g09020D	BnaSYP83	AT1G51745	At1g51745
BnaA03g02260D	BnaSYP31b	BnaC03g03290D	BnaC03g03290D	AT5G07880	SNAP29
BnaA07g35020D	BnaSYP52c	BnaC06g39960D	BnaC06g39960D	AT1G79590	SYP52

## Sheet: S5
Table S5 Grouped number of SNARE proteins in Triticum aestivum, Oryza sativa, Solanum lycopersicum, Arabidopsis thaliana, and Brassica napus.
SNARE type	SNARE subfamily	Triticum aestivum	Oryza sativa	Solanum lycopersicum	Arabidopsis thaliana	Brassica napus
Qa		48	14	20	19	70
Qa percent		0.277	0.233333	0.31746	0.283582	0.295359
	SYP1	33	7	9	9	34
	SYP2	6	3	5	4	17
	SYP3	3	1	2	2	10
	SYP4	3	1	2	3	5
	SYP8	3	2	2	1	4
Qb		37	11	11	12	44
Qb percent		0.214	0.183333	0.174603	0.179104	0.185654
	MEMB	3	1	3	2	2
	GOS1	5	3	3	2	10
	VTI1	13	3	2	4	14
	NPSN	9	3	2	3	14
	SEC20	7	1	1	1	4
Qc		39	16	11	15	48
Qc percent		0.225	0.281	0.174603	0.223881	0.202532
	BET1	3	2	2	2	6
	SFT1	3	2	1	2	4
	USE1	7	4	2	2	4
	SYP5	7	3	3	2	8
	SYP6	13	3	1	1	6
	SYP7	6	2	2	3	9
	SYN6	-	-	-	3	11
Qbc	SNAP	13	3	3	3	10
Qbc percent		0.075	0.05	0.047619	0.0447761	0.0421941
R		36	16	18	18	65
R percent		0.208	0.266667	0.285714	0.268657	0.274262
	VAMP71	9	3	2	4	8
	VAMP72	15	6	7	8	32
	TKT6	6	2	1	2	8
	SEC22	6	3	4	2	9
	TYN		2	4	2	8
Total		173	60	63	67	237

## Sheet: S6
Table S6 Twenty conserved motifs of BnaSNAREs defined by the MEME suite
Number of motif	Motif sequence	E-value	Description
1	ELSQIFLDMAQLVEVQGEMMDNIEKHVD	7.9e-1101	t-SNARE
2	GAQQLRKAGKTQRSSRKWTCMKIIJLLIVIJIVLJLIIV	1.2e-1252	SNARE
3	IYSFVARGTVILAEFTDFKGNFTSIAAQCLQKLPSSNNK	1.3e-902	Longin
4	GGDRARTAVANGLNKEFGSVLKEFMQYR	2.7e-804	Longin
5	GFTYCVVAVESAGRQIPMAFLERVKEDF	5.3e-636	Longin
6	LLKKLQDSNEESKTVHBAKAVKSLRNKMDADVGDVLKRAKAIKRKJEALD	7.1e-589	Syntaxin_N,Syntaxin,SYNTAXIN-124
7	ERINSEYRETVERRYFTVTGENPDEETI	5.6e-418	Syntaxin_N,Syntaxin
8	LLMESKRQELVLLDNEIAFNEAVIEEREQGIQEIQQQIG	1.6e-353	SYNTAXIN,SYNTAXIN-23
9	VASGIFQINTAVSSFQRLVNTJGTPKDTPELRDKLHKTR	5.5e-368	Syntaxin,Syntaxin-2,SNARE
10	EETTDRIKKSRRVAEETEEIATSTLDMLLEQGEKLLRTHEKLSDVDDALG	1.7e-492	V-SNARE_C,SNARE fusion complex
11	QSMVKELNSYVALKKKYMSTLGSKKVELERVRGGASDESTQSRNVQTGSA	9.3e-341	Motif
12	LWQKDPFFIVAEEVQESADKMESAYRKW	8.1e-288	Syntaxin-6_N
13	TGESERFLQKAIQEQGRGQVLDTLAEIQERHDAVKDIEK	2.8e-288	Syntaxin_N,Syntaxin
14	GGSEMVSHTLTRHQEILQDLTQEFYRHRSSLSAKQEHASLLEDFREFDRT	5.9e-273	Golgi_SNAP_su1,GOS-28 SNARE- RELATED
15	PKRSSRTREPLPESADAYQKVEMEKAKQDDGLSDLSDJL	4.9e-235	SYNAPTOSOMAL ASSOCIATED PROTEIN,SNAP25 HOMOLOGOUS PROTEIN SNAP29
16	LKAKLREIKSQLEEFEREVK	3.5e-213	Synaptobrevin
17	QSZARSYAKQGKQLRRKLWIQNAAMKLMVLGVILLLILI	1.1e-232	Motif
18	SNSFKRNQAQFGDQEAGQETMNLDKFFEDVENVKEDMKE	1e-208	Synaptobrevin
19	TVVDDLKNRLMDTTKEFKDVLTLRTENMKIHENRRQRFSKNPSKESTNPF	4.1e-184	Syntaxin,Syntaxin-52
20	QHEEYKVHAYNRNGLCAVGFMDDHYPVRSAFSLLNQVIDEYQKSFGETWR	4.1e-179	Longin,SNARE-like

## Sheet: S7
Table S7 Tandem duplication events of BnaSNARE genes
Gene1 name	Gene1 ID	chr.NO.	start	end	Gene2 name	Gene2 ID	chr.NO.	start	end	Gene3 name	Gene3 ID	chr.NO.	start	end
BnaSYP131a	BnaA01g33910D	chrA01	22953668	22954456	BnaSYP131b	BnaA01g33920D	chrA01	22954526	22955979
BnaYKT63	BnaA02g07810D	chrA02	3702096	3703284	BnaYKT61a	BnaA02g07910D	chrA02	3747499	3749399
BnaVAMP724/6/8a	BnaA03g14990D	chrA03	6914267	6916847	BnaVAMP722/3a	BnaA03g15280D	chrA03	7092094	7093550
BnaVTI11a	BnaA04g09380D	chrA04	8416636	8418470	BnaVTI11b	BnaA04g09440D	chrA04	8428898	8429286
BnaVAMP724/6/8d	BnaA04g18940D	chrA04	15034458	15035955	BnaVAMP724/6/8e	BnaA04g18960D	chrA04	15040045	15040841	BnaVAMP722/3c	BnaA04g19170D	chrA04	15198241	15200257
BnaSYP131d	BnaA05g32710D	chrA05	22369544	22370309	BnaSYP131e	BnaA05g32720D	chrA05	22370382	22372013
BnaGOS11b	BnaA06g10560D	chrA06	5591031	5592811	BnaSYP51b	BnaA06g10830D	chrA06	5673050	5674355
BnaSYN61a	BnaA07g36570D	chrA07_R	552423	553893	BnaSFT14	BnaA07g36490D	chrA07_R	481100	482509
BnaSFT16	BnaA08g18180D	chrA08	14263104	14264808	BnaSYP61e	BnaA08g18280D	chrA08	14315872	14320149
BnaSEC221c	BnaA08g25060D	chrA08	17344672	17346286	BnaSYP125c	BnaA08g25390D	chrA08	17480606	17481767
BnaSYP51d	BnaA09g56390D	chrA09_R	3719395	3720924	BnaGOS11f	BnaA09g56530D	chrA09_R	3763774	3765482
BnaSYP31d	BnaA10g24800D	chrA10	16132642	16132919	BnaTYN11c	BnaA10g24920D	chrA10	16173271	16180035
BnaVAMP724/6/8b	BnaC03g18010D	chrC03	9234625	9234960	BnaVAMP724/6/8c	BnaC03g18020D	chrC03	9235123	9236129
BnaSEC20b	BnaC03g43610D	chrC03	28710664	28712637	BnaSYP32c	BnaC03g43700D	chrC03	28814029	28816153
BnaSYP61a	BnaC03g58730D	chrC03	48062837	48066354	BnaSFT13	BnaC03g58880D	chrC03	48156290	48157975
BnaVAMP724/6/8g	BnaC04g43180D	chrC04	43546409	43547921	BnaVAMP724/6/8h	BnaC04g43220D	chrC04	43562236	43562926
BnaVAMP722/3e	BnaC04g43540D	chrC04	43894335	43895955	BnaVAMP722/3f	BnaC04g43550D	chrC04	43896117	43896585
BnaGOS11a	BnaC05g12110D	chrC05	7043774	7045511	BnaSYP51a	BnaC05g12340D	chrC05	7135475	7136909
BnaSYP131f	BnaC05g48000D	chrC05	42704093	42704850	BnaSYP131g	BnaC05g48010D	chrC05	42704923	42706528
BnaSYP82	BnaC06g09010D	chrC06	10667052	10669472	BnaSYP83	BnaC06g09020D	chrC06	10669563	10673077
BnaUSE14	BnaC08g26520D	chrC08	27891024	27893071	BnaUSE15	BnaC08g26540D	chrC08	27919183	27920927
BnaSYP51c	BnaC08g38470D	chrC08	34742588	34744179	BnaGOS11e	BnaC08g38620D	chrC08	34792104	34793644
BnaSEC224	BnaC08g41760D	chrC08	36226382	36227859	BnaSYP125d	BnaC08g42150D	chrC08	36465279	36466380

## Sheet: S8
Table S8 The estimated Ka/Ks ratio for each pair of paralog genes from B.napus
Gene1	Gene2	Ka	Ks	Ka/Ks	EffectiveLen	AverageS-sites	AverageN-sites
>BnaSYP25	>BnaSYP26	0.0588858	0.288024	0.204447	828	192.333	635.667
>BnaSYP71a	>BnaSYP71c	0.0197922	0.33662	0.0587969	795	180.667	614.333
>BnaSYP131a	>BnaSYP131d	0.00963095	0.263548	0.0365434	399	85.5	313.5
>BnaSYP131b	>BnaSYP131e	0.03719	0.274142	0.13566	531	117.583	413.417
>BnaSYP25	>BnaSYP22c	0.0895172	1.09246	0.0819406	804	187.75	616.25
>BnaSYP32a	>BnaSYP32d	0.0574981	0.288512	0.199292	1026	240.083	785.917
>BnaSYN63a	>BnaSYN63e	0.116478	0.389353	0.299158	777	174.5	602.5
>BnaVAMP725b	>BnaVAMP725a	0.17768	0.537865	0.330343	606	133.5	472.5
>BnaVAMP711b	>BnaVAMP711c	0.00600003	0.101506	0.0591101	660	158	502
>BnaSYN63a	>BnaSYN63b	0.0442024	0.134161	0.329474	837	188.583	648.417
>BnaVAMP725b	>BnaVAMP725c	0.00386786	0.093703	0.0412778	666	147.583	518.417
>BnaSYP131a	>BnaSYP131c	0	0.100993	0	399	84.6667	314.333
>BnaSYP71a	>BnaSYP71b	0.0114882	0.0940565	0.122141	795	181	614
>BnaSYN63a	>BnaSYN63d	0.131158	0.422909	0.310132	783	176.333	606.667
>BnaSYP71a	>BnaSYP71e	0.023136	0.391009	0.0591699	795	180.5	614.5
>BnaSYP131a	>BnaSYP131f	0.0210483	0.254104	0.0828336	399	85.8333	313.167
>BnaSYP131b	>BnaSYP131g	0.0391174	0.249758	0.156621	522	115.333	406.667
>BnaSYP25	>BnaSYP28	0.0504187	0.295854	0.170417	828	192.25	635.75
>BnaNPSN13c	>BnaNPSN13d	0.00790105	0.0836688	0.0944325	813	176.833	636.167
>BnaVAMP715	>BnaVAMP714a	0.0269266	0.20613	0.13063	663	152.583	510.417
>BnaSYP22a	>BnaSYP22c	0.0265661	0.415733	0.0639019	801	188	613
>BnaSYP52a	>BnaSYP52c	0.0168942	0.312926	0.0539878	699	160.25	538.75
>BnaYKT61a	>BnaYKT61f	0.00872578	0.338201	0.0258006	597	135.917	461.083
>BnaYKT63	>BnaYKT61f	0.167132	0.763643	0.218862	597	135.333	461.667
>BnaVTI12a	>BnaVTI12b	0.00388099	0.0925343	0.0419411	666	149.333	516.667
>BnaYKT63	>BnaYKT64	0.0152927	0.045962	0.332725	597	134.583	462.417
>BnaYKT61a	>BnaYKT61b	0.0021692	0.173851	0.0124773	597	135.333	461.667
>BnaSYP22a	>BnaSYP22b	0.00821026	0.0840431	0.0976911	801	188.667	612.333
>BnaVAMP715	>BnaVAMP714b	0.0259205	0.201576	0.128589	663	152.75	510.25
>BnaSYP52a	>BnaSYP52b	0.0169021	0.266506	0.0634213	699	160.5	538.5
>BnaSYP22a	>BnaSYP22d	0.028266	0.379144	0.0745522	801	188.167	612.833
>BnaSYP22a	>BnaSYP22e	0.436041	0.832211	0.523954	594	137.083	456.917
>BnaYKT61a	>BnaYKT61e	0.00872896	0.29293	0.0297988	597	136.083	460.917
>BnaSNAP32	>BnaSNAP34a	0.162126	1.06356	0.152436	870	194.417	675.583
>BnaVAMP724/6/8a	>BnaVAMP724/6/8d	0.0276575	0.233719	0.118337	660	144.417	515.583
>BnaVAMP722/3a	>BnaVAMP722/3c	0.0639982	0.354072	0.180749	657	143.5	513.5
>BnaSYP122a	>BnaSYP122b	0.0607278	0.482068	0.125973	1002	230.583	771.417
>BnaSYP121a	>BnaSYP121c	0.0588359	0.584109	0.100728	999	236.167	762.833
>BnaVAMP722/3a	>BnaVAMP722/3g	0.0154869	0.263366	0.0588038	666	144.083	521.917
>BnaNPSN11a	>BnaNPSN11d	0.0179527	0.308822	0.0581328	786	165.917	620.083
>BnaNPSN12a	>BnaNPSN13a	0.0376732	0.536994	0.0701558	813	173.417	639.583
>BnaSEC20a	>BnaSEC20c	0.0468964	0.29474	0.159111	855	202.417	652.583
>BnaSNAP34a	>BnaSNAP38	0.159469	1.11238	0.143358	858	187.417	670.583
>BnaSYP21b	>BnaSYP21e	0.0395572	0.284517	0.139033	828	192.167	635.833
>BnaSNAP32	>BnaSNAP38	0.0917693	0.519067	0.176797	834	183.75	650.25
>BnaSYP31a	>BnaSYP31d	0.046005	0.443151	0.103813	189	43.3333	145.667
>BnaSNAP34a	>BnaSNAP31b	0.0499921	0.486931	0.102668	837	185.667	651.333
>BnaSYP21b	>BnaSYP21a	0.0690007	0.249016	0.277094	582	134.5	447.5
>BnaSNAP34a	>BnaSNAP31a	0.0501446	0.440569	0.113818	834	184.583	649.417
>BnaSNAP32	>BnaC03g03290D	0.184327	0.455897	0.404316	294	67.0833	226.917
>BnaSYP21b	>BnaSYP21c	0.00632748	0.0936136	0.0675915	828	193.167	634.833
>BnaVAMP714a	>BnaVAMP714b	0.00988157	0.142949	0.0691265	663	153.667	509.333
>BnaSEC222a	>BnaSEC222b	0.138839	0.21388	0.649146	627	143.75	483.25
>BnaVAMP724/6/8a	>BnaVAMP724/6/8b	0.170809	0.355079	0.481045	258	58.3333	199.667
>BnaVAMP722/3a	>BnaVAMP722/3b	0.00577481	0.196687	0.0293605	666	144.5	521.5
>BnaGOS12a	>BnaGOS12b	0.00188088	0.0424356	0.0443232	702	169.667	532.333
>BnaNPSN12a	>BnaNPSN12b	0.00706257	0.0633542	0.111477	813	172.833	640.167
>BnaSEC20a	>BnaSEC20b	0.0252617	0.0943806	0.267658	744	180.417	563.583
>BnaSYP32b	>BnaSYP32c	0.0065027	0.109409	0.0594349	1008	235.75	772.25
>BnaSYP31a	>BnaSYP31b	0.0196118	0.13305	0.147401	1020	236.5	783.5
>BnaSYP121a	>BnaSYP121b	0.00395128	0.143236	0.0275858	999	237.75	761.25
>BnaGOS12a	>BnaGOS12c	0.0132433	0.357631	0.0370306	702	168.75	533.25
>BnaVAMP724/6/8a	>BnaVAMP724/6/8g	0.0276393	0.224927	0.122881	660	144.083	515.917
>BnaVAMP722/3a	>BnaVAMP722/3e	0.107987	0.431202	0.250432	501	108.25	392.75
>BnaVAMP724/6/8a	>BnaVAMP724/6/8f	0.0196797	0.321962	0.0611243	660	145.167	514.833
>BnaVAMP722/3a	>BnaVAMP722/3d	0.0174567	0.39095	0.0446521	666	144.417	521.583
>BnaNPSN11a	>BnaNPSN11c	0.0229652	0.245796	0.0934318	786	167	619
>BnaSYP122a	>BnaSYP122c	0.125899	0.389756	0.323019	300	75.6667	224.333
>BnaSYP121a	>BnaSYP121d	0.0576618	0.582262	0.0990306	999	236.25	762.75
>BnaSNAP34a	>BnaSNAP34b	0.00569263	0.112712	0.0505061	906	200.667	705.333
>BnaSYP122a	>BnaSYP122d	0.00908905	0.150625	0.0603421	1002	227.167	774.833
>BnaSYP26	>BnaSYP28	0.0182139	0.103179	0.176528	831	191.917	639.083
>BnaTYN12a	>BnaTYN12d	0.0165688	0.125469	0.132055	3081	701.083	2379.92
>BnaSNAP34a	>BnaSNAP39	0.145504	1.17828	0.123488	876	193	683
>BnaSYP21b	>BnaSYP21d	0.0346463	0.306044	0.113207	828	193	635
>BnaSNAP32	>BnaSNAP39	0.0894503	0.497549	0.179782	840	186.75	653.25
>BnaVAMP722/3c	>BnaVAMP722/3g	0.0725177	0.300404	0.241401	657	143.417	513.583
>BnaA04g21140D	>BnaMEMB14	0.108941	0.676426	0.161054	189	46	143
>BnaA04g09370D	>BnaVTI11e	0.0279443	0.298947	0.0934758	4218	955.167	3262.83
>BnaVAMP727a	>BnaVAMP727d	0.0263001	0.367794	0.0715078	720	152.5	567.5
>BnaVAMP727a	>BnaVAMP727f	0.0271159	0.379621	0.0714289	720	150.5	569.5
>BnaVTI11a	>BnaVTI13a	0.105991	1.15164	0.0920342	663	152.083	510.917
>BnaVAMP724/6/8d	>BnaVAMP724/6/8b	0.180787	0.495162	0.365106	258	57.25	200.75
>BnaVAMP727a	>BnaVAMP727b	0.0900257	0.377341	0.238579	597	124.5	472.5
>BnaSYP122b	>BnaSYP122c	0.0178447	0.108541	0.164405	306	79.1667	226.833
>BnaVTI11a	>BnaVTI11c	0.00391902	0.0987339	0.0396927	663	151.333	511.667
>BnaVAMP724/6/8d	>BnaVAMP724/6/8g	0.0117152	0.128616	0.0910863	660	143.833	516.167
>BnaVAMP722/3c	>BnaVAMP722/3e	0.0313089	0.0767442	0.407964	501	109.667	391.333
>BnaA04g21140D	>BnaMEMB13	0.109078	0.922176	0.118283	189	46.1667	142.833
>BnaVAMP724/6/8d	>BnaVAMP724/6/8f	0.036805	0.338742	0.108652	660	144.917	515.083
>BnaVAMP722/3c	>BnaVAMP722/3d	0.0747166	0.320583	0.233065	657	143.75	513.25
>BnaVAMP727a	>BnaVAMP727c	0.0299725	0.42241	0.0709559	720	152.75	567.25
>BnaVTI11a	>BnaVTI11d	0.0505327	0.44714	0.113013	663	151.417	511.583
>BnaSYP122b	>BnaSYP122d	0.0606868	0.609489	0.09957	1002	230.083	771.917
>BnaVAMP727a	>BnaVAMP727e	0.0271361	0.346042	0.0784184	720	150.917	569.083
>BnaA05g15350D	>BnaSYP81a	0.145505	0.535048	0.271948	1554	357.5	1196.5
>BnaVAMP722/3g	>BnaVAMP721e	0.0255804	0.553358	0.0462277	660	143.083	516.917
>BnaSYP44	>BnaSYP46	0.038247	0.371116	0.103059	951	213.5	737.5
>BnaSYP71c	>BnaSYP71b	0.0198086	0.326865	0.0606017	795	181.167	613.833
>BnaSYP131d	>BnaSYP131c	0.0126786	0.242629	0.0522551	405	86.8333	318.167
>BnaVAMP722/3g	>BnaVAMP722/3b	0.0154969	0.252874	0.0612832	666	144.417	521.583
>BnaNPSN13a	>BnaNPSN12b	0.0401972	0.504594	0.0796625	813	174.25	638.75
>BnaSYP121c	>BnaSYP121b	0.0567571	0.550484	0.103104	999	236.75	762.25
>BnaMEMB14	>BnaMEMB13	0.00771959	0.131826	0.0585588	678	157.167	520.833
>BnaNPSN11d	>BnaNPSN11c	0.0129331	0.136667	0.0946323	792	168.083	623.917
>BnaVAMP722/3g	>BnaVAMP722/3d	0.0019084	0.0881208	0.0216566	669	144.333	524.667
>BnaVAMP722/3g	>BnaVAMP722/3f	0.343733	0.822156	0.418087	321	69.25	251.75
>BnaSYP121c	>BnaSYP121d	0.00391433	0.197064	0.0198633	1005	236.583	768.417
>BnaSYP71c	>BnaSYP71e	0.00818339	0.126298	0.0647945	795	180.667	614.333
>BnaSYP44	>BnaSYP45	0.00680045	0.156477	0.0434598	951	212.417	738.583
>BnaSYP131d	>BnaSYP131f	0.017554	0.0289611	0.606123	405	88	317
>BnaSYP131e	>BnaSYP131g	0.00492916	0.00875283	0.56315	522	114.917	407.083
>BnaA05g15350D	>BnaSYP83	0.0430029	0.154861	0.277688	1575	368.667	1206.33
>BnaA05g15350D	>BnaSYP81b	0.134277	0.551516	0.24347	1560	359.583	1200.42
>BnaGOS11b	>BnaGOS11c	0.0354496	0.302685	0.117117	660	154.583	505.417
>BnaKNOLLEb	>BnaKNOLLEc	0.055493	0.708121	0.0783665	909	198.583	710.417
>BnaSYP125b	>BnaSYP125c	0.0156943	0.491792	0.0319125	894	185.75	708.25
>BnaSEC221b	>BnaSEC225	0.00599204	0.325888	0.0183868	654	151.333	502.667
>BnaGOS11b	>BnaGOS11f	0.0137416	0.236223	0.0581722	672	157.917	514.083
>BnaSYP51b	>BnaSYP51d	0.026179	0.377106	0.0694209	696	151.833	544.167
>BnaSYP22c	>BnaSYP22b	0.021495	0.337847	0.0636235	801	187.5	613.5
>BnaSEC221b	>BnaSEC221a	0.00399203	0.113692	0.0351125	654	151.667	502.333
>BnaGOS11b	>BnaGOS11a	0.00388665	0.168439	0.0230745	675	159.083	515.917
>BnaSYP51b	>BnaSYP51a	0.00552573	0.153727	0.035945	696	151.083	544.917
>BnaKNOLLEb	>BnaKNOLLEa	0.0172421	0.188662	0.0913915	921	202.333	718.667
>BnaSYP125b	>BnaSYP125a	0.00282952	0.135263	0.0209187	894	185.833	708.167
>BnaSYP81a	>BnaSYP81b	0.0200908	0.0786218	0.255537	2703	609.583	2093.42
>BnaSYP51b	>BnaSYP52b	0.0786264	0.713642	0.110176	696	155.667	540.333
>BnaSYP81a	>BnaSYP83	0.149407	0.464929	0.321355	1965	449.25	1515.75
>BnaSYP112a	>BnaSYP112b	0.0189332	0.141973	0.133358	858	189.417	668.583
>BnaSYP112a	>BnaSYP112d	0.0890956	0.430295	0.207057	606	131.833	474.167
>BnaSYP22c	>BnaSYP22d	0.00161464	0.0952772	0.0169468	810	190	620
>BnaGOS11b	>BnaGOS11d	0.0323609	0.326635	0.0990736	660	154.833	505.167
>BnaSEC221b	>BnaSEC224	0.00600003	0.376569	0.0159334	654	152	502
>BnaKNOLLEb	>BnaKNOLLEd	0.0495747	0.572692	0.0865643	906	197.25	708.75
>BnaGOS11b	>BnaGOS11e	0.0157074	0.237253	0.0662052	672	157.333	514.667
>BnaSYP51b	>BnaSYP51c	0.0233228	0.37221	0.0626603	696	151.667	544.333
>BnaSYP125b	>BnaSYP125d	0.0229326	0.317178	0.0723021	894	185.583	708.417
>BnaSEC221b	>BnaSEC221d	0.00799874	0.435898	0.01835	654	151.25	502.75
>BnaSYP22c	>BnaSYP22e	0.434364	0.980694	0.442915	600	138.75	461.25
>BnaA07g08310D	>BnaSYP61e	0.0740712	0.878017	0.0843619	531	119.833	411.167
>BnaSYP61c	>BnaSYP61f	0.0131371	0.391283	0.0335744	735	159.083	575.917
>BnaBET14	>BnaBET11d	0.0502863	0.291714	0.172383	372	87.5833	284.417
>BnaVAMP727d	>BnaVAMP727f	0.0187009	0.351348	0.053226	720	151.5	568.5
>BnaA07g08310D	>BnaSYP61a	0.0696676	0.761591	0.0914764	525	119.167	405.833
>BnaSYP32d	>BnaSYP32c	0.0391942	0.309622	0.126587	1011	238.5	772.5
>BnaSEC20c	>BnaSEC20b	0.0525513	0.27569	0.190617	744	179.167	564.833
>BnaVTI11e	>BnaC04g31600D	0.0303423	0.292446	0.103754	4206	955.25	3250.75
>BnaVAMP727d	>BnaVAMP727b	0.114088	0.592672	0.192497	594	125.5	468.5
>BnaSYP61c	>BnaSYP61b	0.01874	0.339589	0.0551843	735	158.667	576.333
>BnaSYP52c	>BnaSYP52b	0	0.144031	0	699	160.25	538.75
>BnaBET14	>BnaBET13	0.0332669	0.276759	0.120202	363	86.4167	276.583
>BnaVAMP727d	>BnaVAMP727c	0.00354244	0.134716	0.0262957	720	154.083	565.917
>BnaVTI11e	>BnaVTI11d	0.011819	0.121695	0.0971201	663	151.333	511.667
>BnaSYP61c	>BnaSYP61d	0.00698288	0.0862829	0.0809301	735	159.5	575.5
>BnaVTI12f	>BnaVTI12e	0	0.0853495	0	666	148.75	517.25
>BnaSYN62a	>BnaSYN62b	0.00311932	0.0116169	0.268516	816	173.5	642.5
>BnaSYP112c	>BnaSYP112d	0.0170432	0.115058	0.148127	606	131.25	474.75
>BnaBET14	>BnaBET11c	0.0506574	0.296949	0.170593	366	87	279
>BnaVAMP727d	>BnaVAMP727e	0.0204487	0.401043	0.0509889	723	152.917	570.083
>BnaSYN61a	>BnaSYN61c	0.0956288	0.652423	0.146575	825	179	646
>BnaSYN61a	>BnaSYN61b	0.0181598	0.128594	0.141218	855	186.167	668.833
>BnaSYP61e	>BnaSYP61f	0.0292115	0.391283	0.0746558	735	159.083	575.917
>BnaSEC221c	>BnaSEC225	0.0059791	0.464161	0.0128815	654	150.25	503.75
>BnaSYP125c	>BnaSYP125e	0.00853393	0.447557	0.0190678	894	186.917	707.083
>BnaVAMP721b	>BnaVAMP721d	0.0217657	0.324522	0.0670702	657	144.25	512.75
>BnaGOS11c	>BnaGOS11f	0.0363953	0.340855	0.106777	660	153.333	506.667
>BnaVAMP721b	>BnaVAMP721e	0.0177436	0.325935	0.0544389	657	143.75	513.25
>BnaSYN63e	>BnaSYN63b	0.134698	0.489005	0.275453	795	177.917	617.083
>BnaVAMP725a	>BnaVAMP725c	0.175824	0.433749	0.405359	606	133.333	472.667
>BnaSYN63e	>BnaSYN63d	0.0219681	0.0680997	0.322587	831	184.333	646.667
>BnaSFT16	>BnaSFT13	0.0063009	0.156094	0.040366	411	92.25	318.75
>BnaSYP61e	>BnaSYP61a	0.0501565	0.151096	0.331952	1281	281.333	999.667
>BnaVAMP721b	>BnaVAMP721f	0.0177406	0.347992	0.05098	657	143.667	513.333
>BnaSEC221c	>BnaSEC221a	0.00398341	0.426696	0.00933547	654	150.583	503.417
>BnaSYP61e	>BnaSYP61b	0.0309961	0.38207	0.081127	735	158.667	576.333
>BnaSYP125c	>BnaSYP125a	0.011403	0.409179	0.027868	894	187.083	706.917
>BnaKNOLLEc	>BnaKNOLLEa	0.0547489	0.888961	0.0615875	909	198.75	710.25
>BnaSFT16	>BnaSFT15	0.0222533	0.410403	0.054223	411	91.75	319.25
>BnaSYP61e	>BnaC07g10290D	0.0926826	0.786703	0.117811	534	121.083	412.917
>BnaSYN61c	>BnaSYN61b	0.100176	0.605319	0.165493	840	184.167	655.833
>BnaVAMP721b	>BnaVAMP721a	0.00587279	0.112009	0.0524314	657	144.167	512.833
>BnaNPSN12d	>BnaNPSN12e	0.241659	0.428143	0.564435	393	82	311
>BnaGOS11c	>BnaGOS11e	0.0384246	0.385031	0.099796	660	152.75	507.25
>BnaSEC221c	>BnaSEC224	0.00598706	0.425428	0.014073	654	150.917	503.083
>BnaSYP125c	>BnaSYP125d	0.00853292	0.41921	0.0203548	894	186.833	707.167
>BnaVAMP721b	>BnaVAMP721c	0.0197999	0.270648	0.0731573	657	145.25	511.75
>BnaBET11a	>BnaBET11b	0	0.0568454	0	396	91.3333	304.667
>BnaGOS11c	>BnaGOS11d	0.0322685	0.183729	0.175631	660	153.417	506.583
>BnaSEC221c	>BnaSEC221d	0.00198741	0.11492	0.0172939	654	150.167	503.833
>BnaKNOLLEc	>BnaKNOLLEd	0.0228154	0.209443	0.108934	909	197	712
>BnaVAMP721d	>BnaVAMP721e	0.0156664	0.215762	0.0726096	660	144	516
>BnaSYP61f	>BnaSYP61a	0.0416412	0.301473	0.138126	714	154.417	559.583
>BnaVAMP727f	>BnaVAMP727b	0.106222	0.520535	0.204064	594	123.667	470.333
>BnaVTI13a	>BnaVTI11c	0.101283	1.34672	0.0752072	663	151.083	511.917
>BnaSEC225	>BnaSEC221a	0.00599204	0.367857	0.0162891	654	151.333	502.667
>BnaSYP61f	>BnaSYP61b	0.0069697	0.0798537	0.0872809	735	158.417	576.583
>BnaSYP24b	>BnaSYP24a	0.018243	0.0703641	0.259266	789	178.667	610.333
>BnaSYP125e	>BnaSYP125a	0.0200681	0.222476	0.0902034	894	187	707
>BnaVAMP727f	>BnaVAMP727c	0.024156	0.450435	0.053628	720	152.083	567.917
>BnaBET11d	>BnaBET13	0.0256906	0.387989	0.0662147	363	85.8333	277.167
>BnaSYP61f	>BnaSYP61d	0.0149106	0.320164	0.0465717	735	159.25	575.75
>BnaSYP73b	>BnaSYP73a	0.0430582	0.113991	0.377732	801	179.667	621.333
>BnaVAMP727f	>BnaVAMP727e	0.00882753	0.179625	0.0491443	720	150.25	569.75
>BnaUSE16	>BnaUSE14	0.00726838	0.143291	0.0507245	714	161	553
>BnaBET11d	>BnaBET11c	0.00720943	0.166105	0.0434028	366	87.25	278.75
>BnaSNAP29	>BnaSNAP30	0	0.0869189	0	798	170.583	627.417
>BnaSEC225	>BnaSEC224	0	0.256984	0	654	151.667	502.333
>BnaSYP125e	>BnaSYP125d	0.00425382	0.103167	0.0412325	894	186.75	707.25
>BnaVAMP721d	>BnaVAMP721c	0.00585369	0.0873714	0.0669978	660	145.5	514.5
>BnaSEC225	>BnaSEC221d	0.00598706	0.461327	0.0129779	654	150.917	503.083
>BnaVAMP721d	>BnaVAMP721a	0.0197672	0.272531	0.0725321	657	144.417	512.583
>BnaVTI13a	>BnaVTI13b	0.00392414	0.0908084	0.0432134	663	152	511
>BnaSYP123a	>BnaSYP123b	0.00563912	0.111315	0.0506592	915	203	712
>BnaSYP43a	>BnaSYP43b	0.0148086	0.131317	0.11277	966	215.833	750.167
>BnaSYP51d	>BnaSYP51a	0.02808	0.334999	0.0838213	696	151.75	544.25
>BnaGOS11f	>BnaGOS11a	0.0187018	0.276851	0.0675516	672	157.667	514.333
>BnaSYP51d	>BnaSYP51c	0.0157998	0.164491	0.0960528	696	152.333	543.667
>BnaGOS11f	>BnaGOS11e	0.00388791	0.148107	0.0262507	672	156.25	515.75
>BnaGOS11f	>BnaGOS11d	0.0291934	0.345294	0.0845466	660	153.583	506.417
>BnaTYN11c	>BnaTYN11d	0.0594391	0.242257	0.245356	3246	764	2482
>BnaTYN11c	>BnaTYN11a	0.0753922	0.245597	0.306975	3237	761.167	2475.83
>BnaSYP21e	>BnaSYP21a	0.0737148	0.305976	0.240917	582	133.333	448.667
>BnaSYP21e	>BnaSYP21c	0.0362487	0.315569	0.114867	828	192.167	635.833
>BnaSNAP38	>BnaC03g03290D	0.227415	0.814768	0.279116	294	67.5833	226.417
>BnaSYP31d	>BnaSYP31b	0.046005	0.402601	0.114269	189	43.3333	145.667
>BnaVAMP721e	>BnaVAMP721f	0.0019383	0.0809112	0.0239559	660	143.417	516.583
>BnaSNAP38	>BnaSNAP34b	0.18748	1.0695	0.175297	864	189.833	674.167
>BnaVAMP721e	>BnaVAMP721c	0.0137169	0.214039	0.0640859	660	145	515
>BnaVAMP721e	>BnaVAMP721a	0.0117861	0.304316	0.0387299	657	143.917	513.083
>BnaSYP21e	>BnaSYP21d	0.0142861	0.162167	0.0880951	828	192	636
>BnaVAMP713b	>BnaVAMP713a	0.00591233	0.167053	0.0353921	663	153.583	509.417
>BnaSNAP38	>BnaSNAP39	0.107153	0.242901	0.441139	1002	222.5	779.5
>BnaTYN11c	>BnaTYN11b	0.00728137	0.0584336	0.124609	3249	764.917	2484.08
>BnaYKT61f	>BnaYKT61b	0.00653243	0.293811	0.0222335	597	135.75	461.25
>BnaYKT61f	>BnaYKT64	0.16588	0.751095	0.220851	597	135.583	461.417
>BnaYKT61f	>BnaYKT61e	0	0.127458	0	597	136.5	460.5
>BnaSNAP31b	>BnaSNAP31a	0.0171726	0.135064	0.127144	834	186.083	647.917
>BnaTYN11d	>BnaTYN11a	0.0397646	0.119503	0.332749	3258	764.167	2493.83
>BnaSYP46	>BnaSYP45	0.0360638	0.384885	0.0937001	951	212.583	738.417
>BnaSNAP31b	>BnaSNAP34b	0.0499921	0.437079	0.114378	837	185.667	651.333
>BnaTYN11d	>BnaTYN11b	0.0601558	0.234016	0.257058	3246	763.583	2482.42
>BnaSYN63b	>BnaSYN63d	0.138731	0.519627	0.266982	795	178.5	616.5
>BnaSYP71b	>BnaSYP71e	0.0214772	0.380362	0.0564653	795	181	614
>BnaSYP131c	>BnaSYP131f	0.0239765	0.23366	0.102613	405	87.1667	317.833
>BnaSYP21a	>BnaSYP21c	0.0616866	0.280767	0.219708	582	134.5	447.5
>BnaSYP22b	>BnaSYP22d	0.0231807	0.304765	0.0760607	801	187.667	613.333
>BnaSNAP31a	>BnaSNAP34b	0.0501446	0.402556	0.124566	834	184.583	649.417
>BnaTYN11a	>BnaTYN11b	0.0782122	0.227139	0.344336	3237	760.75	2476.25
>BnaSYP22b	>BnaSYP22e	0.432572	0.689733	0.627159	594	136.917	457.083
>BnaSYP21a	>BnaSYP21d	0.0719991	0.347022	0.207477	582	134.083	447.917
>BnaYKT61b	>BnaYKT61e	0.0065348	0.271921	0.024032	597	135.917	461.083
>BnaGOS12b	>BnaGOS12c	0.0151688	0.346837	0.0437346	702	169.25	532.75
>BnaVAMP724/6/8c	>BnaVAMP724/6/8g	0.108046	0.276363	0.390957	528	113.917	414.083
>BnaVAMP722/3b	>BnaVAMP722/3e	0.110984	0.309595	0.35848	501	108.417	392.583
>BnaVAMP722/3b	>BnaVAMP722/3d	0.017468	0.366889	0.0476113	666	144.75	521.25
>BnaVAMP724/6/8b	>BnaVAMP724/6/8f	0.180957	0.493129	0.366956	258	57.4167	200.583
>BnaSYP61a	>BnaC07g10290D	0.0930715	0.794202	0.117189	525	119.417	405.583
>BnaSFT13	>BnaSFT15	0.0286964	0.432132	0.0664066	411	91.3333	319.667
>BnaC03g03290D	>BnaSNAP39	0.204535	0.696944	0.293474	294	66.8333	227.167
>BnaSYP21c	>BnaSYP21d	0.031355	0.354318	0.088494	828	193	635
>BnaSYP121b	>BnaSYP121d	0.0539385	0.541456	0.0996175	999	236.833	762.167
>BnaC03g77960D	>BnaSYP82	0.3168	0.850914	0.372305	591	136.917	454.083
>BnaVAMP724/6/8f	>BnaVAMP724/6/8g	0.0357624	0.367434	0.0973302	660	144.583	515.417
>BnaVTI11c	>BnaVTI11d	0.0504307	0.475884	0.105973	663	150.417	512.583
>BnaSYP122c	>BnaSYP122d	0.119584	0.499003	0.239647	303	76.8333	226.167
>BnaVAMP727b	>BnaVAMP727e	0.108985	0.500796	0.217623	594	124.083	469.917
>BnaSYP51a	>BnaSYP52b	0.0868786	0.650441	0.133569	696	155.583	540.417
>BnaSYP61b	>BnaSYP61d	0.0205271	0.291225	0.0704856	735	158.833	576.167
>BnaVAMP721f	>BnaVAMP721a	0.0117842	0.325699	0.0361813	657	143.833	513.167
>BnaVAMP721f	>BnaVAMP721c	0.0156945	0.22342	0.0702469	660	144.917	515.083
>BnaGOS11a	>BnaGOS11d	0.0375268	0.373744	0.100408	660	154.583	505.417
>BnaSEC221a	>BnaSEC224	0.00600003	0.355139	0.0168949	654	152	502
>BnaKNOLLEa	>BnaKNOLLEd	0.0488333	0.634208	0.0769988	906	197.417	708.583
>BnaGOS11a	>BnaGOS11e	0.020674	0.315929	0.0654387	672	157.083	514.917
>BnaSYP51a	>BnaSYP51c	0.0290253	0.372475	0.0779255	696	151.583	544.417
>BnaSYP125a	>BnaSYP125d	0.0186145	0.244504	0.0761316	894	186.917	707.083
>BnaSEC221a	>BnaSEC221d	0.00398871	0.424167	0.00940362	654	151.25	502.75
>BnaSYP81b	>BnaSYP83	0.145981	0.483376	0.302003	1950	448.583	1501.42
>BnaSYP112b	>BnaSYP112d	0.0712702	0.412661	0.172709	603	132.333	470.667
>BnaVAMP727c	>BnaVAMP727e	0.024174	0.472995	0.0511083	720	152.5	567.5
>BnaBET13	>BnaBET11c	0.0370904	0.345611	0.107318	363	86.6667	276.333
>BnaSYP52b	>BnaSYP51c	0.0759156	0.580829	0.130702	696	155.833	540.167
>BnaSYP22d	>BnaSYP22e	0.437162	0.96079	0.455003	600	138.917	461.083
>BnaSNAP34b	>BnaSNAP39	0.166777	1.17653	0.141753	885	195.083	689.917
>BnaVAMP721a	>BnaVAMP721c	0.0178021	0.241262	0.0737873	657	145.417	511.583
>BnaGOS11d	>BnaGOS11e	0.0312126	0.400754	0.0778846	660	153	507
>BnaSEC221d	>BnaSEC224	0.00599504	0.411409	0.014572	654	151.583	502.417

## Sheet: S9
Table S9 RNA-Seq data of BnaSNAREs in root and leaf. Read abundance is showed in terms of Reads Per Kilobase Million. PA, IA, KA represents Brassica napus roots replicate 1, 2 and 3 transcriptome; LA, MA, NA represents Brassica napus leaves replicate 1, 2 and 3 transcriptome.
ID	Name	PA	IA	KA	LA	MA	NA
BnaC05g06210D	BnaKNOLLEa	10.214	8.513	12.594	11.942	14.164	8.209
BnaA06g04950D	BnaKNOLLEb	15.144	14.208	17.587	16.714	20.381	9.771
BnaA08g26870D	BnaKNOLLEc	3.995	3.427	5.558	4.845	5.071	2.65
BnaC08g13620D	BnaKNOLLEd	4.05	3.361	5.122	3.746	4	2.237
BnaA06g25340D	BnaSYP112a	0	0.009	0.018	0	0.011	0.011
BnaC06g01410D	BnaSYP112b	0	0	0	0	0	0
BnaA07g01990D	BnaSYP112c	0.06	0.018	0.045	0.205	0.227	0.236
BnaC07g03500D	BnaSYP112d	0	0	0	0	0	0
BnaAnng35230D	BnaSYP112e	0	0	0	0	0	0
BnaAnng38190D	BnaSYP112f	0	0.037	0	0	0	0
BnaA03g31960D	BnaSYP121a	24.664	19.191	63.599	5.239	4.339	8.738
BnaC03g73490D	BnaSYP121b	35.439	29.053	91.4	8.655	8.094	12.038
BnaA05g27280D	BnaSYP121c	15.007	14.312	36.097	1.813	1.28	2.535
BnaC05g41390D	BnaSYP121d	12.409	11.908	28.425	1.614	0.882	1.566
BnaA03g41770D	BnaSYP122a	0.448	0.555	1.243	0.069	0.029	0.018
BnaA04g05470D	BnaSYP122b	38.54	31.453	151.607	0.565	0.601	2.213
BnaC04g28220D	BnaSYP122c	15.165	14.518	76.807	0.318	0.276	0.787
BnaC07g32850D	BnaSYP122d	0.468	0.311	0.386	0.009	0.019	0.072
BnaA09g01500D	BnaSYP123a	0.482	0.711	0.156	0	0	0
BnaC09g00640D	BnaSYP123b	0.424	0.411	0.277	0	0	0
BnaC05g08590D	BnaSYP125a	0	0	0	0.01	0.011	0.02
BnaA06g06940D	BnaSYP125b	0.077	0.018	0.018	0.233	0.182	0.143
BnaA08g25390D	BnaSYP125c	0	0	0	0	0	0
BnaC08g42150D	BnaSYP125d	0	0	0	0	0	0
BnaA09g47690D	BnaSYP125e	0	0	0	0	0	0
BnaAnng32640D	BnaSYP125f	0	0	0	0	0	0
BnaA01g33910D	BnaSYP131a	0	0	0	0	0	0
BnaA01g33920D	BnaSYP131b	0	0	0.011	0	0	0
BnaC01g40450D	BnaSYP131c	0.007	0.007	0.007	0.007	0	0
BnaA05g32710D	BnaSYP131d	0	0.03	0.076	0	0.018	0
BnaA05g32720D	BnaSYP131e	0.035	0.036	0.025	0	0	0
BnaC05g48000D	BnaSYP131f	0.015	0	0	0	0	0
BnaC05g48010D	BnaSYP131g	0	0	0	0	0	0
BnaA09g18550D	BnaSYP133	3.674	4.008	3.994	2.358	2.419	3.369
BnaC02g06890D	BnaSYP21a	4.052	4.203	3.471	2.033	2.3	2.522
BnaA03g06240D	BnaSYP21b	19.98	19.479	57.836	3.388	3.581	5.608
BnaC03g08040D	BnaSYP21c	27.994	22.837	123.674	2.305	2.772	4.463
BnaC09g41030D	BnaSYP21d	20.488	21.938	20.77	15.592	13.897	20.677
BnaA10g17660D	BnaSYP21e	21.976	24.721	25.037	10.573	9.72	13.354
BnaA02g24770D	BnaSYP22a	17.272	17.411	15.896	8.32	8.236	10.175
BnaC02g32860D	BnaSYP22b	11.476	12.451	11.391	6.566	6.625	7.237
BnaA06g35880D	BnaSYP22c	16.204	17.228	15.217	5.562	6.168	5.167
BnaC07g19560D	BnaSYP22d	24.504	23.458	24.831	11.998	11.08	13.917
BnaC09g19750D	BnaSYP22e	1.359	1.24	1.347	0.962	1.114	1.304
BnaC05g24420D	BnaSYP24a	7.815	9.415	5.707	3.696	3.645	4.186
BnaA09g24450D	BnaSYP24b	5.85	6.004	5.667	6.648	6.908	7.311
BnaA01g08630D	BnaSYP25	18.727	11.842	20.748	26.821	22.725	30.679
BnaA03g43290D	BnaSYP26	13.488	12.792	15.039	6.098	5.808	7.302
BnaA07g02590D	BnaSYP27	1.663	1.444	2.1	2.048	2.29	1.994
BnaC07g34680D	BnaSYP28	17.355	14.858	22.148	7.836	6.55	10.997
BnaCnng36920D	BnaSYP29	10.314	7.373	15.735	9.635	7.977	10.687
BnaA03g01750D	BnaSYP31a	5.572	5.584	5.89	3.299	3.002	3.571
BnaC03g02260D	BnaSYP31b	7.822	7.783	7.745	3.85	3.524	4.371
BnaA10g09000D	BnaSYP31c	1.017	0.861	0.739	0.642	0.963	1.046
BnaA10g24800D	BnaSYP31d	0	0	0	0	0	0
BnaA01g23010D	BnaSYP32a	9.377	9.421	9.364	5.757	5.298	5.46
BnaA03g37320D	BnaSYP32b	2.874	2.887	2.943	2.702	3.025	2.058
BnaC03g43700D	BnaSYP32c	3.398	3.085	2.853	2.507	2.829	2.105
BnaA07g05660D	BnaSYP32d	16.889	15.656	18.481	9.871	9.711	10.322
BnaCnng50850D	BnaSYP32e	10.646	9.767	12.9	6.462	6.422	6.859
BnaCnng54570D	BnaSYP32f	7.562	8.139	8.325	4.51	4.784	4.858
BnaA09g00660D	BnaSYP43a	6.341	6.751	7.742	4.048	4.03	4.335
BnaCnng23310D	BnaSYP43b	5.222	4.868	5.535	2.985	2.939	2.656
BnaA05g31560D	BnaSYP44	2.95	2.809	3.303	2.758	2.583	3.245
BnaC05g46100D	BnaSYP45	4.18	3.966	4.264	3.326	3.517	3.173
BnaAnng02730D	BnaSYP46	13.125	12.815	14.183	10.09	10.004	9.828
BnaA06g02090D	BnaSYP81a	4.115	3.793	3.695	3.844	3.96	3.329
BnaC06g04900D	BnaSYP81b	4.125	4.024	4.483	5.289	5.868	5.411
BnaC06g09010D	BnaSYP82	1.311	1.245	1.298	1.104	1.185	1.313
BnaC06g09020D	BnaSYP83	5.724	5.349	5.416	6.775	7.768	5.55
BnaC05g12340D	BnaSYP51a	13.577	12.288	13.996	15.75	15.157	15.315
BnaA06g10830D	BnaSYP51b	8.415	7.612	8.989	6.867	6.897	6.449
BnaC08g38470D	BnaSYP51c	10.172	10.084	8.718	3.984	4.006	4.702
BnaA09g56390D	BnaSYP51d	13.555	13.313	13.627	8.088	8.33	8.762
BnaA02g19290D	BnaSYP52a	15.654	15.467	14.849	5.389	5.185	7.713
BnaC06g39950D	BnaSYP52b	38.098	38.337	33.9	17.409	17.162	19.335
BnaA07g35020D	BnaSYP52c	19.989	17.713	19.513	9.194	9.252	10.408
BnaAnng27700D	BnaSYP52d	13.44	11.904	13.169	6.013	5.148	7.519
BnaC03g58730D	BnaSYP61a	5.337	5.338	5.588	4.332	3.967	4.621
BnaC05g21920D	BnaSYP61b	6.844	5.987	7.401	5.534	6.119	5.202
BnaA07g08320D	BnaSYP61c	14.19	11.296	13.513	10.951	10.302	11.022
BnaC07g10300D	BnaSYP61d	10.718	9.595	10.422	9.992	9.22	10.695
BnaA08g18280D	BnaSYP61e	6.397	6.317	7.068	8.031	8.038	7.646
BnaA09g27220D	BnaSYP61f	3.815	3.885	4.209	3.97	3.795	3.889
BnaA07g36570D	BnaSYN61a	6.759	5.719	8.212	8.741	8.826	9.011
BnaC07g11650D	BnaSYN61b	8.363	7.183	10.559	10.742	11.058	11.954
BnaA08g18800D	BnaSYN61c	0.008	0	0.031	1.46	1.455	1.42
BnaCnng57150D	BnaSYN61d	2.143	2.388	3.777	1.879	1.933	2.034
BnaA07g01630D	BnaSYN62a	10.086	8.792	7.845	3.36	3.554	5.027
BnaC07g02930D	BnaSYN62b	9.117	9.936	7.329	4.669	4.01	6.93
BnaA01g06780D	BnaSYN63a	15.073	17.052	10.74	6.136	5.553	7.756
BnaC01g08170D	BnaSYN63b	9.124	10.649	6.898	4.578	5.049	6.237
BnaC03g21260D	BnaSYN63c	0.719	0.759	0.661	0.368	0.376	0.409
BnaC03g68000D	BnaSYN63d	8.14	8.589	6.885	4.443	4.647	5.16
BnaA08g13120D	BnaSYN63e	8.111	8.837	8.104	3.444	3.379	4.795
BnaA01g32080D	BnaSYP71a	7.677	7.523	8.347	7.641	7.572	6.084
BnaC01g38990D	BnaSYP71b	13.757	13.118	12.832	13.956	13.048	14.103
BnaA05g28800D	BnaSYP71c	30.989	28.721	31.068	22.481	22.78	21.52
BnaC05g30860D	BnaSYP71d	3.237	3.183	4.212	4.31	4.428	4.897
BnaC05g43270D	BnaSYP71e	23.606	21.996	22.704	21.528	21.155	21.855
BnaC03g55260D	BnaSYP72a	0	0	0	0	0	0
BnaA06g38790D	BnaSYP72b	0	0	0	0	0	0
BnaC08g31380D	BnaSYP73a	0.342	0.137	0.307	0	0	0
BnaA09g39190D	BnaSYP73b	0.108	0.159	0.124	0.071	0.072	0.186
BnaC08g29100D	BnaBET11c	15.876	15.637	15.601	13.463	12.966	15.874
BnaA09g37300D	BnaBET11d	6.241	5.505	5.677	3.97	3.796	4.905
BnaA08g05320D	BnaBET11a	10.457	10.536	9.518	6.221	5.796	6.472
BnaC08g09580D	BnaBET11b	9.195	9.86	8.502	6.522	7.642	6.272
BnaC06g16360D	BnaBET13	12.234	11.35	10.129	10.379	9.845	11.597
BnaA07g17650D	BnaBET14	9.487	8.939	8.52	5.397	4.787	5.035
BnaC03g58880D	BnaSFT13	10.029	10.484	10.915	4.808	4.652	5.495
BnaA07g36490D	BnaSFT14	10.252	9.555	9.5	6.233	5.712	6.448
BnaC07g10140D	BnaSFT15	12.857	13.298	12.584	7.913	6.431	7.945
BnaA08g18180D	BnaSFT16	10.293	9.993	10.7	6.272	5.889	6.499
BnaC04g55600D	BnaUSE13	0	0	0	0	0	0
BnaC08g26520D	BnaUSE14	6.073	5.834	6.007	3.271	3.304	3.433
BnaC08g26540D	BnaUSE15	5.297	5.195	5.279	5.179	4.86	5.62
BnaA09g35220D	BnaUSE16	9.556	8.597	8.66	4.492	4.072	5.361
BnaC08g25610D	BnaSNAP23	0.012	0.025	0.026	0.014	0.031	0.029
BnaA09g45980D	BnaSNAP29	0.008	0	0	0	0	0.01
BnaC08g40050D	BnaSNAP30	0.016	0	0.008	0	0	0
BnaC02g42100D	BnaSNAP31a	12.913	12.64	39.29	1.242	1.355	2.316
BnaAnng06850D	BnaSNAP31b	3.669	3.779	7.212	1.776	1.651	2.984
BnaA03g02260D	BnaSNAP32	0.346	0.374	0.487	0.148	0.196	0.093
BnaA03g40020D	BnaSNAP34a	38.165	38.264	51.907	9.244	9.712	9.952
BnaC07g31080D	BnaSNAP34b	39.613	36.829	105.063	8.216	8.463	9.477
BnaA10g23370D	BnaSNAP38	1.372	1.314	1.423	0.845	0.898	1.04
BnaC09g48020D	BnaSNAP39	4.037	4.695	4.776	5.498	5.54	6.213
BnaA03g37300D	BnaSEC20a	2.369	1.981	2.797	2.85	3.018	3.684
BnaC03g43610D	BnaSEC20b	3.304	3.369	3.35	3.668	3.706	4.011
BnaA07g05710D	BnaSEC20c	7.422	6.974	7.641	5.615	5.236	4.863
BnaC07g08480D	BnaSEC20d	5.945	6.11	5.996	4.02	4.098	4.075
BnaC04g08330D	BnaMEMB13	0.181	0.107	0.117	0.128	0.131	0.124
BnaA05g07500D	BnaMEMB14	12.285	12.796	10.198	7.328	7.092	6.995
BnaC05g12110D	BnaGOS11a	12.197	12.352	12.279	6.228	6.148	7.529
BnaA06g10560D	BnaGOS11b	9.904	9.981	10.843	3.781	3.581	4.907
BnaA08g23720D	BnaGOS11c	5.669	6.021	5.137	1.25	1.134	1.675
BnaC08g16810D	BnaGOS11d	3.511	3.624	2.705	2.749	2.286	3.02
BnaC08g38620D	BnaGOS11e	13.755	12.042	14.84	7.054	6.044	8.12
BnaA09g56530D	BnaGOS11f	9.178	9.376	8.543	4.607	4.42	6.04
BnaA03g21120D	BnaGOS12a	4.27	4.121	4.559	4.989	4.505	4.908
BnaC03g25180D	BnaGOS12b	3.298	3.123	3.512	3.614	3.491	3.18
BnaC04g50160D	BnaGOS12c	10.002	8.969	8.637	6.771	6.867	6.547
BnaAnng30560D	BnaGOS12d	8.244	7.514	8.319	5.393	6.022	5.725
BnaA04g09380D	BnaVTI11a	36.779	37.446	35.935	14.495	13.966	16.008
BnaA04g09440D	BnaVTI11b	0	0	0	0	0	0
BnaC04g31610D	BnaVTI11c	52.291	49.796	51.314	20.157	19.59	23.248
BnaC06g12580D	BnaVTI11d	11.154	11.09	12.345	13.015	12.928	14.273
BnaA07g14720D	BnaVTI11e	10.789	10.133	11.133	8.277	8.212	8.106
BnaC09g16370D	BnaVTI11f	0	0	0.029	0.28	0.276	0.426
BnaA02g14320D	BnaVTI12a	15.83	14.628	15.765	11.432	10.492	12.366
BnaC02g19220D	BnaVTI12b	15.794	14.279	14.151	10.267	10.389	10.964
BnaC05g40940D	BnaVTI12c	1.113	1.199	0.982	1.384	1.628	1.228
BnaC06g20330D	BnaVTI12d	0.02	0	0.041	0	0	0
BnaC07g12350D	BnaVTI12e	8.832	7.926	8.135	5.462	4.422	5.875
BnaA07g09410D	BnaVTI12f	4.22	3.595	3.842	1.975	2.115	1.518
BnaA09g02560D	BnaVTI13a	3.868	3.011	2.896	3.581	3.616	4.511
BnaC09g02020D	BnaVTI13b	7.148	5.947	6.478	5.451	6.027	6.154
BnaCnng16780D	BnaNPSN13d	7.804	6.899	9.784	7.354	7.948	7.562
BnaA01g36970D	BnaNPSN13c	7.905	6.9	9.692	8.595	8.689	7.558
BnaCnng50640D	BnaNPSN13b	7.029	6.157	8.192	6.087	6.425	6.668
BnaA05g22740D	BnaNPSN13a	6.754	6.048	7.302	5.366	6.216	5.996
BnaC08g03740D	BnaNPSN12e	0.059	0.082	0.083	0.462	0.449	0.285
BnaA08g03440D	BnaNPSN12d	0	0	0	0.038	0	0.02
BnaA06g40480D	BnaNPSN12c	0.513	0.345	0.473	0.472	0.547	0.662
BnaC03g39990D	BnaNPSN12b	6.942	6.434	8.186	5.122	4.973	5.624
BnaA03g34530D	BnaNPSN12a	6.395	5.914	7.308	2.497	2.839	2.398
BnaAnng15710D	BnaNPSN11e	10.359	10.808	11.795	8.798	10.31	6.523
BnaA05g08760D	BnaNPSN11d	0.538	0.366	0.611	0.459	0.363	0.138
BnaC04g10150D	BnaNPSN11c	1.703	1.85	2.216	2.52	2.406	1.803
BnaC03g71990D	BnaNPSN11b	9.688	10.058	9.599	10.801	10.56	8.745
BnaA03g16130D	BnaNPSN11a	6.596	7.283	7.318	8.012	7.883	5.829
BnaC02g02250D	BnaTYN11a	3.505	3.625	3.876	2.946	3.136	2.999
BnaC09g49850D	BnaTYN11b	7.759	8.337	7.489	3.685	3.524	4.294
BnaA10g24920D	BnaTYN11c	5.218	5.745	5.83	2.812	2.813	3.048
BnaAnng01390D	BnaTYN11d	3.43	3.227	3.772	3.057	2.897	3.001
BnaA03g53420D	BnaTYN12a	4.2	3.439	5.675	0.972	0.923	0.857
BnaC05g26400D	BnaTYN12b	0	0	0	0	0	0
BnaA07g07530D	BnaTYN12c	0.019	0	0	0	0.024	0
BnaC07g45690D	BnaTYN12d	6.617	5.722	8.053	2.698	2.607	2.476
BnaC05g09870D	BnaSEC221a	4.1	4.604	3.809	2.691	3.064	2.534
BnaA06g08500D	BnaSEC221b	6.384	5.941	7.08	5.372	5.732	4.243
BnaA08g25060D	BnaSEC221c	18.431	18.942	20.12	14.599	13.675	13.671
BnaC08g15150D	BnaSEC221d	17.876	16.689	18.213	15.145	14.746	14.904
BnaA03g12680D	BnaSEC222a	0.258	0.323	0.199	0.064	0.014	0.027
BnaC03g15560D	BnaSEC222b	0.405	0.381	0.458	0.171	0.175	0.097
BnaC01g34310D	BnaSEC223	0.021	0	0.005	0.018	0.013	0.006
BnaC08g41760D	BnaSEC224	17.323	16.66	17.025	12.851	13.365	11.88
BnaA09g47480D	BnaSEC225	14.869	16.003	16.661	9.766	10.422	10.73
BnaA02g07910D	BnaYKT61a	32.036	31.464	32.444	16.453	14.823	16.857
BnaC02g11000D	BnaYKT61b	44.514	43.674	44.821	25.832	24.509	26.702
BnaC03g12420D	BnaYKT61c	0	0	0	0	0	0
BnaA05g25020D	BnaYKT61d	0	0	0.024	0.027	0.029	0.028
BnaC09g33590D	BnaYKT61e	27.913	27.149	26.437	17.776	17.795	19.206
BnaA10g29290D	BnaYKT61f	47.705	45.933	45.693	19.935	20.26	21.74
BnaA02g07810D	BnaYKT63	0	0	0	0	0	0
BnaC02g10880D	BnaYKT64	0	0	0	0	0	0
BnaA08g30600D	BnaVAMP711a	27.81	26.401	22.307	9.092	7.368	16.833
BnaA01g04780D	BnaVAMP711b	16.535	17.207	13.742	7.086	6.09	8.658
BnaC01g06320D	BnaVAMP711c	28.579	25.363	26.986	9.196	8.483	14.882
BnaC09g45410D	BnaVAMP713a	11.93	12.147	12.353	13.161	12.619	12.354
BnaA10g21300D	BnaVAMP713b	14.515	12.815	16.149	16.431	16.284	17.22
BnaA03g08500D	BnaVAMP714a	16.396	15.981	15.784	8.327	7.405	9.588
BnaC03g10830D	BnaVAMP714b	14.738	14.047	13.524	9.621	8.257	10.556
BnaA02g05590D	BnaVAMP715	13.685	10.356	13.812	5.965	5.401	7.355
BnaC08g00950D	BnaVAMP721a	45.512	40.494	48.596	23.152	21.311	23.019
BnaA08g28050D	BnaVAMP721b	28.514	27.697	30.851	15.839	15.604	15.197
BnaC08g43980D	BnaVAMP721c	9.162	9.046	8.826	8.61	8.257	8.724
BnaA09g50530D	BnaVAMP721d	12.177	12.063	12.427	12.197	12.756	12.174
BnaA10g02890D	BnaVAMP721e	47.101	46.171	45.45	35.158	34.116	33.772
BnaC05g02770D	BnaVAMP721f	41.402	39.344	40.781	29.363	26.108	28.597
BnaA03g15280D	BnaVAMP722/3a	45.573	49.43	45.072	17.628	17.1	19.607
BnaC03g18460D	BnaVAMP722/3b	28.998	30.196	29.479	15.696	15.402	14.527
BnaA04g19170D	BnaVAMP722/3c	0.867	1.512	1.435	0	0	0
BnaC04g11490D	BnaVAMP722/3d	57.29	59.279	69.882	21.827	21.342	22.725
BnaC04g43540D	BnaVAMP722/3e	0.702	1.081	1.174	0	0.008	0
BnaC04g43550D	BnaVAMP722/3f	0.024	0	0	0	0	0
BnaA05g10490D	BnaVAMP722/3g	73.299	74.146	88.268	29.484	28.869	29.76
BnaA03g14990D	BnaVAMP724/6/8a	0	0.004	0.004	0	0	0
BnaC03g18010D	BnaVAMP724/6/8b	0	0	0	0	0	0
BnaC03g18020D	BnaVAMP724/6/8c	0	0	0	0	0	0
BnaA04g18940D	BnaVAMP724/6/8d	0	0.012	0	0	0	0
BnaA04g18960D	BnaVAMP724/6/8e	0	0	0	0	0	0
BnaC04g12180D	BnaVAMP724/6/8f	0.168	0.106	0.146	0.011	0.012	0.034
BnaC04g43180D	BnaVAMP724/6/8g	1.197	0.972	1.284	0.066	0.029	0.055
BnaC04g43220D	BnaVAMP724/6/8h	0	0.036	0	0	0	0
BnaAnng16140D	BnaVAMP724/6/8i	0	0	0	0	0	0
BnaAnng16150D	BnaVAMP724/6/8j	0	0	0	0	0	0
BnaA08g05870D	BnaVAMP725a	0	0	0.013	0	0	0
BnaA01g18380D	BnaVAMP725b	8.866	7.779	10.994	9.167	9.626	8.905
BnaC01g22290D	BnaVAMP725c	8.358	7.925	10.932	9.826	9.915	9.576
BnaA04g04170D	BnaVAMP727a	23.594	21.321	22.378	12.314	11.045	13.52
BnaC04g26360D	BnaVAMP727b	5.712	5.564	4.502	5.464	6.442	6.416
BnaC06g15130D	BnaVAMP727c	14.382	13.851	13.578	10.018	8.525	10.985
BnaA07g16340D	BnaVAMP727d	20.657	18.997	18.656	14.116	14.212	15.506
BnaC08g25130D	BnaVAMP727e	29.656	29.063	31.72	13.768	14.042	15.715
BnaA09g34230D	BnaVAMP727f	8.245	7.685	8.272	2.374	1.772	2.734

## Sheet: S10
Table S10 RNA-seq expression of BnaSNAREs in leaves at 12 and 22 hours post inoculation with S. sclerotiorum.
Name	Gene_id	84039_0h	ZS9_0h	84039_12hpi	ZS9_12hpi	84039_22hpi	ZS9_22hpi	84039_12CK	ZS9_12CK	84039_22CK	ZS9_22CK	84039_12ckVS12h	84039_22ckVS22h	ZS9_12ckVS12h	ZS9_22ckVS22h
BnaKNOLLEa	BnaC05g06210D	2.64244	2.22783	1.06551	1.11291	1.37684	1.38783	1.20342	1.21838	2.47606	2.31387	-0.13325	-1.2259	-0.031876	-0.73609
BnaKNOLLEb	BnaA06g04950D	1.82621	1.32069	0.857587	0.944825	1.00344	0.446519	1.17658	1.03594	1.36733	0.81593	-0.48759	-0.32336	-0.012454	-0.59763
BnaKNOLLEc	BnaA08g26870D	0.288816	0.184697	0.142314	0.264715	0.100272	0	0.265131	0.238598	0.184681	0.113503	-0.84889	-0.73202	0.22342	NA
BnaKNOLLEd	BnaC08g13620D	0.841786	0.79006	0.195659	0.447258	0.370234	0.281072	0.504981	0.209802	0.338548	0.355671	-1.4456	0.60819	1.3438	0.18759
BnaSYP112a	BnaA06g25340D	0	0	0.0301076	0	0	0	0	0	0	0	NA	NA	NA	NA
BnaSYP112b	BnaC06g01410D	0	0.0358318	0	0	0	0	0	0	0	0	NA	NA	NA	NA
BnaSYP112c	BnaA07g01990D	0.101808	0.0339398	0.0926834	0	0.0813806	0.0341301	0.215325	0.194962	0.112551	0.0610042	-1.0527	-0.50611	NA	-0.24509
BnaSYP112d	BnaC07g03500D	0	0	0	0	0	0	0	0	0	0	NA	NA	NA	NA
BnaSYP112e	BnaAnng35230D	0	0	0	0	0	0	0	0	0	0	NA	NA	NA	NA
BnaSYP112f	BnaAnng38190D	0	0	0	0	0	0	0	0	0	0	NA	NA	NA	NA
BnaSYP121a	BnaA03g31960D	2.79831	3.53553	6.24251	6.20199	7.18551	6.83046	5.69665	5.38771	4.57481	4.63727	0.76294	3.0062	1.2247	2.7975
BnaSYP121b	BnaC03g73490D	2.5975	3.81529	6.48995	6.36352	7.15447	6.80307	6.19212	5.67071	4.34731	4.49127	0.49441	3.2366	1.084	2.9225
BnaSYP121c	BnaA05g27280D	1.77596	2.47849	6.69389	6.37908	7.22847	6.36557	5.58044	5.57189	2.79229	3.8196	1.3925	5.0034	1.1571	3.1669
BnaSYP121d	BnaC05g41390D	1.69533	2.70669	6.69655	6.32227	6.53737	6.10519	5.72706	5.79856	2.7625	3.48955	1.1948	4.3671	0.84152	3.2627
BnaSYP122a	BnaA03g41770D	0.0544739	0.199327	0.429225	0.23178	0.719628	0.956631	0	0.0514535	0.0998382	0.0770293	NA	3.5667	2.8289	4.613
BnaSYP122b	BnaA04g05470D	0.632762	1.56189	6.04518	6.77303	7.82918	7.87455	1.34031	2.07148	1.12001	1.97447	5.7179	7.9799	5.6316	6.9435
BnaSYP122c	BnaC04g28220D	1.07898	2.60706	6.15721	7.12391	8.03274	8.56791	1.77245	3.1162	1.15293	3.0123	5.178	8.09	4.6952	6.3847
BnaSYP122d	BnaC07g32850D	0.290955	0.194433	1.41355	0.752854	2.74842	2.03293	0.0988719	0.186347	0.230241	0.283856	4.9301	5.5809	2.742	4.3888
BnaSYP123a	BnaA09g01500D	0	0	0	0	0	0	0	0	0	0	NA	NA	NA	NA
BnaSYP123b	BnaC09g00640D	0	0	0	0	0	0	0	0	0.0276638	0	NA	NA	NA	NA
BnaSYP125a	BnaC05g08590D	0	0	0	0.0844392	0	0	0	0.0273244	0	0	NA	NA	1.7029	NA
BnaSYP125b	BnaA06g06940D	0.0716401	0.0344107	0	0.0859767	0.0267242	0.0330016	0.123189	0.162143	0.111406	0.0557506	NA	-2.051	-0.90811	0.063012
BnaSYP125c	BnaA08g25390D	0	0	0	0	0	0	0	0	0	0	NA	NA	NA	NA
BnaSYP125d	BnaC08g42150D	0	0	0	0	0	0	0	0	0	0	NA	NA	NA	NA
BnaSYP125e	BnaA09g47690D	0	0	0	0	0	0	0	0	0	0	NA	NA	NA	NA
BnaSYP125f	BnaAnng32640D	0	0	0	0	0	0	0	0	0	0	NA	NA	NA	NA
BnaSYP131a	BnaA01g33910D	0	0	0	0	0	0	0.0562786	0	0	0.0642436	NA	NA	NA	NA
BnaSYP131b	BnaA01g33920D	0	0	0	0	0	0	0	0	0	0	NA	NA	NA	NA
BnaSYP131c	BnaC01g40450D	0	0	0	0	0	0	0	0	0	0	NA	NA	NA	NA
BnaSYP131d	BnaA05g32710D	0	0	0	0	0	0	0	0	0	0	NA	NA	NA	NA
BnaSYP131e	BnaA05g32720D	0	0	0	0	0	0	0	0	0	0	NA	NA	NA	NA
BnaSYP131f	BnaC05g48000D	0.0731591	0	0	0	0	0	0	0	0	0.0661447	NA	NA	NA	NA
BnaSYP131g	BnaC05g48010D	0	0	0	0	0	0	0	0	0	0	NA	NA	NA	NA
BnaSYP133	BnaA09g18550D	1.94662	0	2.06156	0	2.22186	0	3.00456	0	2.65058	0	-0.99504	-0.12984	NA	NA
BnaSYP21a	BnaC02g06890D	0	0	0	0	0	0	0	0	0	0	NA	NA	NA	NA
BnaSYP21b	BnaA03g06240D	2.07477	2.50804	3.84952	4.13107	4.41662	4.68207	3.0549	3.3809	2.59617	2.85107	1.1131	2.3949	1.1434	2.5181
BnaSYP21c	BnaC03g08040D	2.04615	1.72133	5.19414	4.30604	6.35529	5.04024	3.80276	2.94203	3.51249	2.1137	1.6887	3.3431	1.8786	3.7905
BnaSYP21d	BnaC09g41030D	5.27678	5.24229	5.05129	4.98893	5.73531	5.48718	5.04	4.94276	5.66243	5.61924	0.22071	0.41178	0.37179	0.38998
BnaSYP21e	BnaA10g17660D	3.3799	3.17121	3.89781	4.01186	4.56354	4.54207	3.30359	3.084	3.53585	3.64541	0.89779	1.4493	1.418	1.4944
BnaSYP22a	BnaA02g24770D	1.87083	3.57035	3.05356	4.47701	2.80534	4.48235	2.52335	4.61928	2.364	4.30179	0.8477	0.84285	0.19099	0.71029
BnaSYP22b	BnaC02g32860D	3.13151	3.06458	4.58645	4.32288	4.08263	4.18611	4.34536	4.20987	4.1966	3.8064	0.45242	0.1779	0.48261	0.92892
BnaSYP22c	BnaA06g35880D	1.98633	2.62579	4.13677	4.01209	3.28605	3.20049	4.31978	4.24313	3.42759	3.59458	-0.0029149	0.14715	0.022144	0.083182
BnaSYP22d	BnaC07g19560D	3.08562	3.73396	5.14429	4.81884	5.05673	4.43835	5.65764	5.57719	5.65257	5.44418	-0.36748	-0.30846	-0.54539	-0.51351
BnaSYP22e	BnaC09g19750D	1.13271	1.13737	1.50675	1.30975	0.974226	1.10008	1.64122	1.72301	1.57931	1.63972	-0.037446	-0.79462	-0.45943	-0.3306
BnaSYP24a	BnaC05g24420D	2.18295	2.63678	3.74263	3.81092	3.67938	3.83247	2.93425	3.17032	2.52351	2.58329	1.1377	1.6548	1.0463	1.9706
BnaSYP24b	BnaA09g24450D	1.16713	3.04665	1.77144	3.3332	1.59536	3.11566	1.92965	3.68239	1.39792	3.23933	-0.054185	0.68407	-0.093335	0.38226
BnaSYP25	BnaA01g08630D	2.89858	3.14636	4.20195	4.11886	4.75915	4.11688	4.92421	5.07445	5.8904	5.80945	-0.62744	-0.84694	-0.84319	-1.1876
BnaSYP26	BnaA03g43290D	2.3553	2.51943	4.42752	3.96135	4.42924	3.93578	4.4964	4.41539	4.39896	4.07822	0.11723	0.33846	-0.19793	0.38557
BnaSYP27	BnaA07g02590D	0	0	0	0	0	0	0.0293076	0	0	0	NA	NA	NA	NA
BnaSYP28	BnaC07g34680D	2.7914	3.70845	5.48916	5.13587	5.77104	5.151	5.75368	5.84425	5.9626	5.91776	-0.11165	0.10937	-0.50165	-0.23483
BnaSYP29	BnaCnng36920D	1.50664	3.5469	2.8488	4.38988	3.14711	4.28382	3.72494	5.13668	3.97517	5.79562	-0.8481	-0.57804	-0.61841	-1.0228
BnaSYP31a	BnaA03g01750D	1.50756	1.93449	2.72538	2.55996	2.56397	2.24697	3.19054	3.08341	2.79838	2.99555	-0.32561	0.017486	-0.33336	-0.37759
BnaSYP31b	BnaC03g02260D	1.46751	2.09867	2.99384	2.82899	2.78104	2.27854	3.54306	3.3669	3.23226	2.90718	-0.43201	-0.24718	-0.37709	-0.21585
BnaSYP31c	BnaA10g09000D	0.0948532	0	0.28637	0	0.369814	0	0.321354	0	0.416809	0	0.0058606	0.18886	NA	NA
BnaSYP31d	BnaA10g24800D	0	0	0	0	0	0	0	0	0	0	NA	NA	NA	NA
BnaSYP32a	BnaA01g23010D	2.0071	2.36413	3.62171	2.75837	3.25855	2.04848	3.78818	3.16189	3.0004	2.43413	0.0059494	0.58802	-0.16436	0.014365
BnaSYP32b	BnaA03g37320D	0.0540729	0.357021	0.551942	0.746588	0.318549	0.623126	0.445457	0.364525	0.046519	0.16228	0.60715	3.2711	1.5756	2.7969
BnaSYP32c	BnaC03g43700D	0.576916	0.750739	1.47601	1.59527	0.975359	1.20472	1.06626	1.24269	0.573198	0.663416	0.93325	1.332	0.89888	1.6136
BnaSYP32d	BnaA07g05660D	1.41234	2.39064	3.04431	3.15057	2.68585	2.78305	3.37685	2.93565	2.72628	2.45469	-0.16695	0.25131	0.57287	0.92499
BnaSYP32e	BnaCnng50850D	2.48332	2.46239	3.84813	3.34409	3.86691	3.23071	3.67907	3.22822	3.04865	2.71397	0.38548	1.2427	0.45257	1.1305
BnaSYP32f	BnaCnng54570D	1.88579	2.45256	2.65759	2.67479	2.20714	2.29441	2.75917	2.77287	2.38939	2.39951	0.10854	0.074122	0.18357	0.36624
BnaSYP43a	BnaA09g00660D	1.42338	1.50665	2.90088	2.44386	2.18484	1.69717	2.79977	2.55344	1.76117	2.06754	0.3033	0.92839	0.077663	0.01994
BnaSYP43b	BnaCnng23310D	1.65766	1.90064	2.59452	2.38262	2.40194	2.34675	2.27682	2.39238	2.10257	2.01448	0.58971	0.70961	0.29763	0.98174
BnaSYP44	BnaA05g31560D	2.36511	1.87618	2.55061	1.56847	2.33837	1.27537	2.63212	1.72526	2.75206	1.95578	0.071382	-0.16343	-0.037672	-0.51842
BnaSYP45	BnaC05g46100D	0.0317432	1.4162	0	1.70899	0	1.31328	0	1.71444	0	1.58425	NA	NA	0.3223	0.082738
BnaSYP46	BnaAnng02730D	1.93717	1.22528	3.04247	1.10695	2.84992	1.1876	2.93908	1.3955	2.61948	1.16747	0.34223	0.59581	-0.2075	0.56406
BnaSYP81a	BnaA06g02090D	0.745469	1.51966	1.14828	1.74873	0.900664	1.44178	1.27275	2.12309	1.27715	2.05854	-0.015695	-0.41612	-0.25344	-0.37
BnaSYP81b	BnaC06g04900D	1.38275	2.00392	2.27221	2.41661	2.28533	2.12595	2.32205	2.72648	2.30873	2.64244	0.10954	0.2631	-0.097438	-0.12734
BnaSYP82	BnaC06g09010D	0.763751	0.370781	0.141409	0.181745	0.14511	0.299281	0.109191	0.318675	0.491871	0.942077	0.54326	-1.5919	-0.47276	-1.5337
BnaSYP83	BnaC06g09020D	1.57469	1.91719	2.1702	2.15528	2.13662	1.8801	2.28572	2.20505	2.10347	2.1781	0.05599	0.32657	0.19942	0.13233
BnaUSE13	BnaC04g55600D	0	0	0	0	0	0	0	0	0	0	NA	NA	NA	NA
BnaUSE14	BnaC08g26520D	0.148851	1.60255	0.658687	2.35445	0.376464	2.04882	0.765085	1.81726	0.534002	1.74174	-0.081747	-0.24516	1.1019	0.9245
BnaUSE15	BnaC08g26540D	1.17954	2.35872	1.1337	2.62249	1.02011	2.41768	1.20399	3.07802	1.09987	3.21399	0.097374	0.17797	-0.32015	-0.4384
BnaUSE16	BnaA09g35220D	2.07637	2.53419	3.01699	2.98075	2.20913	2.79599	3.18616	3.4156	2.2611	2.66607	0.015661	0.21953	-0.2269	0.68181
BnaSEC20a	BnaA03g37300D	0	0.160245	0.0585699	0.0882694	0.203003	0.0750529	0.136596	0.0574625	0.0855256	0.0880143	-1.0032	1.4895	0.74342	0.32347
BnaSEC20b	BnaC03g43610D	2.52369	2.48032	2.95377	2.71017	2.35818	2.11111	3.32188	3.18154	2.82647	2.86607	-0.25922	-0.2877	-0.33997	-0.41908
BnaSEC20c	BnaA07g05710D	1.77046	2.43257	2.29577	2.6223	1.88334	2.61814	2.40848	2.92667	2.03196	2.42195	0.058336	0.070635	-0.056812	0.72148
BnaSEC20d	BnaC07g08480D	1.82064	2.1569	2.83613	2.56709	2.32642	2.36433	2.74027	2.84734	2.08043	2.25438	0.32354	0.59224	-0.027314	0.66696
BnaMEMB13	BnaC04g08330D	0.0403932	3.37384	0	4.12957	0	4.3229	0	3.96199	0	3.36887	NA	NA	0.5023	1.5484
BnaMEMB14	BnaA05g07500D	1.8927	2.47563	3.87702	3.64285	3.37485	3.20479	3.74999	3.4881	2.52589	2.52685	0.33003	1.3073	0.48808	1.3339
BnaGOS11a	BnaC05g12110D	2.90582	3.53379	4.27038	4.0427	3.91595	3.81979	4.3726	4.49248	4.19373	3.92146	0.093945	-0.016235	-0.21367	0.43036
BnaGOS11b	BnaA06g10560D	2.93302	3.22103	4.23789	3.98562	3.97539	4.11444	4.42434	4.14696	3.8639	3.21316	0.0044232	0.43691	0.15775	1.5023
BnaGOS11c	BnaA08g23720D	0	0	0.0421443	0	0	0	0	0	0	0	NA	NA	NA	NA
BnaGOS11d	BnaC08g16810D	1.46469	1.95503	2.63709	2.59648	2.09482	2.20056	2.85563	2.83995	2.13888	2.2048	-0.051924	0.23892	0.050065	0.54222
BnaGOS11e	BnaC08g38620D	1.45993	3.04328	4.27721	3.89635	3.98641	3.47345	4.47182	4.24729	3.82408	3.93678	-0.034755	0.48424	-0.10016	0.061035
BnaGOS11f	BnaA09g56530D	2.71215	2.73203	4.42556	3.51056	4.04209	3.287	4.50946	3.89247	4.06275	3.64539	0.12067	0.28903	-0.13283	0.14377
BnaGOS12a	BnaA03g21120D	1.29244	2.09274	1.59268	2.37348	1.33772	1.38815	2.19576	2.55065	1.64038	2.11012	-0.67618	-0.19813	-0.0063549	-0.53786
BnaGOS12b	BnaC03g25180D	1.76087	2.11601	2.56007	2.29669	1.71207	1.45507	2.94129	2.7067	2.40707	2.11442	-0.26187	-0.635	-0.2296	-0.41103
BnaGOS12c	BnaC04g50160D	1.37091	2.76313	2.27867	3.29948	1.52299	2.30147	2.80193	3.47692	2.07589	2.81172	-0.40891	-0.5338	0.058464	-0.077006
BnaGOS12d	BnaAnng30560D	1.30806	1.55792	2.39382	2.23799	1.7137	1.80512	2.467	2.43107	1.85654	1.68537	0.11037	0.079926	0.079546	0.66052
BnaVTI11a	BnaA04g09380D	4.62967	5.03026	6.14762	6.04254	6.07266	6.15319	5.75331	5.93681	5.22449	5.37639	0.6235	1.1978	0.47217	1.3192
BnaVTI11b	BnaA04g09440D	0	0	0	0	0	0	0	0	0	0.0885977	NA	NA	NA	NA
BnaVTI11c	BnaC04g31610D	4.8988	5.09447	6.05815	5.97291	6.06137	6.19675	5.84334	6.00974	5.67719	5.7527	0.44144	0.69715	0.32272	0.96873
BnaVTI11d	BnaC06g12580D	3.02668	3.33617	3.59984	3.73122	3.46731	3.36389	4.18102	4.31804	4.03072	4.08293	-0.44358	-0.3356	-0.38884	-0.2579
BnaVTI11e	BnaA07g14720D	1.26116	1.82409	2.27914	2.23616	1.90184	1.73958	2.45696	2.38513	2.09939	2.31538	-0.023486	0.030478	0.099339	-0.26621
BnaVTI11f	BnaC09g16370D	1.42742	0.874385	0.946427	0.478227	0.721338	0.637154	1.48632	1.10429	1.81777	1.71639	-0.83287	-1.654	-1.4707	-1.53
BnaVTI12a	BnaA02g14320D	2.61725	3.13185	3.84082	3.54072	3.45479	3.2642	4.04129	4.01907	3.79581	3.74382	-0.021317	-0.081482	-0.23113	-0.012275
BnaVTI12b	BnaC02g19220D	2.25298	4.0284	2.33823	4.45979	2.32458	4.24651	2.62493	4.8786	2.35309	4.57203	-0.18958	0.2813	-0.16168	0.18442
BnaVTI12c	BnaC05g40940D	0.920519	0.915791	2.1581	1.73608	1.27379	2.15041	1.60139	1.88146	1.29957	1.38727	0.96214	0.23548	0.10746	1.5422
BnaVTI12d	BnaC06g20330D	0	0	0	0	0	0	0	0	0	0	NA	NA	NA	NA
BnaVTI12e	BnaC07g12350D	2.15235	3.01036	4.1616	4.10531	3.60703	3.93785	4.05082	4.13185	3.18375	3.62622	0.31328	0.77779	0.28913	0.84527
BnaVTI12f	BnaA07g09410D	0.750677	0.931977	1.97052	1.94909	1.51692	3.1271	1.49746	0.95591	0.915994	0.549739	0.91915	1.3637	2.1225	4.6033
BnaVTI13a	BnaA09g02560D	2.5474	2.62576	4.21459	3.88976	4.06821	3.77146	4.23511	4.31771	3.40337	3.62547	0.12865	0.97689	-0.12239	0.65095
BnaVTI13b	BnaC09g02020D	3.08553	2.85806	4.53092	4.02913	3.96415	3.4881	4.86515	4.37993	3.91366	3.64741	-0.13156	0.33374	-0.090547	0.3877
BnaNPSN11a	BnaA03g16130D	2.40421	1.69116	2.72794	1.49367	1.38796	0.703143	3.24001	1.79163	2.25583	1.34274	-0.42058	-0.95217	-0.22863	-0.76343
BnaNPSN11b	BnaC03g71990D	1.75905	2.39153	2.79746	2.60443	1.70518	1.39544	3.25919	3.11182	2.08669	2.12939	-0.37438	-0.22642	-0.39914	-0.5053
BnaNPSN11c	BnaC04g10150D	0.646396	1.0325	1.0756	0.978545	0.607133	0.334182	1.41036	1.38384	0.611317	0.834761	-0.43828	0.19614	-0.60016	-1.0073
BnaNPSN11d	BnaA05g08760D	0.248779	0.272427	0.0352314	0.0957851	0	0	0.179854	0.319134	0.0653478	0.271657	-2.3783	NA	-1.7646	NA
BnaNPSN11e	BnaAnng15710D	1.75087	1.99863	2.4025	1.67739	1.64998	0.725621	2.64473	1.78578	1.81678	1.51546	-0.099154	0.075317	0.10185	-1.0055
BnaNPSN12a	BnaA03g34530D	1.68589	1.35879	2.58284	2.44261	1.98427	1.45235	3.21869	2.95133	2.58351	2.41986	-0.52361	-0.47886	-0.32807	-0.81382
BnaNPSN12b	BnaC03g39990D	2.39507	2.72538	3.6618	3.65524	2.95021	2.11399	4.78196	4.6075	3.7806	3.8838	-1.0106	-0.67707	-0.83307	-1.5253
BnaNPSN12c	BnaA06g40480D	0.137411	0.291362	0.478991	0.258894	0.176947	0.48505	0.911578	0.511585	0.612636	0.46635	-1.0346	-1.6423	-0.62685	0.54384
BnaNPSN12d	BnaA08g03440D	0	0.123458	0.215185	0.109851	0.051442	0	0.286975	0.204092	0.165825	0.0585682	-0.14723	-1.6046	-0.9095	NA
BnaNPSN12e	BnaC08g03740D	0.920992	0.900493	1.37444	1.37367	1.05461	0.546874	2.45904	2.03866	1.77665	1.62626	-1.3744	-0.89975	-0.80219	-1.6276
BnaNPSN13a	BnaA05g22740D	2.43159	3.00937	2.18373	2.82687	2.20137	2.09744	2.97937	3.50487	2.91964	3.49996	-0.76689	-0.54601	-0.53632	-1.1517
BnaNPSN13b	BnaCnng50640D	2.26549	2.43447	3.1546	2.62903	2.64298	2.10679	3.513	3.24974	3.43575	3.10786	-0.21675	-0.59604	-0.48518	-0.68014
BnaNPSN13c	BnaA01g36970D	2.25789	2.77624	3.08968	3.00192	2.7313	2.57898	3.26369	3.14434	3.11585	3.06778	-0.0098478	-0.13005	0.13011	-0.042301
BnaNPSN13d	BnaCnng16780D	2.84763	2.87677	3.28907	3.00788	3.03291	2.73961	3.55589	3.52439	3.39495	3.3016	-0.10583	-0.093095	-0.35369	-0.14089
BnaSYN61a	BnaA07g36570D	2.75371	2.97328	2.43802	2.93853	2.85755	3.34028	2.18479	2.88125	2.52693	3.37038	0.53561	0.6888	0.36411	0.4881
BnaSYN61b	BnaC07g11650D	3.39041	3.62489	3.25346	3.28874	4.1255	3.99089	2.97177	3.21595	3.49822	3.59574	0.51959	1.0031	0.37617	0.94437
BnaSYN61c	BnaA08g18800D	1.03147	0.780052	0.907644	0.477192	1.5279	0.619854	0.571519	0.589593	0.885038	0.785989	1.1338	1.4902	-0.063223	0.073906
BnaSYN61d	BnaCnng57150D	0.887151	1.38864	1.51588	2.44385	3.09196	3.37956	0.339211	0.529602	0.635496	1.07545	3.0652	4.0971	3.7926	3.6168
BnaSYN62a	BnaA07g01630D	2.86754	3.00279	3.02512	2.98845	2.34697	1.92341	3.65299	3.43823	3.48291	3.94896	-0.50827	-1.0383	-0.3123	-1.8674
BnaSYN62b	BnaC07g02930D	2.72691	3.20996	2.64091	2.7508	2.35089	1.90139	3.4802	3.35689	3.41837	3.70406	-0.75161	-1.0081	-0.43436	-1.6584
BnaSYN63a	BnaA01g06780D	3.25886	3.70116	4.57341	4.50303	4.10038	4.06476	4.50481	4.47248	3.79374	4.08084	0.28376	0.66118	0.31661	0.49348
BnaSYN63b	BnaC01g08170D	2.78563	2.92452	3.96842	3.79164	3.64333	3.48794	3.70849	3.8805	3.36794	3.39811	0.5073	0.62696	0.202	0.63561
BnaSYN63c	BnaC03g21260D	0.560037	0.680204	1.25353	1.09802	1.06803	1.24245	0.841629	0.63623	0.640111	0.472417	1.0324	1.3237	1.3867	2.3772
BnaSYN63d	BnaC03g68000D	2.63786	3.02678	4.88702	4.50772	4.77422	4.86203	3.98938	3.87556	3.2446	3.2556	1.1778	1.9839	1.0473	2.2534
BnaSYN63e	BnaA08g13120D	1.0611	1.28	2.4194	2.51407	2.92202	2.76374	2.22586	2.10644	2.10588	1.86666	0.47907	1.3478	0.81312	1.6667
BnaSYP51a	BnaC05g12340D	2.53322	2.83587	3.90299	3.52569	3.50936	2.89953	4.28145	4.10237	3.79276	3.61468	-0.22522	-0.0062367	-0.40395	-0.28456
BnaSYP51b	BnaA06g10830D	1.71959	2.8887	3.22945	2.98478	2.01666	1.99793	3.32678	3.82901	2.57996	2.89562	0.016694	-0.49117	-0.73348	-0.59985
BnaSYP51c	BnaC08g38470D	1.89136	2.28037	3.37618	3.11449	2.97321	2.94842	3.14065	3.06503	2.413	2.55088	0.49929	0.97336	0.3452	0.96261
BnaSYP51d	BnaA09g56390D	1.83725	2.17725	2.48689	2.40023	1.65796	1.67565	2.79005	2.86708	2.17923	2.21055	-0.20062	-0.44261	-0.31478	-0.22995
BnaSYP52a	BnaA02g19290D	3.00669	2.1875	5.42698	3.62596	5.57845	4.07465	5.22211	3.88357	5.62138	3.86226	0.40843	0.26488	0.025866	0.75264
BnaSYP52b	BnaC06g39950D	4.52132	4.95945	6.09429	5.90613	5.87539	5.86036	5.96594	5.82932	5.40171	5.3421	0.35347	0.80287	0.42696	1.0557
BnaSYP52c	BnaA07g35020D	3.24274	2.74702	4.5383	3.52718	4.29928	3.30054	4.49889	3.59481	4.03793	3.13663	0.25417	0.5998	0.25032	0.70045
BnaSYP52d	BnaAnng27700D	2.72342	3.43042	5.04236	5.00252	4.92779	4.95418	5.03418	5.5922	5.27571	5.32442	0.19648	-0.077285	-0.32319	0.16991
BnaSYP61a	BnaC03g58730D	2.09575	3.14123	2.84253	3.47614	2.41107	3.19238	3.07478	3.85944	2.52178	3.45896	-0.060977	0.14216	-0.12028	0.22412
BnaSYP61b	BnaC05g21920D	2.7161	2.86468	2.96205	3.10891	2.72787	2.42212	3.41025	3.34082	3.00793	3.24332	-0.31199	-0.035211	-0.0048356	-0.46558
BnaSYP61c	BnaA07g08320D	2.1341	3.68369	3.22156	4.41862	2.94092	4.21446	3.78079	5.195	3.20619	5.29744	-0.45232	0.0057265	-0.60849	-0.58113
BnaSYP61d	BnaC07g10300D	3.65918	3.58938	4.16728	4.07892	4.38484	3.87066	4.82867	4.77702	4.93241	5.04347	-0.52102	-0.27065	-0.50432	-0.68865
BnaSYP61e	BnaA08g18280D	3.05471	2.7974	3.42968	3.14552	2.94244	2.65638	3.67793	3.34651	3.26639	2.91411	-0.078387	-0.052861	0.041603	0.22392
BnaSYP61f	BnaA09g27220D	2.35682	2.22336	3.04365	2.80378	2.40571	2.49935	3.10034	3.0653	2.88345	2.97464	0.12448	-0.24616	-0.0059885	-0.037088
BnaSYP71a	BnaA01g32080D	2.89501	3.17876	3.63258	3.15577	3.03261	2.79271	3.8855	3.60116	3.41604	3.23557	-0.072858	-0.14122	-0.24414	0.0065427
BnaSYP71b	BnaC01g38990D	0.174085	0	0.127567	0	0.0300053	0	0.184723	0	0.0983121	0	-0.36487	-1.6046	NA	NA
BnaSYP71c	BnaA05g28800D	3.83102	3.85651	5.72304	5.1821	5.39395	4.78104	5.96679	5.08912	5.36795	4.42321	-0.017169	0.32471	0.43831	0.88019
BnaSYP71d	BnaC05g30860D	2.92784	2.99453	3.49881	3.21115	3.40866	2.67362	3.93768	3.70338	3.62304	3.54433	-0.34588	0.069202	-0.35695	-0.44763
BnaSYP71e	BnaC05g43270D	4.26755	4.68414	5.88041	5.49912	5.5346	5.30986	5.63256	5.66225	5.64047	5.37825	0.44935	0.21791	0.14867	0.44913
BnaSYP72a	BnaC03g55260D	0	0	0	0	0	0	0	0	0	0	NA	NA	NA	NA
BnaSYP72b	BnaA06g38790D	0	0	0	0	0	0	0	0	0	0	NA	NA	NA	NA
BnaSYP73a	BnaC08g31380D	0	0	0.159468	0.0650112	0.0568537	0	0.0629499	0.0332645	0	0	1.7186	Inf	1.0451	NA
BnaSYP73b	BnaA09g39190D	0	0.0748683	0	0.0350823	0	0	0	0	0	0	NA	NA	Inf	NA
BnaBET11a	BnaA08g05320D	1.78655	2.03351	2.66893	2.20749	2.0281	1.3435	2.31146	2.39077	1.91327	2.00704	0.62881	0.44504	-0.047454	-0.4468
BnaBET11b	BnaC08g09580D	2.1886	2.41413	3.51773	3.34163	3.03532	3.03269	3.30763	3.20953	2.51125	2.68265	0.47325	0.95729	0.45753	0.93753
BnaBET11c	BnaC08g29100D	5.15906	5.08362	5.96078	5.36866	5.49566	4.9247	6.15105	6.04672	5.75899	5.62018	-0.010312	0.017739	-0.44358	-0.18356
BnaBET11d	BnaA09g37300D	2.93463	4.75571	3.98826	5.37346	3.53839	5.12413	4.162	5.88131	3.87564	5.5862	0.0035642	-0.097216	-0.25679	0.018276
BnaBET13	BnaC06g16360D	4.26827	4.19154	5.00744	4.7345	4.54638	4.42008	4.94802	5.12128	4.68017	4.8745	0.2415	0.14711	-0.11313	0.050657
BnaBET14	BnaA07g17650D	2.46365	2.66049	3.14174	2.46967	2.93142	2.29778	3.24334	2.68726	3.255	2.68502	0.04772	-0.055798	0.070952	0.038605
BnaSFT13	BnaC03g58880D	2.24365	2.92958	3.30852	3.52725	3.21679	3.8352	2.6424	3.50583	2.44804	3.09871	1.0319	1.2177	0.41541	1.3149
BnaSFT14	BnaA07g36490D	3.45131	3.17328	4.71696	4.19551	3.94043	3.48209	4.66118	4.41884	3.72691	3.60762	0.28025	0.53667	0.039648	0.39783
BnaSFT15	BnaC07g10140D	3.67616	3.97243	5.5611	5.33439	5.16411	5.09972	5.29024	5.40868	4.54441	4.57429	0.51041	0.96018	0.20413	1.081
BnaSFT16	BnaA08g18180D	3.30223	2.71969	4.81216	3.46235	4.98878	3.46094	3.55908	2.97247	3.16756	2.62243	1.6165	2.2773	0.956	1.5023
BnaSNAP23	BnaC08g25610D	0.471939	0.0492111	0.803253	0	0.56603	0	1.17764	0.116809	1.10007	0.0808686	-0.6371	-1.0101	NA	NA
BnaSNAP29	BnaA09g45980D	0	0	0	0	0	0	0	0	0	0	NA	NA	NA	NA
BnaSNAP30	BnaC08g40050D	0	0.036701	0	0	0	0	0	0	0	0	NA	NA	NA	NA
BnaSNAP31a	BnaC02g42100D	1.06692	1.80716	3.91012	3.50661	3.75629	4.16531	2.34663	3.07593	1.00582	0.952699	1.9604	3.9987	0.86707	4.7157
BnaSNAP31b	BnaAnng06850D	1.63437	1.80912	4.08638	3.93732	2.67144	2.83427	2.8292	3.77605	0.798027	1.58955	1.598	3.167	0.35952	2.1396
BnaSNAP32	BnaA03g02260D	0.170938	0.0349889	0	0.0299948	0.0271744	0	0.0259234	0.0303534	0.0590319	0.0909983	NA	-1.0097	0.045143	NA
BnaSNAP34a	BnaA03g40020D	1.74925	2.44844	4.59117	4.47577	4.96328	4.96808	3.64652	3.63871	2.28203	2.91308	1.2459	3.3175	1.264	2.7575
BnaSNAP34b	BnaC07g31080D	2.83348	3.902	6.25755	5.85932	6.59967	6.13698	5.00346	4.87611	3.49864	3.98678	1.526	3.5525	1.3862	2.7653
BnaSNAP38	BnaA10g23370D	0.355371	0.613386	0.422782	0.588347	0.406535	0.286487	0.590743	0.599777	0.74091	0.509556	-0.4265	-0.8134	0.18184	-0.47023
BnaSNAP39	BnaC09g48020D	1.43539	1.70247	1.53788	1.6843	1.53654	1.50138	1.72902	1.7467	1.236	1.52964	-0.081595	0.73289	0.23243	0.46332
BnaSEC221a	BnaC05g09870D	1.36725	1.52961	2.24376	2.10251	1.65459	2.04709	1.93186	2.17301	1.71446	1.94601	0.62863	0.20398	0.21525	0.64357
BnaSEC221b	BnaA06g08500D	1.14684	1.55226	1.74305	1.69027	1.46848	1.10238	1.91997	1.62608	1.4452	1.63175	-0.01632	0.31133	0.38281	-0.3131
BnaSEC221c	BnaA08g25060D	3.27371	3.17099	4.52548	4.1679	4.30667	4.08725	4.45214	4.45201	3.71539	3.83217	0.27247	0.9393	0.0031277	0.80019
BnaSEC221d	BnaC08g15150D	3.17958	3.59484	4.46655	4.29061	4.12077	4.01274	4.47503	4.36785	3.70111	3.69223	0.20541	0.77345	0.20986	0.86465
BnaSEC222a	BnaA03g12680D	0.18157	0.0430725	0.110857	0.0387299	0.16557	0.053775	0.0691076	0.112528	0	0.0382685	0.99715	NA	-1.507	0.9598
BnaSEC222b	BnaC03g15560D	0	0.0430776	0	0.0767141	0	0	0	0.146144	0	0.0381185	NA	NA	-0.83354	NA
BnaSEC223	BnaC01g34310D	0	0	0	0	0	0	0	0	0	0	NA	NA	NA	NA
BnaSEC224	BnaC08g41760D	1.25479	3.38963	2.71989	4.65321	2.40446	4.89973	1.9353	4.17128	1.38561	3.56696	1.2566	1.7307	0.92567	1.9172
BnaSEC225	BnaA09g47480D	3.30081	3.23108	4.33791	4.21203	4.50605	4.57219	3.66516	3.55161	3.14014	3.2884	0.97078	1.8283	1.1054	1.8854
BnaTYN11a	BnaC02g02250D	0	0	0.0234478	0	0	0	0.00759024	0	0	0	1.7829	NA	NA	NA
BnaTYN11b	BnaC09g49850D	1.51592	2.06704	2.50008	2.54814	2.1143	2.50955	2.36762	2.50786	2.07116	2.24722	0.37415	0.36582	0.38223	0.82825
BnaTYN11c	BnaA10g24920D	1.48594	1.70813	2.60941	2.16405	2.15024	2.05532	2.52662	1.90868	2.10469	1.87146	0.31724	0.36523	0.67503	0.75617
BnaTYN11d	BnaAnng01390D	1.64465	2.07958	2.19298	2.10207	1.91153	1.69805	2.36126	2.35395	2.28568	2.42671	-0.0031985	-0.19798	-0.033964	-0.46293
BnaTYN12a	BnaA03g53420D	0.548841	0.748025	0.720841	0.887954	0.693837	0.887028	0.552676	0.519696	0.337719	0.374456	0.70278	1.5733	1.2917	2.0026
BnaTYN12b	BnaC05g26400D	0	0	0	0	0	0	0	0	0	0	NA	NA	NA	NA
BnaTYN12c	BnaA07g07530D	0	0	0	0	0	0	0	0	0	0	NA	NA	NA	NA
BnaTYN12d	BnaC07g45690D	1.23936	1.14121	0.773668	0.728416	0.51904	0.517298	0.770477	0.66613	0.732727	0.743318	0.21801	-0.29674	0.38286	-0.12324
BnaYKT61a	BnaA02g07910D	4.33493	4.00682	5.78265	4.81586	5.50893	4.64065	5.41472	4.89051	5.26855	4.56842	0.61428	0.54852	0.30544	0.58991
BnaYKT61b	BnaC02g11000D	5.20175	5.68029	5.95862	5.93397	5.50512	6.02017	5.69343	6.04941	5.56477	5.74035	0.48528	0.24072	0.22645	0.80027
BnaYKT61c	BnaC03g12420D	0	0	0	0	0	0	0	0	0	0	NA	NA	NA	NA
BnaYKT61d	BnaA05g25020D	1.3529	0	1.96886	0	1.4733	0	2.04264	0	1.79611	0	0.10313	-0.1315	NA	NA
BnaYKT61e	BnaC09g33590D	4.74502	5.15215	5.48828	5.45487	5.13371	5.38765	5.25316	5.42772	5.09797	5.15433	0.46414	0.35826	0.39445	0.75972
BnaYKT61f	BnaA10g29290D	4.51633	4.74043	5.96733	5.71054	5.77719	5.74978	5.57952	5.50664	5.31939	5.13081	0.62802	0.78554	0.60008	1.1463
BnaYKT63	BnaA02g07810D	0	0	0	0	0	0	0	0	0	0	NA	NA	NA	NA
BnaYKT64	BnaC02g10880D	0	0	0	0	0	0	0	0	0	0	NA	NA	NA	NA
BnaVAMP711a	BnaA08g30600D	2.42325	4.3323	5.38113	4.96983	4.77047	4.24571	5.66682	5.76228	4.69597	4.71127	-0.12271	0.36566	-0.56392	0.028468
BnaVAMP711b	BnaA01g04780D	1.55673	2.44766	3.72415	3.24714	3.45207	2.90679	4.05374	3.97631	3.7116	3.46008	-0.1822	0.022614	-0.53611	-0.10984
BnaVAMP711c	BnaC01g06320D	2.27563	4.13915	4.66707	4.69281	4.68745	4.8031	4.90553	5.58232	4.93766	5.594	-0.074743	0.033895	-0.64015	-0.30056
BnaVAMP713a	BnaC09g45410D	3.02847	3.37893	4.89857	4.50658	4.45498	4.61315	4.28993	4.09057	3.00603	2.87461	0.8664	1.9086	0.83329	2.4314
BnaVAMP713b	BnaA10g21300D	4.15429	4.34536	4.71986	4.41768	3.89392	3.82344	4.76436	4.62163	3.73582	3.86166	0.15344	0.49896	0.072974	0.4765
BnaVAMP714a	BnaA03g08500D	3.27026	3.7429	5.02054	4.62086	4.39949	4.14047	5.20396	5.13814	4.25082	4.51261	-0.0017981	0.41767	-0.3119	0.13129
BnaVAMP714b	BnaC03g10830D	3.38091	4.03536	4.74187	4.75914	4.36014	4.69991	4.94568	5.25669	4.56331	5.00048	-0.02702	0.088068	-0.23674	0.22643
BnaVAMP715	BnaA02g05590D	3.32489	3.72648	4.91088	3.87751	4.20999	3.56694	4.96534	4.39843	4.36718	3.86498	0.1227	0.12885	-0.3383	0.19776
BnaVAMP721a	BnaC08g00950D	4.20086	4.47025	4.76835	4.70425	4.38046	4.00402	4.92225	5.01859	4.691	4.69266	0.052251	-0.04739	-0.071218	-0.21293
BnaVAMP721b	BnaA08g28050D	2.70854	3.94917	4.32602	5.12894	3.85208	4.61948	4.22824	5.38311	3.53965	4.6214	0.31322	0.65259	0.040891	0.53673
BnaVAMP721c	BnaC08g43980D	2.97688	3.14246	4.11112	3.65643	3.76201	3.28586	4.30669	4.06134	3.97771	3.73269	-0.034043	0.043823	-0.1852	0.020736
BnaVAMP721d	BnaA09g50530D	2.99394	3.37717	3.92722	3.8915	3.50506	3.30303	4.36283	4.18403	3.80623	3.76712	-0.26958	-0.039998	-0.03155	0.010701
BnaVAMP721e	BnaA10g02890D	3.56057	3.47136	4.93377	4.08181	4.64848	3.88278	4.97744	4.19118	4.67404	3.77446	0.15744	0.27828	0.18317	0.64323
BnaVAMP721f	BnaC05g02770D	4.775	5.4094	5.59509	5.77038	4.67952	5.01154	5.52614	5.86394	4.41934	4.94877	0.25485	0.60846	0.18026	0.59403
BnaVAMP722/3a	BnaA03g15280D	4.10394	3.38148	6.58225	5.12558	6.50532	5.38698	6.08755	4.60737	5.15017	3.84649	0.74016	1.6889	0.95282	2.1419
BnaVAMP722/3b	BnaC03g18460D	3.90025	4.3615	5.92046	6.09776	5.89849	6.46783	4.85119	5.17322	3.78333	4.51983	1.3654	2.5604	1.3848	2.5321
BnaVAMP722/3c	BnaA04g19170D	0	0	0.642796	0.86864	0.814654	2.14645	0.0712531	0.553033	0	0	3.7201	NA	1.1475	2.6667
BnaVAMP722/3d	BnaC04g11490D	5.24916	5.05423	6.64768	5.90731	6.72463	5.86315	6.27747	5.64857	5.50111	5.28951	0.60057	1.5726	0.62343	1.0951
BnaVAMP722/3e	BnaC04g43540D	0	0.114569	1.11531	0.821776	1.31262	2.80536	0	0.364325	0.0499975	0.362808	NA	5.447	1.9188	4.9272
BnaVAMP722/3f	BnaA05g10490D	4.00813	5.59808	5.03668	6.37879	5.14768	6.6494	4.61424	5.91667	3.84626	5.655	0.64683	1.6962	0.85954	1.5253
BnaVAMP724/6/8a	BnaA03g14990D	0	0	0.0391124	0.37559	0	0.874306	0	0	0	0	NA	NA	NA	NA
BnaVAMP724/6/8b	BnaC03g18010D	0	0	0	0	0	0	0	0	0	0	NA	NA	NA	NA
BnaVAMP724/6/8c	BnaC03g18020D	0	0	0	0	0	0	0	0	0	0	NA	NA	NA	NA
BnaVAMP724/6/8d	BnaA04g18940D	0	0	0	0	0	0	0	0	0	0	NA	NA	NA	NA
BnaVAMP724/6/8e	BnaA04g18960D	0	0	0	0	0	0	0	0	0	0	NA	NA	NA	NA
BnaVAMP724/6/8f	BnaC04g12180D	0	0.0442242	0	0.0397671	0	0.0444713	0	0.0368461	0	0.077545	NA	NA	0.080912	-0.14482
BnaVAMP724/6/8g	BnaC04g43180D	0.166525	0.16881	0.320876	0.700322	0.169448	0.256591	0	0	0.11828	0.112254	NA	0.77285	NA	1.849
BnaVAMP724/6/8h	BnaC04g43220D	0	0.458443	0	0	0	0	0	0	0	0.215836	NA	NA	NA	NA
BnaVAMP724/6/8i	BnaC04g43550D	0	0	0.230362	0.168042	0.203519	0.578314	0	0	0	0	NA	NA	NA	NA
BnaVAMP724/6/8j	BnaAnng16140D	0	0	0	0	0	0	0	0	0	0	NA	NA	NA	NA
BnaVAMP724/6/8k	BnaAnng16150D	0	0	0	0	0	0	0	0	0	0	NA	NA	NA	NA
BnaVAMP725a	BnaA08g05870D	0	0	0	0	0	0	0	0	0	0	NA	NA	NA	NA
BnaVAMP725b	BnaA01g18380D	3.03139	3.34386	3.70245	3.67929	3.69767	3.00684	4.40088	4.52653	4.05551	4.10055	-0.6021	-0.08078	-0.75311	-0.65302
BnaVAMP725c	BnaC01g22290D	3.07631	3.07284	4.15329	3.81924	4.02106	3.39144	4.50739	4.51639	4.30317	4.05919	-0.19605	-0.0016	-0.4885	-0.2038
BnaVAMP727a	BnaA04g04170D	3.34913	3.27659	4.09379	3.74326	3.50621	3.25913	4.40302	4.1865	3.90092	3.81307	-0.13592	-0.13114	-0.2607	-0.096493
BnaVAMP727b	BnaC04g26360D	3.32163	2.90467	3.39324	3.07902	2.98333	2.21143	4.01918	3.78087	3.70557	3.47409	-0.51763	-0.51434	-0.56664	-0.92354
BnaVAMP727c	BnaC06g15130D	3.9219	4.09432	4.62301	4.41695	4.39663	4.17276	4.9306	4.93791	4.85675	4.77839	-0.16031	-0.19537	-0.30987	-0.12635
BnaVAMP727d	BnaA07g16340D	4.76427	4.15137	5.05315	4.49165	4.69668	4.00294	5.25535	4.83603	5.05288	4.47473	-0.030035	-0.070787	-0.10155	0.039922
BnaVAMP727e	BnaC08g25130D	3.4716	3.54909	4.51573	4.25425	4.31252	3.6837	4.80802	4.6637	4.51574	4.3837	-0.10068	0.066708	-0.1626	-0.24031
BnaVAMP727f	BnaA09g34230D	1.563	2.01817	2.3753	2.49586	2.06275	2.22282	2.14574	2.68602	2.0495	1.84995	0.47788	0.25681	0.12049	0.98486
Note: ZS9 is the abbreviation of Zhongshuang9. Data of each treatment were normalized by log2 (FPKM+1). Log2 fold change of CK versus inoculation samples were listed in the last four lines.

[truncated: 5 more sheets: S11, S12, S13, S14, S15]
